# Supplementary material
Source: bioRxiv or medRxiv preprint supplement (https://www.biorxiv.org/highwire/filestream/104955/field_highwire_adjunct_files/0/343293-1.pdf)
Supplement: Supplementary file [file 343293-1.pdf]

# Supplementary Information

1 **Contents**

2 Contents ..... 2

3 Supplementary Figures ..... 2

4 Supplementary Tables ..... 2

5 Supplementary Note ..... 4

6     Selecting individuals from UK Biobank ..... 4

7         Spirometry Quality Control ..... 4

8         Definition of smoking status for covariate adjustment of association analyses ..... 5

9         Genotyping quality control ..... 5

10         Identification of individuals of European ancestry for inclusion in the genome-wide association analysis of lung

11         function ..... 5

12         Selecting individuals passing spirometry and genotyping quality control for genome-wide association testing .... 6

13     Power Calculations ..... 6

14     Overlap of samples ..... 6

15     Conditional analysis with GCTA ..... 6

16     Smoking behaviour association analyses in UKB ..... 6

17     Smoking interaction testing ..... 7

18     Population Attributable Risk Calculation ..... 7

19     SpiroMeta consortium study details ..... 8

20     Cohort contributors ..... 12

21 Supplementary Figures ..... 15

22 Supplementary Tables ..... 46

23 References ..... 69

24

25 **Supplementary Figures**

26 SUPPLEMENTARY FIGURE 1: 6 ETHNIC GROUPING CLUSTERS CHOSEN BY K-MEANS CLUSTERING ..... 15

27 SUPPLEMENTARY FIGURE 2: MANHATTAN PLOTS ..... 16

28 SUPPLEMENTARY FIGURE 3: ASSESSMENT OF PREVIOUSLY REPORTED SIGNALS ..... 28

29 SUPPLEMENTARY FIGURE 4: TISSUE-SPECIFIC ENRICHMENT OF OVERLAP WITH DNASE I HOTSPOTS ..... 30

30 SUPPLEMENTARY FIGURE 5: COMPARISON OF GENETIC EFFECTS FOR HEIGHT AND LUNG FUNCTION ..... 32

31 SUPPLEMENTARY FIGURE 6: COMPARISON OF EFFECT SIZES AFTER EXCLUDING ASTHMA SAMPLES ..... 33

32 SUPPLEMENTARY FIGURE 7: POWER CALCULATIONS ..... 34

33 SUPPLEMENTARY FIGURE 8: QQ PLOTS ..... 35

34 SUPPLEMENTARY FIGURE 9: INDIVIDUAL PHEWAS RESULTS, SEPARATELY BY TRAIT CATEGORY ..... 37

35 **Supplementary Tables**

36 SUPPLEMENTARY TABLE 1: UK BIOBANK DEMOGRAPHICS ..... 46

37 SUPPLEMENTARY TABLE 2: SPIROMETA STUDIES ..... 47

38 SUPPLEMENTARY TABLE 3: SPIROMETA ANALYSIS METHOD ..... 49

39 SUPPLEMENTARY TABLE 4: 139 NOVEL SIGNALS ..... 52

40 SUPPLEMENTARY TABLE 5: TIER 3 SIGNALS ..... 52

41 SUPPLEMENTARY TABLE 6: ASSOCIATION WITH SMOKING BEHAVIOUR ..... 52

42 SUPPLEMENTARY TABLE 7: SMOKING INTERACTION ..... 52

43 SUPPLEMENTARY TABLE 8: PREVIOUSLY REPORTED SIGNALS ..... 52

44 SUPPLEMENTARY TABLE 9: RESULTS FOR 279 LUNG FUNCTION SIGNALS FOR ALL 4 TRAITS ..... 52

45 SUPPLEMENTARY TABLE 10: BAYESIAN 99% CREDIBLE SETS ..... 53

46 SUPPLEMENTARY TABLE 11: FUNCTIONAL ANNOTATION OF CODING VARIANTS IN THE 99% CREDIBLE SETS ..... 53

47 SUPPLEMENTARY TABLE 12: Z SCORES AND P VALUES FOR EQTL LOOK UP IN LUNG TISSUE RESOURCES..... 53

48 SUPPLEMENTARY TABLE 13: GENES IMPLICATED BY EQTL OR PQTL ASSOCIATIONS OR DELETERIOUS VARIANTS ..... 54

49 SUPPLEMENTARY TABLE 14: PROTEINS IMPLICATED BY PQTL ANALYSIS ..... 57

50 SUPPLEMENTARY TABLE 15: PATHWAY ANALYSIS ..... 58

51 SUPPLEMENTARY TABLE 16: DEEPSEA PREDICTION OF FUNCTIONAL EFFECT ..... 60

52 SUPPLEMENTARY TABLE 17: DRUGGABILITY ANALYSIS ..... 61

53 SUPPLEMENTARY TABLE 18: UK BIOBANK AND CHINA KADOORIE BIOBANK COPD AND FEV<sub>1</sub>/FVC WEIGHTED GENETIC RISK SCORE ASSOCIATION RESULTS  
 54 (PER-ALLELE AND PER STANDARD DEVIATION) BY ANCESTRY..... 62

55 SUPPLEMENTARY TABLE 19: DEMOGRAPHICS OF COPD CASE-CONTROL COHORTS INCLUDED IN RISK SCORE INCLUDED IN RISK SCORE ANALYSIS ..... 63

56 SUPPLEMENTARY TABLE 20: EXTERNAL CASE-CONTROL STUDIES COPD RISK SCORE ASSOCIATION RESULTS (PER-ALLELE AND PER STANDARD DEVIATION) . 64

57 SUPPLEMENTARY TABLE 21: COPD RISK SCORE ASSOCIATION RESULTS IN EXTERNAL CASE-CONTROL STUDIES (PER-DECILE)..... 65

58 SUPPLEMENTARY TABLE 22: RESULTS FOR PHEWAS OF WEIGHTED GENETIC RISK SCORE ..... 66

59 SUPPLEMENTARY TABLE 23: LOOK-UP OF NEW AND PREVIOUSLY REPORTED LUNG FUNCTION SIGNALS IN GRASP AND GWAS CATALOG..... 66

60 SUPPLEMENTARY TABLE 24: LD SCORE REGRESSION RESULTS..... 67

61 SUPPLEMENTARY TABLE 25: WEIGHTS FOR COPD RISK SCORE ..... 68

62 SUPPLEMENTARY TABLE 26: STRING DRUGGABILITY ANALYSIS..... 68

63

64

## Supplementary Note

### Selecting individuals from UK Biobank

#### Spirometry Quality Control

UK Biobank contains data for 502,682 individuals. Of these, 445,754 had at least two measures of FEV<sub>1</sub> (VariableID: 3063) and FVC (VariableID: 3062), complete information for spirometry method used (VariableID: 23), age (VariableID: 21022), sex (VariableID: 31) standing height (VariableID: 50), and for whom ever smoking status could be derived (derivation of ever smoking status described below). For quality control of spirometry, the pre-derived FEV<sub>1</sub>, FVC and PEF measurements (VariableIDs: 3063, 3062 and 3064), the blow curve time series measurements (VariableID: 3066) and the Vitalograph spirometer blow quality metrics (VariableID: 20031) were used.

#### *Acceptability of blows*

To identify “acceptable” blows for inclusion in the analyses of FEV<sub>1</sub>, FVC, FEV<sub>1</sub>/FVC and PEF, the following quality control steps were undertaken;

- Blows were initially deemed to be acceptable if they contained the following values in the Vitalograph spirometer blow quality metrics; “blank”, “ACCEPT”, BELOW6SEC ACCEPT” and “BELOW6SEC”. A total of 777,676 blows from 387,430 participants were deemed acceptable.
- Next, start of blow quality was examined. Blows were excluded if the back-extrapolated volume (as defined using the blow curve time series measurements<sup>1</sup>) was less than 5% of FVC or less than 150ml. Following this exclusion, a total of 776,927 blows from 387,277 participants remained.
- Finally, a comparison of the pre-derived FEV<sub>1</sub> and FVC measurements (VariableID: 3063 and VariableID: 3062) and FEV<sub>1</sub> and FVC newly derived from the blow curve time series measurements (VariableID: 3066) was undertaken. Blows where the pre-derived and newly-derived values differed by 5% were excluded. Following this exclusion, a total of 776,318 “acceptable” blows from 387,052 participants remained for further analysis of FEV<sub>1</sub>, FVC, FEV<sub>1</sub>/FVC and PEF. Whilst PEF was also pre-derived, we identified a subset of individuals had unusually low recorded values, which were inconsistent with the PEF values derived from the time series curves; the predefined PEF values were deemed to be erroneous, therefore no exclusions were undertaken based on comparisons of pre-derived and newly-derived PEF, and the newly-derived PEF values were used for association analyses.

#### *Identification of best measures*

The “best measure” per individual was defined as the highest measure from the “acceptable” blows for FEV<sub>1</sub>, FVC. FEV<sub>1</sub>/FVC was derived from the selected FEV<sub>1</sub> and FVC. For PEF, which is a measure of flow, the best measure was defined as the blow with the highest acceptable measure of the sum of FEV<sub>1</sub> and FVC. This definition meant that a participant’s “best measures” did not necessarily have to be derived from the same blow.

#### *Reproducibility of measures*

To meet the criterion for reproducibility in our analysis, the “best measures” of FEV<sub>1</sub> and FVC had to be within 250ml of those measures from any other blow. The other blow did not need to be acceptable. Where an individual’s best measures for FEV<sub>1</sub> and FVC were not both found to be reproducible, that individual was excluded. 348,936 individuals had acceptable and reproducible measures of both FEV<sub>1</sub> and FVC and were eligible for inclusion in analyses of FEV<sub>1</sub>, FVC, FEV<sub>1</sub>/FVC and PEF.

#### *Differences in approach from previous analyses*

The previous approach used for quality control of spirometry data was described in<sup>2</sup>. This previous approach utilised the Vitalograph spirometer blow quality metrics to define acceptability only. In the present analysis, following recommendations based on work conducted for the UK Biobank Outcomes Adjudication Working Group [Strachan, personal communication], we have additionally included quality control steps based on the volume-time

109 curves recorded (at 10ms intervals) for each spirogram. Metrics derived from these curve datasets allowed a more  
110 comprehensive and systematic assessment of: start of blow quality; end of blow quality; length of blow; and  
111 derivation of flow rates. They also permitted a comparison between FEV<sub>1</sub>, FVC and PEF derived from the curve  
112 datasets and those pre-derived by the spirometer.

113 The quality control of spirometry data used in our previous publication [1] applied the ATS/ERS criteria for assessing  
114 reproducibility. These criteria, which are widely used in clinical practice, recommend that the best measures of FEV<sub>1</sub>  
115 and FVC are within 150ml of any other blow. However, within UK Biobank a subset of 20,347 participants were re-  
116 examined after an interval of 2-7 years, of whom 14,238 (70%) performed two or more spirograms with good start-  
117 of-blow and end-of blow quality on both occasions. Analysis of the within-subject between-occasion correlation  
118 (reliability coefficient) of FEV<sub>1</sub> and FVC in relation to the reproducibility of these measures at the entry examination  
119 suggested that the ATS/ERS reproducibility threshold was unduly conservative. For epidemiological studies, where  
120 spirometric comparisons are being made between groups rather than for monitoring of individual patients, a more  
121 relaxed reproducibility threshold of 250ml could be applied, increasing the available sample size without  
122 jeopardising the reliability of FEV<sub>1</sub> or FVC.

123 For illustration, among the participants with good start-of-blow and end-of-blow quality, using a reproducibility  
124 threshold of 250mL, FVC reliability was 0.9199, 0.9033, 0.8886, 0.9086 and 0.9071, respectively, for subjects with  
125 intervals of 2, 3, 4, 5 and 6-7 years between the two examinations. The corresponding figures for FEV<sub>1</sub> reliability  
126 were 0.9152, 0.9014, 0.8753, 0.8981 and 0.8992.

#### 127 Definition of smoking status for covariate adjustment of association analyses

128 Smoking initiation (123,890 ever smoked vs 151,706 never smoked) was inferred using answers from questionnaire.  
129 Never smokers are those individuals who do not smoke at present and never smoked in the past [code 1239=0 &  
130 1249=4] or do not smoke at present, smoked occasionally or just tried once or twice in the past, but had less than  
131 100 smokes in their lifetime [1239=0 & 1249=2/3 & 2644=0]. Ever smokers include current smokers (who smoke at  
132 present, on most or all days or occasionally [1239=1/2]), previous smokers (who do not smoke at present and  
133 smoked on most or all days in the past [1239=0 & 1249=1] or do not smoke at present, smoked occasionally or just  
134 tried once or twice in the past, and had more than 100 smokes in their lifetime [1239=0 & 1249=2/3 & 2644=1]) and  
135 individuals who smoked on most/all days or occasionally in the past, and smoked more than 100 times in their life,  
136 but prefer not to answer about current smoking [1239=-3 & 1249=1 or 1239=-3 & 1249=2 & 2644=1].

#### 137 Genotyping quality control

138 The genotyping procedure, genotype quality control and imputation of the UK Biobank individuals is described in  
139 detail elsewhere [ref]. 968 individuals with outlying heterozygosity or missingness were already excluded from the  
140 provided imputed genotypes. We further excluded 378 individuals for whom the submitted gender did not match  
141 the genetically inferred gender, 977 samples related to >200 other samples, 188 samples with >10 3<sup>rd</sup> degree  
142 relatives and 471 samples with putative sex chromosome aneuploidy, giving 2,008 excluded samples in total leaving  
143 486,369 samples from which to select our discovery set.

#### 144 Identification of individuals of European ancestry for inclusion in the genome-wide association analysis of 145 lung function

146 K-means clustering was used to identify the set of European- ancestry individuals to include in the genome-wide  
147 association analysis of lung function. The steps taken to define the sets of non-European ancestry individuals to  
148 include in the analysis of heterogeneity of signals is described below.

149 Principal components (PCs) were provided with the UK Biobank genetic data. K-means clustering using the first two  
150 PCs was undertaken for between 3 and 8 clusters after excluding 2,008 samples failing genotyping quality control.  
151 The 6 cluster k-means model was selected as most appropriately clustering the 486,369 samples remaining after  
152 genotype quality control (QC) into broad ethnic groups giving 453,958 samples of "European ancestry"  
153 (**Supplementary Figure** ). This resulted in an additional 45,865 individuals being eligible for inclusion in addition to  
154 the 408,093 passing genotype QC and defined as "white British" by UK Biobank<sup>3</sup>.

155 Selecting individuals passing spirometry and genotyping quality control for genome-wide association testing  
156 There was an overlap of 341,102 individuals (321,057 European) between 348,936 passing spirometry quality control  
157 for FEV<sub>1</sub>, FVC, FEV<sub>1</sub>/FVC and PEF and 486,369 passing genotyping quality control.

#### 158 *Removal of outlying lung function measures in European samples for discovery GWAS*

159 Adjustment for sex, age, age<sup>2</sup>, height, and smoking status (ever/never) of each lung function measure was  
160 undertaken in each ancestry category. 10 European individuals were excluded that were obvious outliers in plots of  
161 the adjusted phenotype distributions and the adjustment was repeated. This left 321,047 European individuals for  
162 the discovery GWAS of FEV<sub>1</sub>, FVC, FEV<sub>1</sub>/FVC and PEF.

#### 163 Power Calculations

164 Power calculations were performed with the GeneticsDesign R package  
165 (<https://bioconductor.org/packages/GeneticsDesign/>) (**Supplementary Figure 7**) to:

166 **A)** calculate the power to detect a signal passing Tier 1 or Tier 2 criteria i.e.  $P < 10^{-3}$  in the SpiroMeta cohort of 79,055  
167 samples. At this threshold, there would be 75% power to detect an effect size of 0.0325 standard deviations for a  
168 variant with MAF 10% and 95% power to detect an effect size of 0.122 standard deviations for a variant with MAF  
169 1% in SpiroMeta.

170 **B)** calculate the power to confirm a previously reported lung function quantitative trait association in UK Biobank at  
171  $P < 10^{-5}$  ( $n=321,047$ ).

#### 172 Overlap of samples

173 Each trait FEV<sub>1</sub>, FVC, FEV<sub>1</sub>/FVC and PEF were regressed against the LD score of each variant using LDSC<sup>4</sup>. The  
174 proportion of total inflation due to confounding is  $(\text{Intercept}-1)/(\text{Mean } \chi^2 - 1)$ , where  $\chi^2$  is the mean statistic from the  
175 association testing and the intercept is the intercept of the LD score regression (estimate of inflation due to  
176 confounding but not polygenicity). The proportion of inflation due to confounding in the meta-analysis was low  
177 ( $< 4\%$ ) (**Supplementary Table 25**), hence we did not conclude overlap of samples between UK Biobank and  
178 SpiroMeta.

#### 179 Conditional analysis with GCTA

180 All SNPs  $\pm 1\text{Mb}$  were extracted around each sentinel variant. GCTA<sup>5</sup> was then used to perform stepwise conditional  
181 analysis in order to select independently associated SNPs within each 2Mb region using the single SNP association  
182 statistics combined with LD information from reference genotypes representative of the samples in the association  
183 testing. For UK Biobank the same genotype data as used for the initial discovery association testing was used as an  
184 LD reference; for SpiroMeta, genotypes from 48,943 unrelated participants<sup>6</sup> formed the LD reference set

#### 185 Smoking behaviour association analyses in UKB.

186 Association analyses with smoking behaviour phenotypes were performed in the 335,641 UKB individuals out of the  
187 full 488,377 included in the final release of genetic data that were not in the 152,736 in the interim release  
188 (<http://www.ukbiobank.ac.uk/scientists-3/genetic-data/>), as part of an independent replication for the GSCAN study  
189 that included samples from the UK Biobank interim release.

190 Genotyping quality control was performed using the same criteria as for the lung function analysis (individuals  
191 excluded on the basis of sex mismatches, heterozygosity and missingness). Only individuals of European ancestry  
192 were included in the association analyses. These were identified by first calculating the minimum and maximum  
193 value of the first 4 PCs of the samples defined as white British in UK Biobank [ref to QC paper] and then we included  
194 any individual in this PC range regardless of their self-reported ancestry. Individuals who were related to UK Biobank  
195 individuals included in previous releases with a kinship coefficient  $> 0.075$  were excluded from the analyses. Only  
196 variants imputed on the HRC panel and with MAC  $\geq 3$  were included in the analyses.

197 Smoking initiation (123,890 ever smoked vs 151,706 never smoked) was inferred using answers from questionnaire  
198 as for the smoking covariate adjustment above.

199 The average number of cigarettes smoked per day (CPD) for all individuals who smoke, or smoked, on most or all  
200 days was binned as follows: 1 = 1-5, 2 = 6-15, 3 = 16-25, 4 = 26-35, 5 = 36+. Cigarettes per day was available for  
201 80,015 samples.

202 All phenotypes used age, age squared, sex, and genetic principal components 1-15 as covariates. Residuals were  
203 calculated for each phenotype by linear regression, with the phenotype as the dependent variable and the  
204 corresponding covariates as the independent variables. These residuals were then inverse normalized, and the  
205 corresponding z-scores were used as the input phenotype values for the association analysis.

206 BOLT-LMM version 2.3 was used to conduct association analysis on each chromosome. The variants included in the  
207 mixed model were extracted from the genotyped variants by applying the following filters: missingness < 5%, minor  
208 allele frequency > 1%, HWE  $p > 10^{-6}$ , pruning for LD  $r^2 < 0.2$ . The hg19 reference map was used to interpolate genetic  
209 map coordinates. BOLT-LMM statistic was calibrated using the 1000 genomes LD scores reference table.

## 210 Smoking interaction testing

211 Association testing for lung function was calculated separately in ever and never smoker subgroups and meta-  
212 analysed across UK Biobank and SpiroMeta for up to 176,701 ever smokers and 197,999 never smokers. The Welch  
213 test was used to compare genetic effect between ever and never smokers:

$$214 \quad t = \frac{\beta_1 - \beta_2}{\sqrt{se_1^2 + se_2^2}}$$

215 with degrees of freedom:

$$216 \quad d.f. = \frac{(se_1^2 + se_2^2)^2}{\frac{se_1^2}{n_1 - 1} + \frac{se_2^2}{n_2 - 1}}$$

218  
219 A deviation from equality ( $P < 1.8 \times 10^{-4}$ , i.e. 0.05/279 tests) was considered significant evidence of interaction. For  
220 these analyses, phenotypes were inverse normalised after regressing on sex, age, age<sup>2</sup>, and height. Genotyping array  
221 was included as a covariate.

222 Using the *European only* sample as input for relatedness exclusion here resulted in a marginally bigger sample size  
223 than that produced when including all ancestries (N = 303,619 cf. N = 303,570).

## 225 Population Attributable Risk Calculation

226 We calculated the population attributable risk fraction (PARF) as follows:

$$227 \quad PARF = \frac{P(E)(OR - 1)}{1 + P(E)(OR - 1)}$$

228 where  $P(E)$  is set to 0.9, i.e. the probability of possessing more risk alleles than those in the lowest decile of the risk  
229 score (the 'probability of the exposure').  $OR$  above refers to the odds of having COPD in individuals across deciles 2  
230 to 10 of the risk score compared to the odds of having COPD for individuals in the lowest decile (decile 1) of the risk  
231 score.

232 Before calculating the PARF, we used the European meta-analysis OR of 1.546 (95CI: 1.476-1.620) per SD of the  
233 genetic risk score (GRS) to estimate the  $OR$  for COPD, comparing individuals in deciles 2-10 vs those in decile 1. We  
234 assume that the GRS is normally distributed so that  $\log(1.546)$  is the additive effect on a standard normal variable.

235 The expected GRS, given that an individual is in decile  $j$  of the GRS, is

236

$$\frac{1}{0.1} \int_{\Phi^{-1}\left(\frac{j-1}{10}\right)}^{\Phi^{-1}\left(\frac{j}{10}\right)} x\phi(x) dx$$

237

238

239

The limits of the integral are the lower and upper values of the GRS for individuals in decile  $j$ , assuming the GRS is standard normal. The division by 0.1 ensures the expectation is conditional on the individual being in the decile, which is  $1/10$  by definition.

240

Then the expected log OR for decile  $j$  is

241

$$\frac{\log(1.546)}{0.1} \int_{\Phi^{-1}\left(\frac{j-1}{10}\right)}^{\Phi^{-1}\left(\frac{j}{10}\right)} x\phi(x) dx$$

242

and comparing with decile 1 gives

243

$$\frac{\log(1.546)}{0.1} \left[ \int_{\Phi^{-1}\left(\frac{j-1}{10}\right)}^{\Phi^{-1}\left(\frac{j}{10}\right)} x\phi(x) dx - \int_{-\infty}^{\Phi^{-1}\left(\frac{1}{10}\right)} x\phi(x) dx \right]$$

244

We can now proceed to estimate the log OR for deciles 2-10 vs decile 1 as

245

$$\log(1.546) \left[ \frac{1}{0.9} \int_{\Phi^{-1}\left(\frac{1}{10}\right)}^{\infty} x\phi(x) dx - \frac{1}{0.1} \int_{-\infty}^{\Phi^{-1}\left(\frac{1}{10}\right)} x\phi(x) dx \right] = \log(2.339)$$

246

247

The estimated bounds of the 95% confidence interval around this new estimate are then calculated using the same method, and entered into the PARF equation, above.

248

### [SpiroMeta consortium study details](#)

249

250

251

This section provides study descriptions for the cohorts contributing to the SpiroMeta consortium. All participants provided written informed consent and studies were approved by local Research Ethics Committees and/or Institutional Review boards.

252

253

254

Details of the **British 1958 Birth Cohort** biomedical follow-up have been previously reported<sup>7</sup>. Spirometry at age 44–45 years was done in the standing position without nose clips, using a Vitalograph handheld spirometer as previously described<sup>8</sup>. In the analysis, all readings with a best-test variation greater than 10% were excluded.

255

256

257

258

259

260

The **Busselton Health Study** (BHS) is a longitudinal survey of the town of Busselton in the south-western region of Western Australia that began in 1966. In 1994/1995 a cross-sectional community follow-up study was undertaken where blood was taken for DNA extraction. A sample of 1,168 European-ancestry individuals were genotyped using the Illumina 610-Quad BeadChip (BHS1), and subsequent genotyping was carried out on an independent group of 3,428 European-ancestry individuals using Illumina 660W-Quad (BHS2). Spirometric measures of forced expired volume in one second (FEV<sub>1</sub>) and forced vital capacity (FVC) were assessed.

261

262

263

264

265

266

267

268

269

270

The CROATIA study was initiated to investigate the use of isolated rather than urban populations for the identification of genes associated with medically-relevant quantitative traits. Three cohorts have been recruited as part of the CROATIA study: **CROATIA-Vis**<sup>9</sup>, **CROATIA-Korcula**<sup>10</sup> and **CROATIA-Split**<sup>11</sup>. CROATIA-Vis was the first to be collected when 1,008 Croatians aged 18-93 recruited from the villages of Komiza and Vis on the Dalmatian island of Vis. Recruitment occurred from 2003 to 2004 with participants donating blood for DNA extraction and biochemical measurements as well as undergoing some anthropometric measurements and physiological tests to measure traits such as height, weight and blood pressure, and finally completing several questionnaires relating to general health, medical history, diet and lifestyle. CROATIA-Korcula was recruited from 2007 to 2008 from the town of Korcula and the villages of Lumbarda, Zrnovo and Racisce on the island of Korcula, Croatia with 969 adults aged 18-98 agreeing to participate. This study followed the same recruitment procedures as CROATIA-Vis and the same samples and tests



271 were collected with a few additions to reflect the research interests and expertise in Edinburgh. Volunteers were  
272 recruited to be part of the CROATIA-Split cohort in 2009-2010 from the Dalmatian mainland city of Split. This is the  
273 main ferry port to the islands and is the second largest city in Croatia and the largest along the Dalmatian coast.  
274 1,012 adults aged 18-85 were recruited using the same methodology and with the same samples collected as in  
275 CROATIA-Korcula. Ethical approval was obtained from appropriate regulatory bodies in both Scotland and Croatia  
276 and participants gave informed consent prior to joining the study.

277 **European Prospective Investigation of Cancer (EPIC)-Norfolk** is an ongoing UK-based prospective cohort and part of  
278 the Europe-wide multi-centre EPIC study. Details of the study design were described previously.<sup>12</sup> Briefly, 25,639  
279 men and women aged 40-79 in eastern England were recruited through general practice registers and underwent  
280 baseline assessment between 1993 and 1997. Participants were further invited to the follow-up assessment (1998  
281 to 2000), and were followed up by 2009 for incident outcomes and by 2013 for mortality.

282 **The Generation Scotland: Scottish Family Health Study** is a collaboration between the Scottish Universities and the  
283 NHS, funded by the Chief Scientist Office of the Scottish Government. GS:SFHS is a family-based genetic  
284 epidemiology cohort with DNA, other biological samples (serum, urine and cryopreserved whole blood) and socio-  
285 demographic and clinical data from ~24,000 volunteers, aged 18-98 years, in ~7,000 family groups. Participants were  
286 recruited across Scotland, with some family members from further afield, from 2006-2011. Most (87%) participants  
287 were born in Scotland and 96% in the UK or Ireland. The cohort profile has been published<sup>13</sup>. GS:SFHS operates  
288 under appropriate ethical approvals, and all participants gave written informed consent. Generation Scotland is a  
289 collaboration between the University Medical Schools and National Health Service in Aberdeen, Dundee, Edinburgh  
290 and Glasgow (UK).

291 The DNA archive established from the **Health 2000** Survey Cohort was used. Details of this study population and  
292 phenotyping procedures have been previously reported<sup>14</sup>. Genome-wide genotyping was available for 2124  
293 individuals selected from the Health 2000 cohort as metabolic syndrome cases and their matched controls<sup>15</sup>.  
294 Spirometry was done in the standing position without nose clips, using a Vitalograph 2150 spirometer. In the  
295 analysis, the maximum permissible difference between the two highest FEV<sub>1</sub> and FVC values was 10%.

296 The KORA studies (Cooperative Health Research in the Region of Augsburg) are a series of independent population  
297 based studies from the general population living in the region of Augsburg, Southern Germany<sup>16,17</sup>. **KORA F4**  
298 including 3,080 individuals was conducted from 2006-2008 as a follow-up study to KORA S4 (1999-2001). Lung  
299 function tests were performed in a random subsample of subjects born between 1946 and 1965 (age range 41-63  
300 years). Spirometry was performed in line with the ATS/ERS recommendations<sup>1</sup> using a pneumotachograph-type  
301 spirometer (Masterscreen PC, CardinalHealth, Würzburg, Germany) before and after inhalation of 200µg salbutamol.  
302 The present study is based on maximum values of FEV<sub>1</sub> and FVC measured before bronchodilation. The spirometer  
303 was calibrated daily using a calibration pump (CardinalHealth, Würzburg, Germany), and additionally, an internal  
304 control was used to ensure constant instrumental conditions. For KORA F4 participants without spirometry  
305 measurements in 2006-2008, we used measurements from the KORA-Age time point conducted in 2008/09. KORA  
306 Age contains subjects from all KORA studies born until 1943 (aged 65-90 years)<sup>18</sup>. Spirometry was measured in 935  
307 randomly selected participants. Conditions including the examiner were the same as in 2008/09 except that  
308 inhalation of salbutamol was not performed due to the high number of contraindications anticipated in this aged  
309 population.

310 The KORA studies (Cooperative Health Research in the Region of Augsburg) are a series of independent population  
311 based studies from the general population living in the region of Augsburg, Southern Germany<sup>16,17</sup>. The **KORA S3**  
312 study including 4,856 individuals was conducted in 1994/95. Spirometry was measured during a follow up in 1997/98  
313 for all participants younger than 60 years who did not smoke or use inhalers one hour before the test. All spirometric  
314 tests were performed strictly adhering to the ECRHS protocol<sup>19,20</sup> using Biomedin Spirometers (Biomedin srl, Padova,  
315 Italy). Tests were accounted valid if at least two technically satisfactory manoeuvres could be obtained throughout a  
316 maximum of nine trials. FEV<sub>1</sub> and FVC were defined as the maximum value within all valid manoeuvres. For KORA S3

317 participants without spirometry measurements in 1997/98 we used measurements from the KORA-Age time point  
318 conducted in 2008/09. KORA Age contains subjects from all KORA studies born until 1943 (aged 65–90 years)<sup>18</sup>.  
319 Spirometry was measured in 935 randomly selected participants. Conditions including the examiner were the same  
320 as in KORA F4 (see below) except that inhalation of salbutamol was not performed due to the high number of  
321 contraindications anticipated in this aged population.

322 The **Lothian Birth Cohort 1936** consists of 1,091 relatively healthy individuals assessed on cognitive and medical  
323 traits at about 70 years of age. They were all born in 1936 and most took part in the Scottish Mental Survey of 1947.  
324 At baseline the sample of 548 men and 543 women had a mean age 69.6 years (s.d. = 0.8). They were all Caucasian,  
325 community-dwelling, and almost all lived in the Lothian region (Edinburgh city and surrounding area) of Scotland. A  
326 full description of participant recruitment and testing can be found elsewhere<sup>21</sup>. Genotyping was performed at the  
327 Wellcome Trust Clinical Research Facility, Edinburgh. Quality control measures were applied and 1,005 participants  
328 remained. Lung function assessing peak expiratory flow rate, forced expiratory volume in 1 second, and forced vital  
329 capacity (each the best of three), using a Micro Medical Spirometer was assessed, sitting down without nose clips, at  
330 age 70 years. The accuracy of the spirometer is  $\pm 3\%$  (to ATS recommendations Standardisation of Spirometry 1994  
331 update for flows and volumes).

332 The **Northern Finland Birth Cohort 1966 (NFBC1966)** is a prospective follow-up study of children from the two  
333 northernmost provinces of Finland born in 1966.<sup>22</sup> All individuals still living in northern Finland or the Helsinki area (n  
334 = 8,463) were contacted and invited for clinical examination. A total of 6007 participants attended the clinical  
335 examination at the participants' age of 31 years. DNA was extracted from blood samples given at the clinical  
336 examination (5,753 samples available).<sup>23</sup> The subset with DNA is representative of the original cohort in terms of  
337 major environmental and social factors. Informed consent was obtained from all subjects. After performing standard  
338 sample QC we included 5,402 NFBC1966 participants that were genotyped on an Illumina HumanCNV370DUO  
339 Analysis BeadChip. 329,401 variants were included in the imputation scaffold. Variants were imputed to the HRC  
340 reference r1.1 2016 on the Michigan Imputation Server. Prior to analysis we excluded variants monomorphic in this  
341 dataset. In NFBC1966, we used a Vitalograph P-model spirometer (Vitalograph Ltd., Buckingham, UK), with a  
342 volumetric accuracy of  $\pm 2\%$  or  $\pm 50$  mL whichever was greater. The spirometer was calibrated regularly using a 1-Litre  
343 precision syringe. The spirometric manoeuvre was performed three times but was repeated if the coefficient of  
344 variation between two maximal readings was  $>4\%$ .

345 The **Northern Finland Birth Cohort 1986 (NFBC1986)** consists of 99% of all children, who were born in the provinces  
346 of Oulu and Lapland in Northern Finland between 1 July 1985 and 30 June 1986. 9,203 live-born individuals entered  
347 the study.<sup>24</sup> At the age of 16, the subjects living in the original target area or in the capital area (n=9,215) were  
348 invited to participate in a follow-up study including a clinical examination. 7,344 participants attend the study in year  
349 2001/2002, of which 5,654 completed the postal questionnaire, the clinical examination and provided a blood  
350 sample.<sup>25</sup> DNA was extracted from all 5,654 blood samples. An informed consent for the use of the data including  
351 DNA was obtained from all subjects. After performing standard sample QC we included 3,743 NFBC1986 participants  
352 that were genotyped on an Illumina Human Omni Express Exome 8v1.2 BeadChip. 889,119 variants were included in  
353 the imputation scaffold. Variants were imputed to the HRC reference r1.1 2016 on the Michigan Imputation Server.  
354 For Spirometry measurements, we used a Vitalograph Gold Standard (Model 2150) (Vitalograph Ltd., Buckingham,  
355 UK). The machines were calibrated every day the medical examination took place. The spirometric manoeuvre was  
356 performed in an upright sitting position while wearing a nose clip. At least three acceptable manoeuvres were  
357 performed. Acceptable manoeuvres did not exceed a difference between two maximal FEV<sub>1</sub> and FVC values of 4%.  
358 The results were recorded with a 0.05 litre accuracy.

359 The **Northern Sweden Population Health Study (NSPHS)** represents a cross-sectional study conducted in the  
360 communities of Karesuando (samples gathered in 2006) and Soppero (2009) in the subarctic region of the County of  
361 Norrbotten, Sweden. Spirometry was performed in sitting position without noseclips using a MicroMedicalSpida 5  
362 spirometer (<http://www.medisave.co.uk>). Three consecutive 28 lung function measurements per participant were  
363 done and the maximum value per measured lung function parameter was used for further analysis. Relatedness was

364 taken into account by applying the "polygenic" linear mixed effects model. Genome-wide association analysis was  
365 performed using a score test, a family-based association test<sup>26</sup> which uses the residuals and the variance-covariance  
366 matrix from the polygenic model and the SNP fixed effect coded under an additive model.

367 The **Orkney Complex Disease Study** (ORCADES) is an ongoing family-based, cross-sectional study in the isolated  
368 Scottish archipelago of Orkney. Spirometry was performed in the sitting position without nose clips, using a Spida  
369 handheld spirometer. Measurements were repeated once and the better reading was used for analysis.

370 The **Prospective Investigation of the Vasculature in Uppsala Seniors** (PIVUS)<sup>27</sup> is a population-based study of  
371 cardiovascular health in the elderly. Mailed invitations were sent to subjects who lived in Uppsala, Sweden, within 2  
372 months after their 70th birthday. The subjects were randomly selected from the community register. A total of 1,016  
373 men and women participated in the baseline investigation (participation rate, 50.1%). Spirometry was performed in  
374 901 subjects at baseline in accordance with American Thoracic Society recommendations ( $\alpha$  spirometer; Vitalograph  
375 Ltd; Buckingham, UK). The best value from three recordings was used. The Ethics Committee of the University of  
376 Uppsala approved the study, and the participants gave their informed consent. Genotyping of all samples was  
377 undertaken using the Illumina Omni Express and CardioMetaboChip. Genotypes were called using GENCALL. A total  
378 of 738,879 SNPs passed quality control (thresholds: call rate < 0.95, and call rate < 0.99 for MAF<5%; HWE  $P < 10^{-6}$ ).  
379 SNPs with MAF<1% were removed from the imputation scaffold. Imputation was performed using IMPUTE up to  
380 haplotypes from the Haplotype Reference Consortium.

381 The **SAPALDIA** cohort is a population-based multi-center study in eight geographic areas representing the range of  
382 environmental, meteorological and socio-demographic conditions in Switzerland<sup>28,29</sup>. It was initiated in 1991  
383 (SAPALDIA 1) with a follow-up assessment in 2002 (SAPALDIA 2) and 2010 (SAPALDIA3). This study has specifically  
384 been designed to investigate longitudinally lung function, respiratory and cardiovascular health; to study and identify  
385 the associations of these health indicators with individual long term exposure to air pollution, other toxic inhalants,  
386 life style and molecular factors.

387 The **Study of Health In Pomerania (SHIP)**<sup>30</sup> is a cross-sectional and prospective longitudinal population-based cohort  
388 study in Western Pomerania assessing the prevalence and incidence of common diseases and their risk factors. SHIP  
389 encompasses the two independent cohorts **SHIP** and **SHIP-TREND**. A total of 4,308 participants were recruited  
390 between 1997 and 2001 in the SHIP cohort. Between 2008 and 2012 a total of 4,420 participants were recruited in  
391 the SHIP-TREND cohort. Individuals were invited to the SHIP study centre for a computer-assisted personal  
392 interviews and extensive physical examinations.

393 The examinations for **SHIP** were conducted using a body plethysmograph equipped with a pneumotachograph  
394 (VIASYS Healthcare, JAEGER, Hoechberg, Germany) which meets the American Thoracic Society (ATS) criteria.<sup>31</sup> The  
395 volume signal of the equipment was calibrated with a 3.0 litre syringe connected to the pneumotachograph in  
396 accordance with the manufacturer's recommendations and at least once on each day's testing. Barometric pressure,  
397 temperature and relative humidity were registered every morning. Calibration of reference gas and volume was  
398 examined under ATS-conditions (Ambient Temperature Pressure) and the integrated volumes were BTPS (Body  
399 Temperature Pressure Saturated) corrected.<sup>31,32</sup> Lung function variables were measured continuously throughout the  
400 baseline breathing and the forced manoeuvres using a VIASYS HEALTHCARE system (MasterScreen Body/Diff.).  
401 Spirometry flow volume loops were conducted in accordance with ATS recommendations<sup>32</sup> in a sitting position and  
402 with wearing nose clips. The participants performed at least three forced expiratory lung function manoeuvres in  
403 order to obtain a minimum of two acceptable and reproducible values.<sup>33</sup> Immediate on-screen error codes indicating  
404 the major acceptability (including start, duration and end of test) and reproducibility criteria supported the attempt  
405 for standardised procedures. The procedure was continuously monitored by a physician. The best results for FVC,  
406 FEV1, peak expiratory flow (PEF) and expiratory flow at 75%, 50%, 25% of FVC (MEF 75, MEF 50, MEF 25) were taken.  
407 The ratio of FEV1 to FVC was calculated from the largest FEV1 and FVC.

408 In terms of the pulmonary items the computer-assisted interview in **SHIP-TREND** was nearly identical to that of the  
409 SHIP. Of the 4.420 subjects who have been investigated in the study, 2.678 (60.6 %) of the subjects have undergone  
410 spirometry, body plethysmography, and measurements of diffusing capacity (CO and NO), IOS and respiratory

411 muscle strength. In SHIP-TREND, the following additional methods that are of particular interest in terms of lung  
412 health and comorbidities have been applied: polysomnography, analysis of volatile compounds in the exhaled  
413 breath, and whole-body MRI. The following devices have been used for the pulmonary investigations in SHIP-TREND:  
414 a MasterScreen for body plethysmography, diffusing capacity measurements (single breath) and measurements of  
415 respiratory muscle strength (Viasys Healthcare, Hoechberg, Germany), an ABL 500 and later an ABL 80 for blood gas  
416 analyses (Radiometer, Copenhagen, Denmark), a MasterScreen PFT Pro CO-NO-Diffusion (CareFusion, Hoechberg,  
417 Germany), a MasterScreen IOS for Impuls-Oscillometry (CareFusion, Hoechberg, Germany), and a MicroCO carbon  
418 monoxide monitor (CareFusion, Hoechberg, Germany).

419 The **United Kingdom Household Longitudinal Study (UKHLS)**, also known as Understanding Society  
420 (<https://www.understandingsociety.ac.uk>) is a longitudinal panel survey of 40,000 UK households (England,  
421 Scotland, Wales and Northern Ireland) representative of the UK population. Participants are surveyed annually since  
422 2009 and contribute information relating to their socioeconomic circumstances, attitudes, and behaviours via a  
423 computer assisted interview. The study includes phenotypical data for a representative sample of participants for a  
424 wide range of social and economic indicators as well as a biological sample collection encompassing biometric,  
425 physiological, biochemical, and haematological measurements and self-reported medical history and medication  
426 use. The United Kingdom Household Longitudinal Study has been approved by the University of Essex Ethics  
427 Committee and informed consent was obtained from every participant.

428 For a subset of individuals who took part in a nurse health assessment, blood samples were taken and genomic DNA  
429 extracted. Of these, 10,484 samples were genotyped at the Wellcome Trust Sanger Institute using the Illumina  
430 Infinium HumanCoreExome-12 v1.0BeadChip.

431 Lung function measures in samples from England and Wales were conducted with the NDD Easy On-PC spirometer  
432 (NDD Medical Technologies, Zurich, Switzerland). Participants were excluded in the following cases: pregnancy,  
433 having had abdominal or chest surgery (past 3 weeks), admitted to the hospital with a heart complaint (in the past 6  
434 weeks), having had recent eye surgery (past 4 weeks), or in case of having a tracheostomy. Subjects were asked to  
435 perform up to 8 blows that ideally lasted at least 6 seconds, uninterrupted by coughing, glottis closure, laughing or  
436 leakage of air. Upon completion, the measurements were rated either acceptable or unacceptable by the NDD Easy  
437 On-PC software.

438 The Viking Health Study - Shetland (**VIKING**) is a family-based, cross-sectional study that seeks to identify genetic  
439 factors influencing cardiovascular and other disease risk in the population isolate of the Shetland Isles in northern  
440 Scotland. Genetic diversity in this population is decreased compared to Mainland Scotland, consistent with the high  
441 levels of endogamy historically. Participants were recruited between 2013 and 2015, each having at least three  
442 grandparents from Shetland. Fasting blood samples were collected and over 300 health-related phenotypes and  
443 environmental exposures were measured in each individual. All participants gave informed consent and the study  
444 was approved by the South East Scotland Research Ethics Committee.

445 The **Young Finns Study (YFS)** is a population-based follow up-study started in 1980<sup>34</sup>. The main aim of the YFS is to  
446 determine the contribution made by childhood lifestyle, biological and psychological measures to the risk of  
447 cardiovascular diseases in adulthood. In 1980, over 3,500 children and adolescents all around Finland participated in  
448 the baseline study. The follow-up studies have been conducted mainly with 3-year intervals. The latest 30-year  
449 follow-up study was conducted in 2010-2011 (ages 33-49 years) with 2,063 participants. The study was approved by  
450 the local ethics committees (University Hospitals of Helsinki, Turku, Tampere, Kuopio and Oulu) and was conducted  
451 following the guidelines of the Declaration of Helsinki. All participants gave their written informed consent.

## 452 Cohort contributors

### 453 UNDERSTANDING SOCIETY SCIENTIFIC GROUP

454 The UK Household Longitudinal Study: Michaela Benzeval,<sup>1</sup> Jonathan Burton,<sup>1</sup> Nicholas Buck,<sup>1</sup> Annette Jäckle,<sup>1</sup>  
455 Meena Kumari,<sup>1</sup> Heather Laurie,<sup>1</sup> Peter Lynn,<sup>1</sup> Stephen Pudney,<sup>1</sup> Birgitta Rabe,<sup>1</sup> Dieter Wolke<sup>2</sup>

456 1. Institute for Social and Economic Research

457 2. University of Warwick

458 **COPDGene**

459 **Grant Support and Disclaimer**

460 The project described was supported by Award Number U01 HL089897 and Award Number U01 HL089856 from the  
461 National Heart, Lung, and Blood Institute. The content is solely the responsibility of the authors and does not  
462 necessarily represent the official views of the National Heart, Lung, and Blood Institute or the National Institutes of  
463 Health.

464 **COPD Foundation Funding**

465 The COPDGene® project is also supported by the COPD Foundation through contributions made to an Industry  
466 Advisory Board comprised of AstraZeneca, Boehringer Ingelheim, GlaxoSmithKline, Novartis, Pfizer, Siemens and  
467 Sunovion.

468 **COPDGene® Investigators – Core Units**

469 *Administrative Center:* James D. Crapo, MD (PI); Edwin K. Silverman, MD, PhD (PI); Barry J. Make, MD; Elizabeth A.  
470 Regan, MD, PhD

471 *Genetic Analysis Center:* Terri Beaty, PhD; Ferdouse Begum, PhD; Peter J. Castaldi, MD, MSc; Michael Cho, MD; Dawn  
472 L. DeMeo, MD, MPH; Adel R. Boueiz, MD; Marilyn G. Foreman, MD, MS; Eitan Halper-Stromberg; Lystra P. Hayden,  
473 MD, MMSc; Craig P. Hersh, MD, MPH; Jacqueline Hetmanski, MS, MPH; Brian D. Hobbs, MD; John E. Hokanson, MPH,  
474 PhD; Nan Laird, PhD; Christoph Lange, PhD; Sharon M. Lutz, PhD; Merry-Lynn McDonald, PhD; Margaret M. Parker,  
475 PhD; Dandi Qiao, PhD; Elizabeth A. Regan, MD, PhD; Edwin K. Silverman, MD, PhD; Emily S. Wan, MD; Sungho Won,  
476 Ph.D.; Phuwanat Sakornsakolpat, M.D.; Dmitry Prokopenko, Ph.D.

477 *Imaging Center:* Mustafa Al Qaisi, MD; Harvey O. Coxson, PhD; Teresa Gray; MeiLan K. Han, MD, MS; Eric A.  
478 Hoffman, PhD; Stephen Humphries, PhD; Francine L. Jacobson, MD, MPH; Philip F. Judy, PhD; Ella A. Kazerooni, MD;  
479 Alex Kluiber; David A. Lynch, MB; John D. Newell, Jr., MD; Elizabeth A. Regan, MD, PhD; James C. Ross, PhD; Raul San  
480 Jose Estepar, PhD; Joyce Schroeder, MD; Jered Sieren; Douglas Stinson; Berend C. Stoel, PhD; Juerg Tschirren, PhD;  
481 Edwin Van Beek, MD, PhD; Bram van Ginneken, PhD; Eva van Rikxoort, PhD; George Washko, MD; Carla G. Wilson,  
482 MS;

483 *PFT QA Center, Salt Lake City, UT:* Robert Jensen, PhD

484 *Data Coordinating Center and Biostatistics, National Jewish Health, Denver, CO:* Douglas Everett, PhD; Jim Crooks,  
485 PhD; Camille Moore, PhD; Matt Strand, PhD; Carla G. Wilson, MS

486 *Epidemiology Core, University of Colorado Anschutz Medical Campus, Aurora, CO:* John E. Hokanson, MPH, PhD; John  
487 Hughes, PhD; Gregory Kinney, MPH, PhD; Sharon M. Lutz, PhD; Katherine Pratte, MSPH; Kendra A. Young, PhD

488 *Mortality Adjudication Core:* Surya Bhatt, MD; Jessica Bon, MD; MeiLan K. Han, MD, MS; Barry Make, MD; Carlos  
489 Martinez, MD, MS; Susan Murray, ScD; Elizabeth Regan, MD; Xavier Soler, MD; Carla G. Wilson, MS

490 *Biomarker Core:* Russell P. Bowler, MD, PhD; Katerina Kechris, PhD; Farnoush Banaei-Kashani, Ph.D

491 **COPDGene® Investigators – Clinical Centers**

492 *Ann Arbor VA:* Jeffrey L. Curtis, MD; Carlos H. Martinez, MD, MPH; Perry G. Pernicano, MD

493 *Baylor College of Medicine, Houston, TX:* Nicola Hanania, MD, MS; Philip Alapat, MD; Mustafa Atik, MD; Venkata  
494 Bandi, MD; Aladin Boriek, PhD; Kalpatha Guntupalli, MD; Elizabeth Guy, MD; Arun Nachiappan, MD; Amit Parulekar,  
495 MD;

496 *Brigham and Women's Hospital, Boston, MA:* Dawn L. DeMeo, MD, MPH; Craig Hersh, MD, MPH; Francine L.  
497 Jacobson, MD, MPH; George Washko, MD

498 *Columbia University, New York, NY:* R. Graham Barr, MD, DrPH; John Austin, MD; Belinda D'Souza, MD; Gregory D.N.  
499 Pearson, MD; Anna Rozenshtein, MD, MPH, FACR; Byron Thomashow, MD

500 *Duke University Medical Center, Durham, NC:* Neil MacIntyre, Jr., MD; H. Page McAdams, MD; Lacey Washington, MD  
501 *HealthPartners Research Institute, Minneapolis, MN:* Charlene McEvoy, MD, MPH; Joseph Tashjian, MD

502 *Johns Hopkins University, Baltimore, MD:* Robert Wise, MD; Robert Brown, MD; Nadia N. Hansel, MD, MPH; Karen  
503 Horton, MD; Allison Lambert, MD, MHS; Nirupama Putcha, MD, MHS

504 *Los Angeles Biomedical Research Institute at Harbor UCLA Medical Center, Torrance, CA:* Richard Casaburi, PhD, MD;  
505 Alessandra Adami, PhD; Matthew Budoff, MD; Hans Fischer, MD; Janos Porszasz, MD, PhD; Harry Rossiter, PhD;  
506 William Stringer, MD

507 *Michael E. DeBakey VAMC, Houston, TX:* Amir Sharafkhaneh, MD, PhD; Charlie Lan, DO

508 *Minneapolis VA:* Christine Wendt, MD; Brian Bell, MD

509 *Morehouse School of Medicine, Atlanta, GA:* Marilyn G. Foreman, MD, MS; Eugene Berkowitz, MD, PhD; Gloria  
510 Westney, MD, MS

511 *National Jewish Health, Denver, CO:* Russell Bowler, MD, PhD; David A. Lynch, MB

512 *Reliant Medical Group, Worcester, MA:* Richard Rosiello, MD; David Pace, MD

513 *Temple University, Philadelphia, PA:* Gerard Criner, MD; David Ciccolella, MD; Francis Cordova, MD; Chandra Dass,  
514 MD; Gilbert D'Alonzo, DO; Parag Desai, MD; Michael Jacobs, PharmD; Steven Kelsen, MD, PhD; Victor Kim, MD; A.  
515 James Mamary, MD; Nathaniel Marchetti, DO; Aditi Satti, MD; Kartik Shenoy, MD; Robert M. Steiner, MD; Alex Swift,  
516 MD; Irene Swift, MD; Maria Elena Vega-Sanchez, MD

517 *University of Alabama, Birmingham, AL:* Mark Dransfield, MD; William Bailey, MD; Surya Bhatt, MD; Anand Iyer, MD;  
518 Hrudaya Nath, MD; J. Michael Wells, MD

519 *University of California, San Diego, CA:* Joe Ramsdell, MD; Paul Friedman, MD; Xavier Soler, MD, PhD; Andrew Yen,  
520 MD

521 *University of Iowa, Iowa City, IA:* Alejandro P. Comellas, MD; Karin F. Hoth, PhD; John Newell, Jr., MD; Brad  
522 Thompson, MD

523 *University of Michigan, Ann Arbor, MI:* MeiLan K. Han, MD, MS; Ella Kazerooni, MD; Carlos H. Martinez, MD, MPH

524 *University of Minnesota, Minneapolis, MN:* Joanne Billings, MD; Abbie Begnaud, MD; Tadashi Allen, MD

525 *University of Pittsburgh, Pittsburgh, PA:* Frank Scurba, MD; Jessica Bon, MD; Divay Chandra, MD, MSc; Carl Fuhrman,  
526 MD; Joel Weissfeld, MD, MPH

527 *University of Texas Health Science Center at San Antonio, San Antonio, TX:* Antonio Anzueto, MD; Sandra Adams, MD;  
528 Diego Maselli-Caceres, MD; Mario E. Ruiz, MD

529

530 **Supplementary Figures**

531 **Supplementary Figure 1: 6 ethnic grouping clusters chosen by K-means clustering**

532 A) K-means clustering was performed on the first 2 principal components. 6 clusters were chosen to infer ancestry groupings. The black dots show the cluster centres.

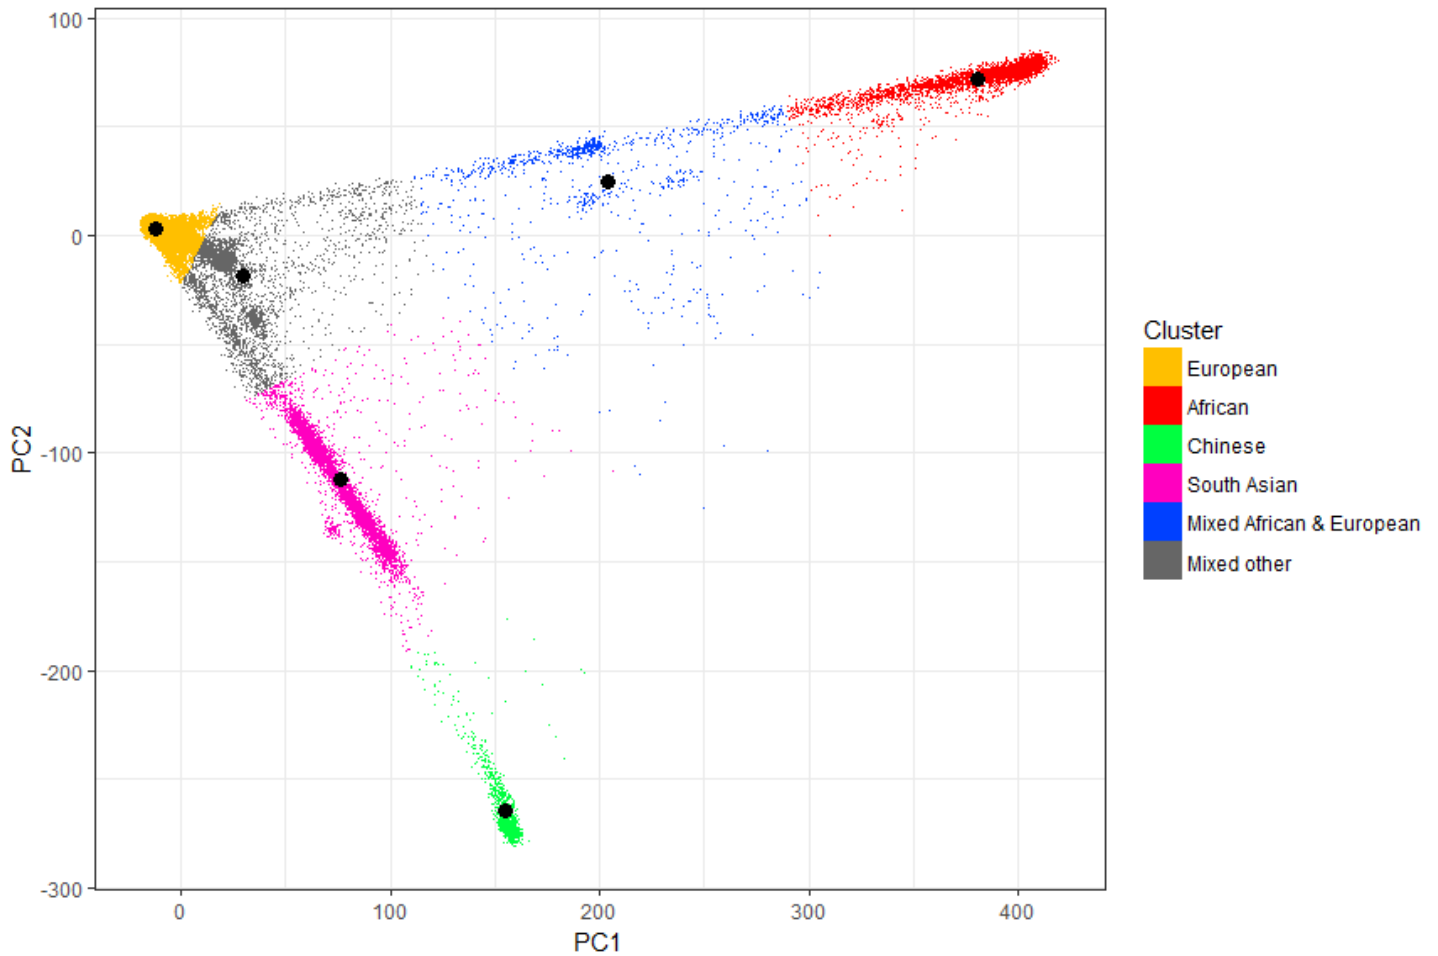

535 B) Correlation between ancestry groups derived from K-means clustering and self-reported ethnicity; the numbers of samples in each K-means cluster (y-axis) with each self-reported ethnicity (x-axis) are shown.

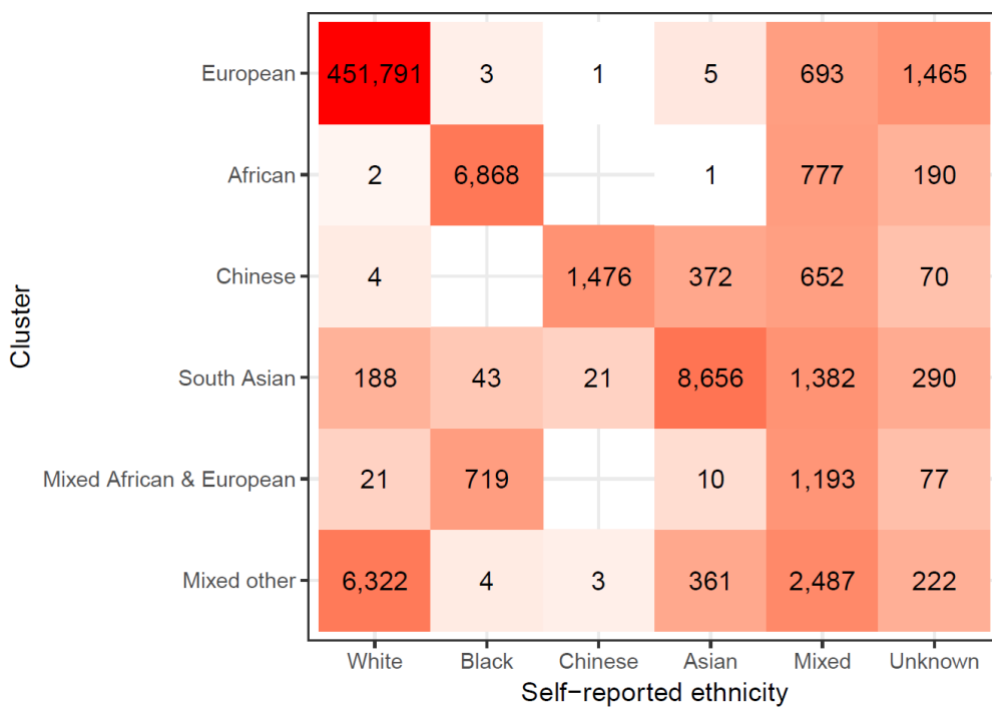

538 **Supplementary Figure 2: Manhattan plots**

539 A) FEV<sub>1</sub> novel tier 1 signals. P values from UK Biobank with  $P=5 \times 10^{-9}$  (Tier 1 UK Biobank threshold) shown in red.

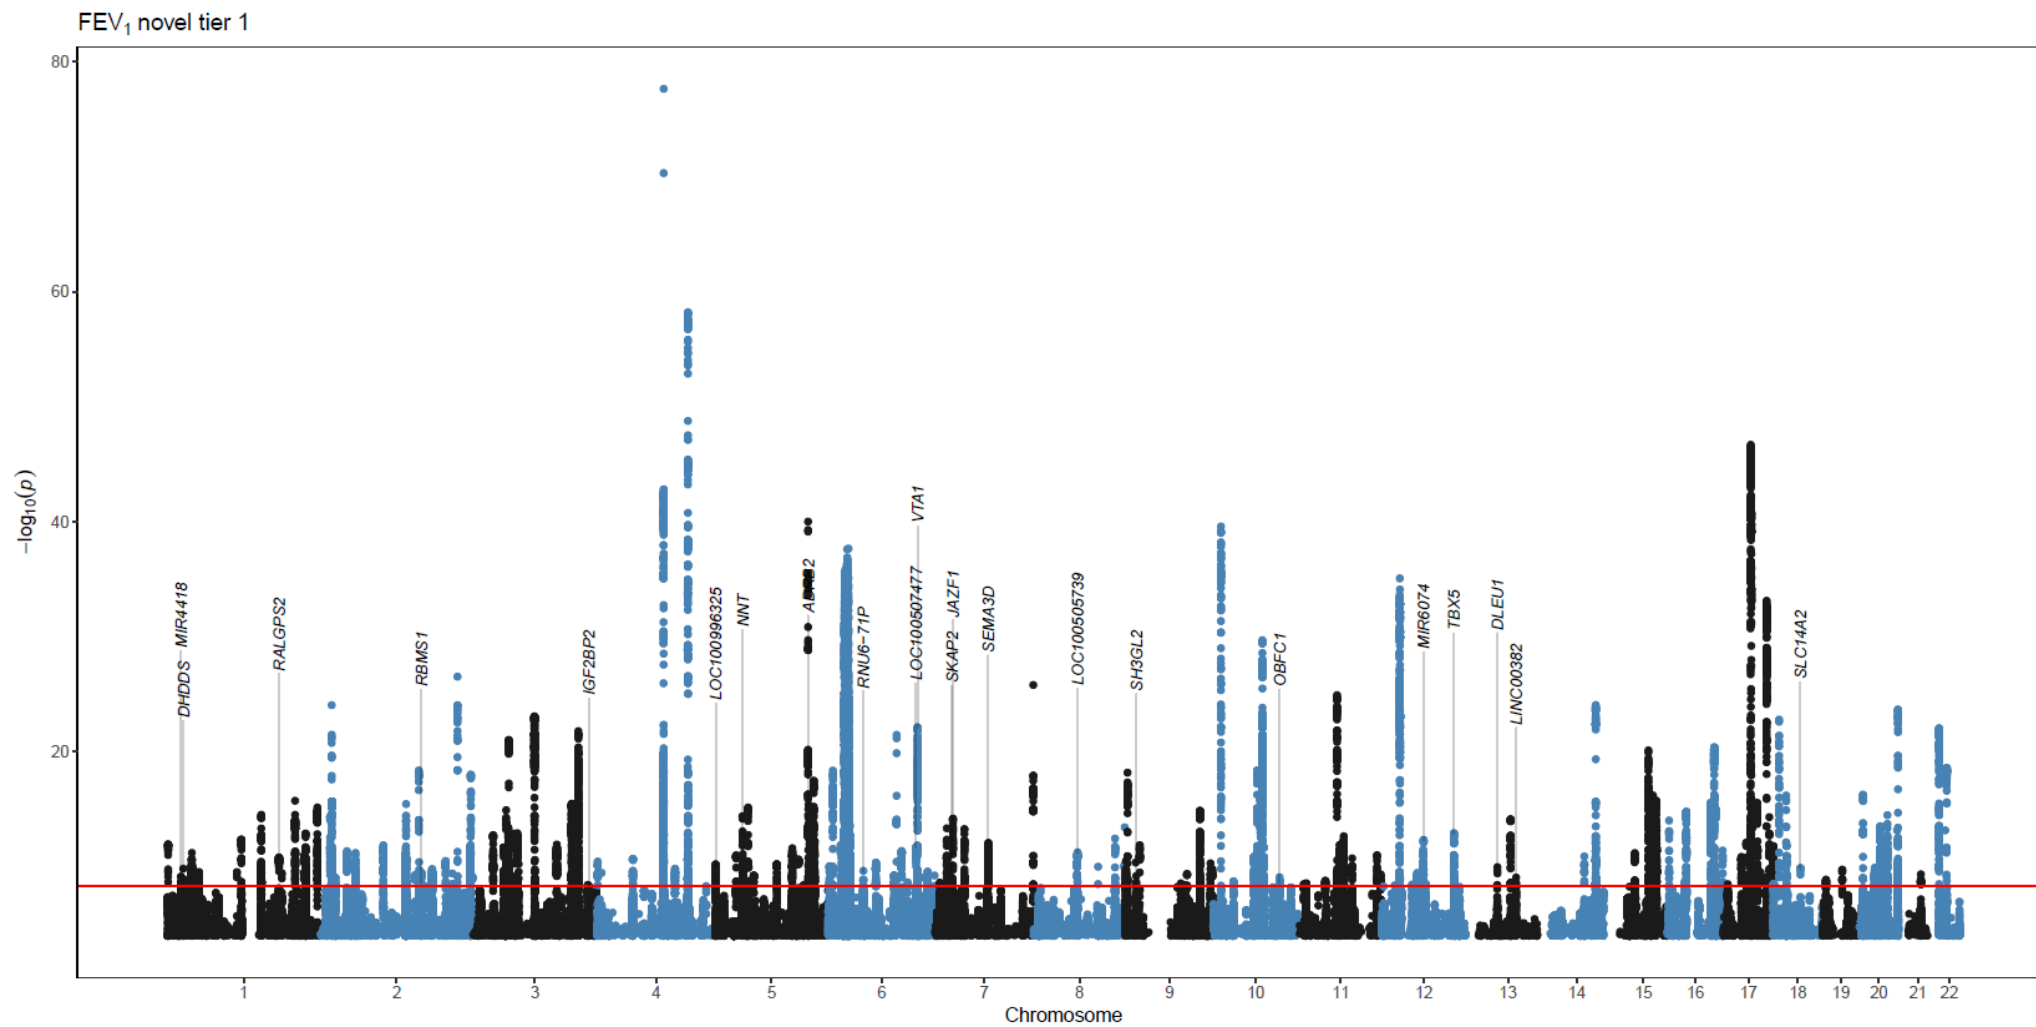

540



541 B) FEV<sub>1</sub> novel tier 2 signals. P values from meta-analysis of UK Biobank and SpiroMeta with  $P=5 \times 10^{-9}$  (Tier 2 meta-analysis threshold) shown in red.

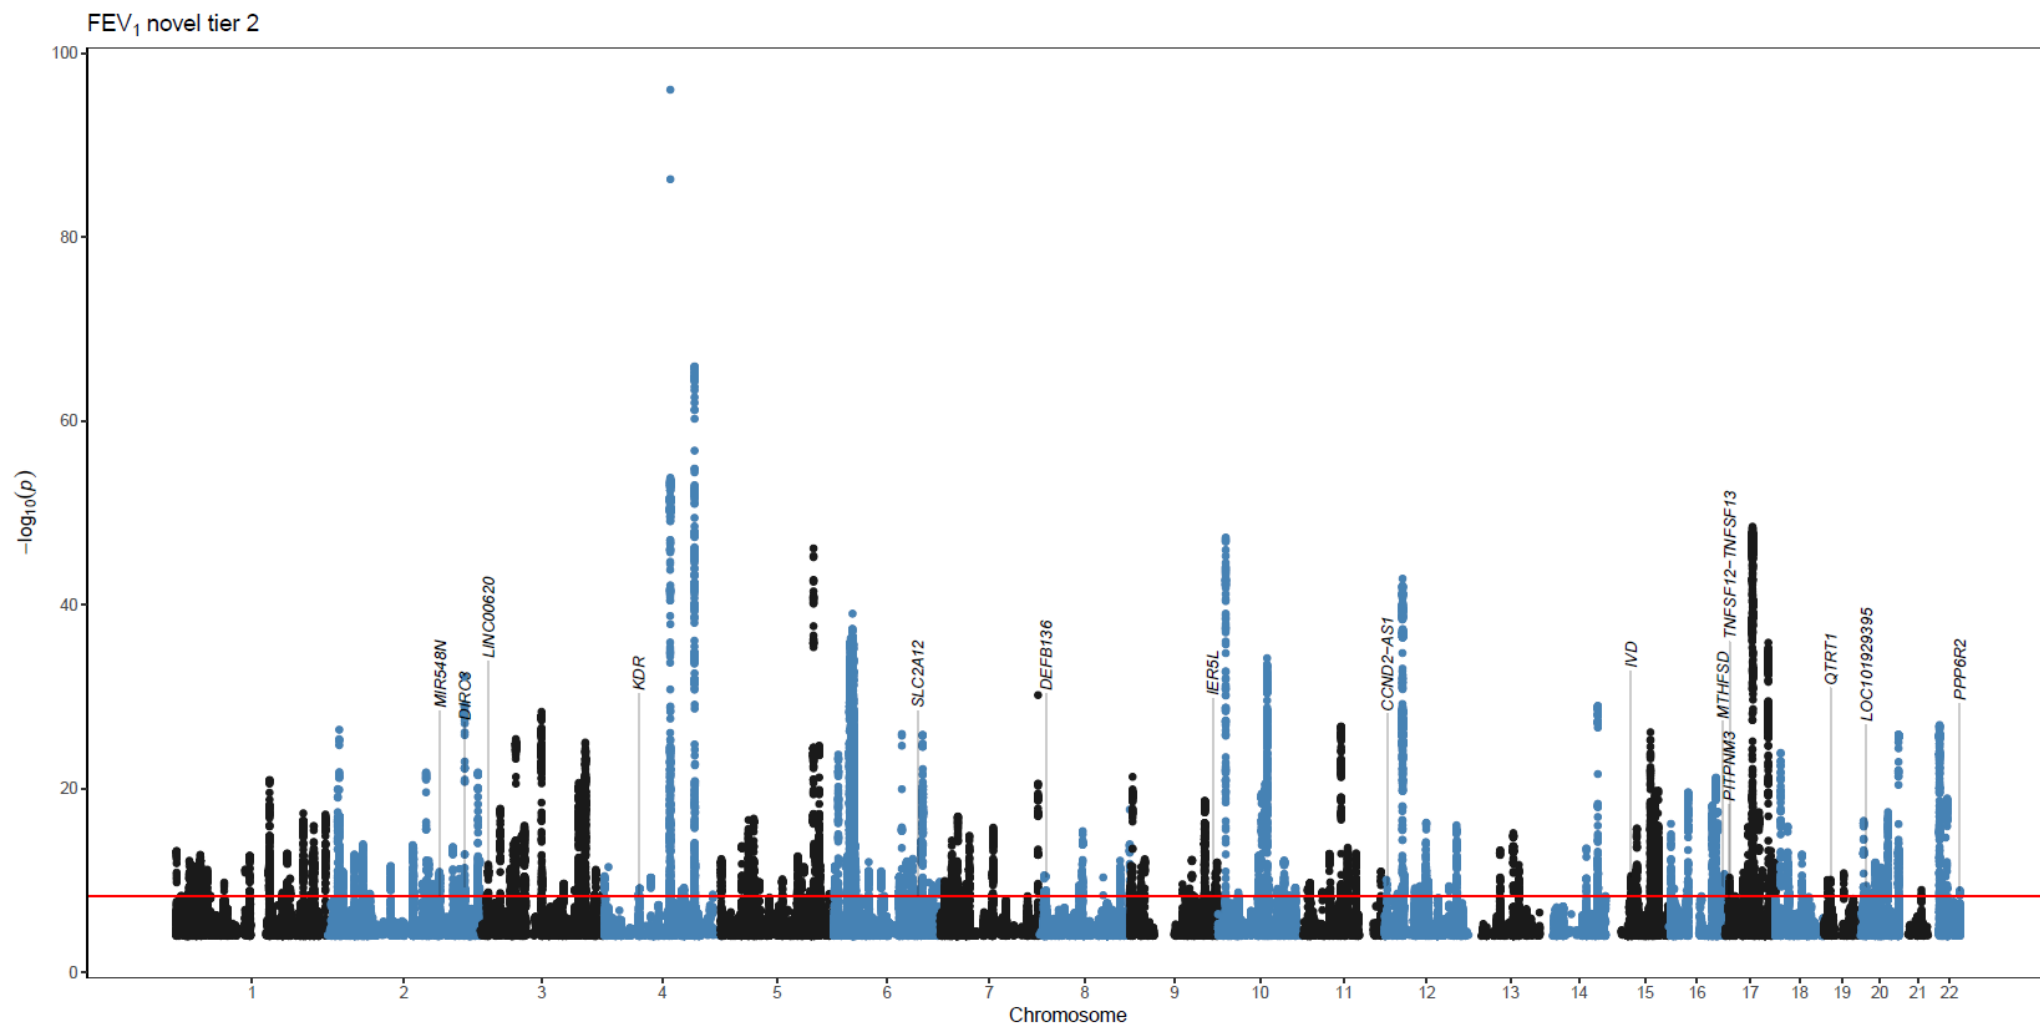

542

543 C) FEV<sub>1</sub> previously reported signals. P values from UK Biobank with  $P=10^{-5}$  (threshold for inclusion of previously reported signals in downstream analyses) shown in red.

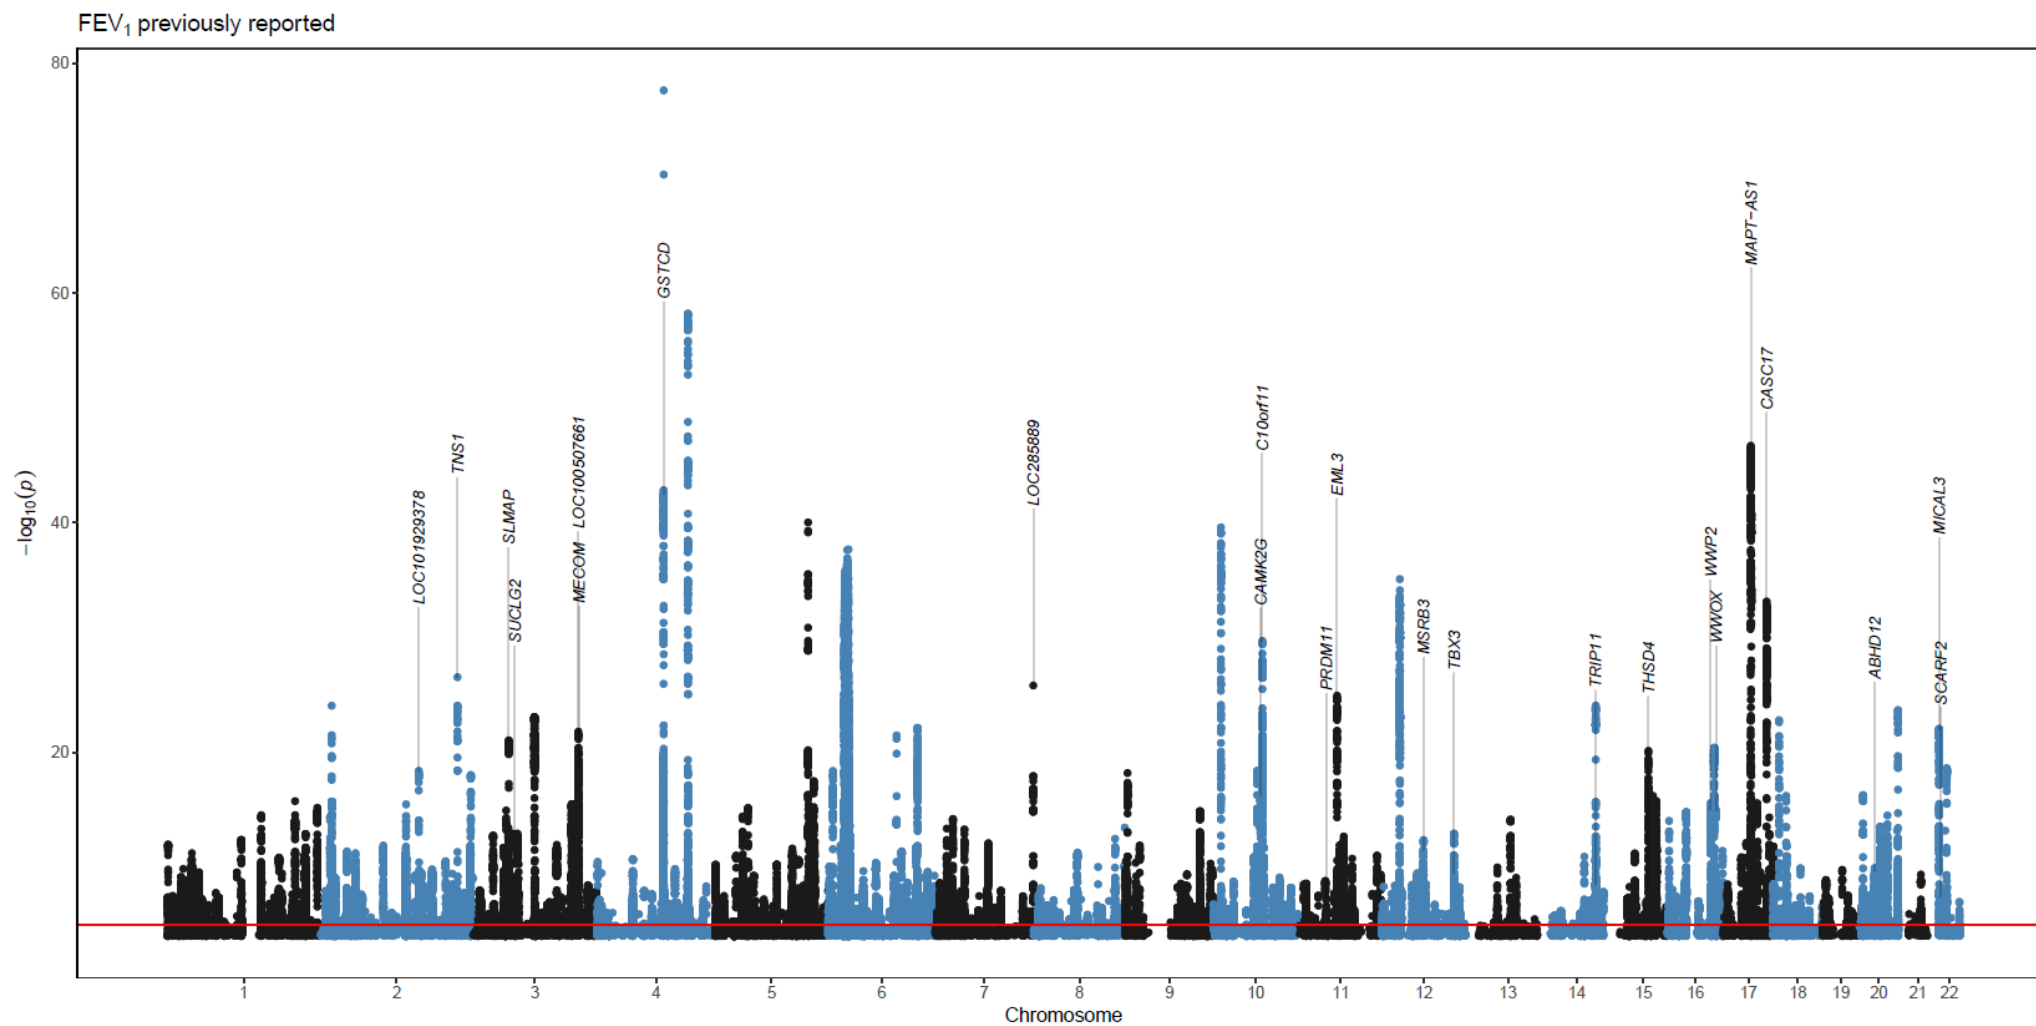

545 D) FVC novel tier 1 signals. P values from UK Biobank with  $P=5 \times 10^{-9}$  (Tier 1 UK Biobank threshold) shown in red.

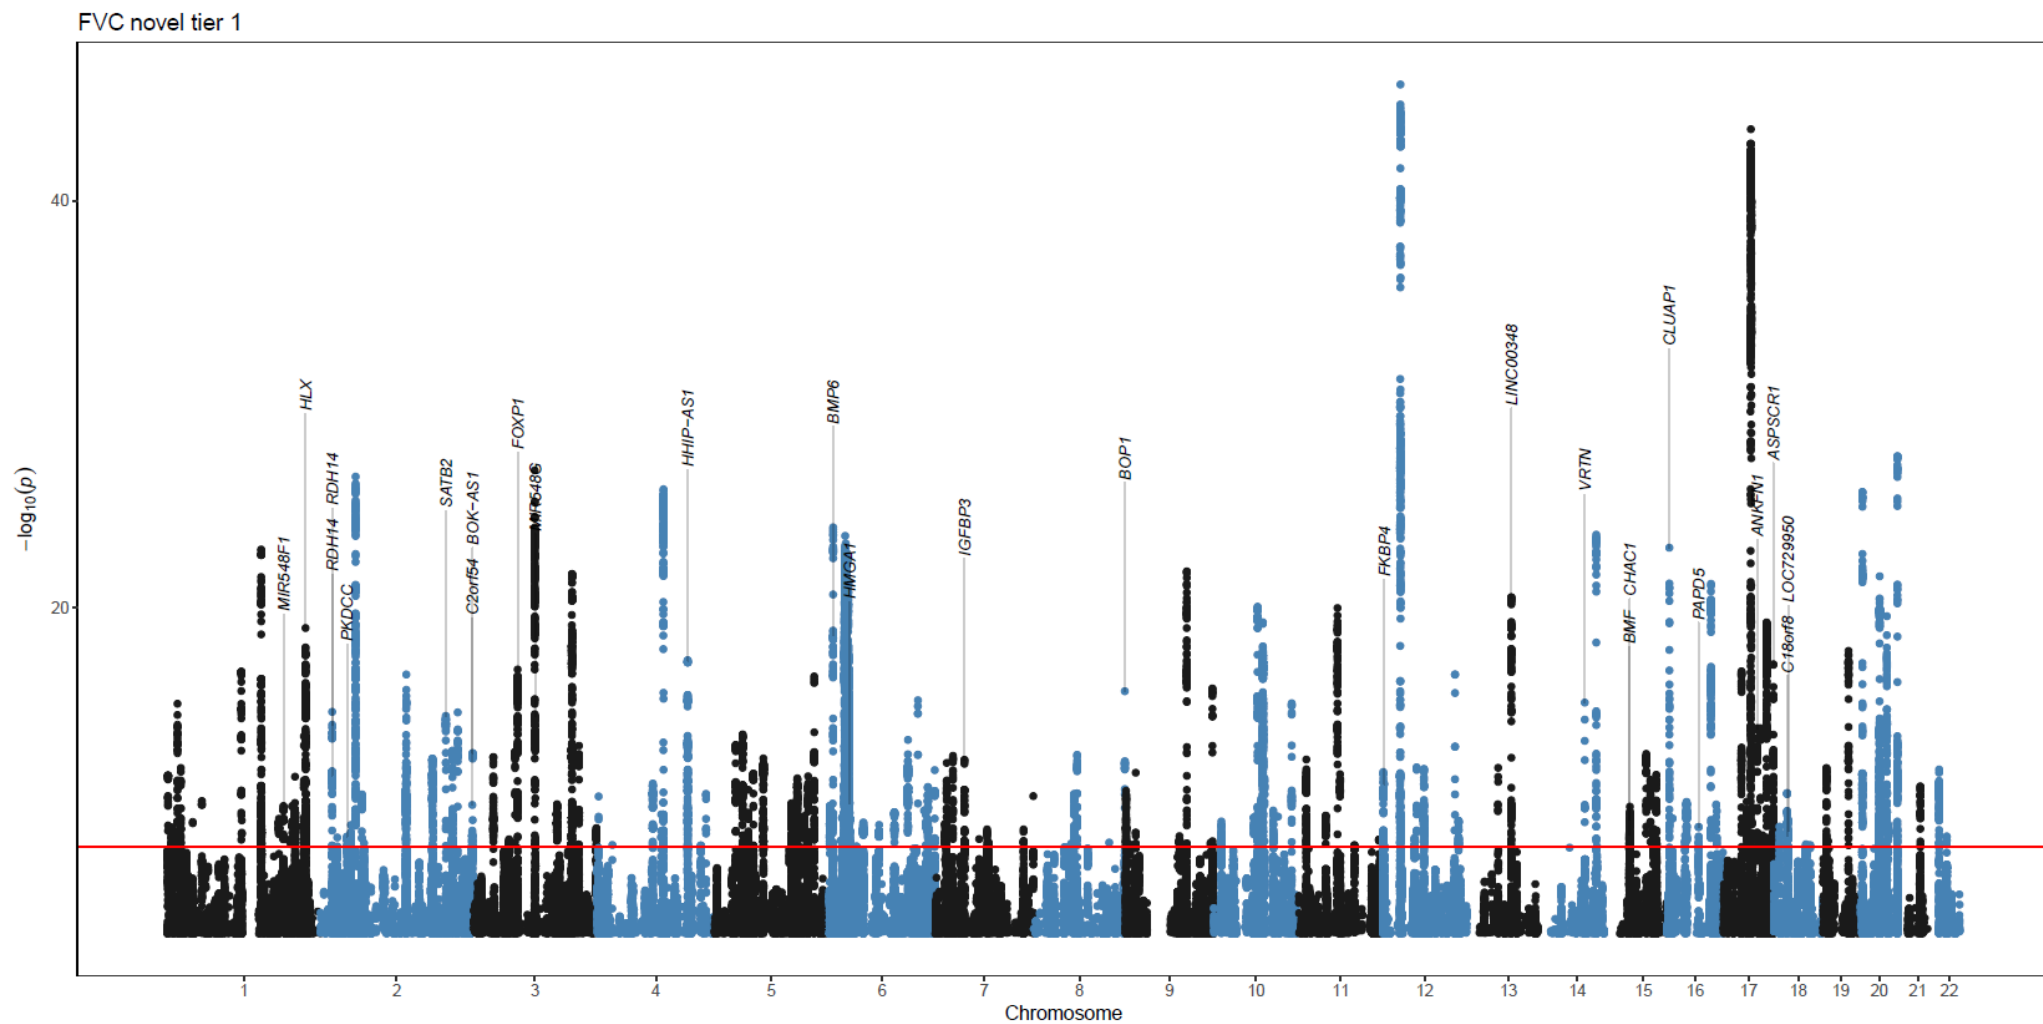

547 E) FVC novel tier 2 signals. P values from meta-analysis of UK Biobank and SpiroMeta with  $P=5 \times 10^{-9}$  (Tier 2 meta-analysis threshold) shown in red.

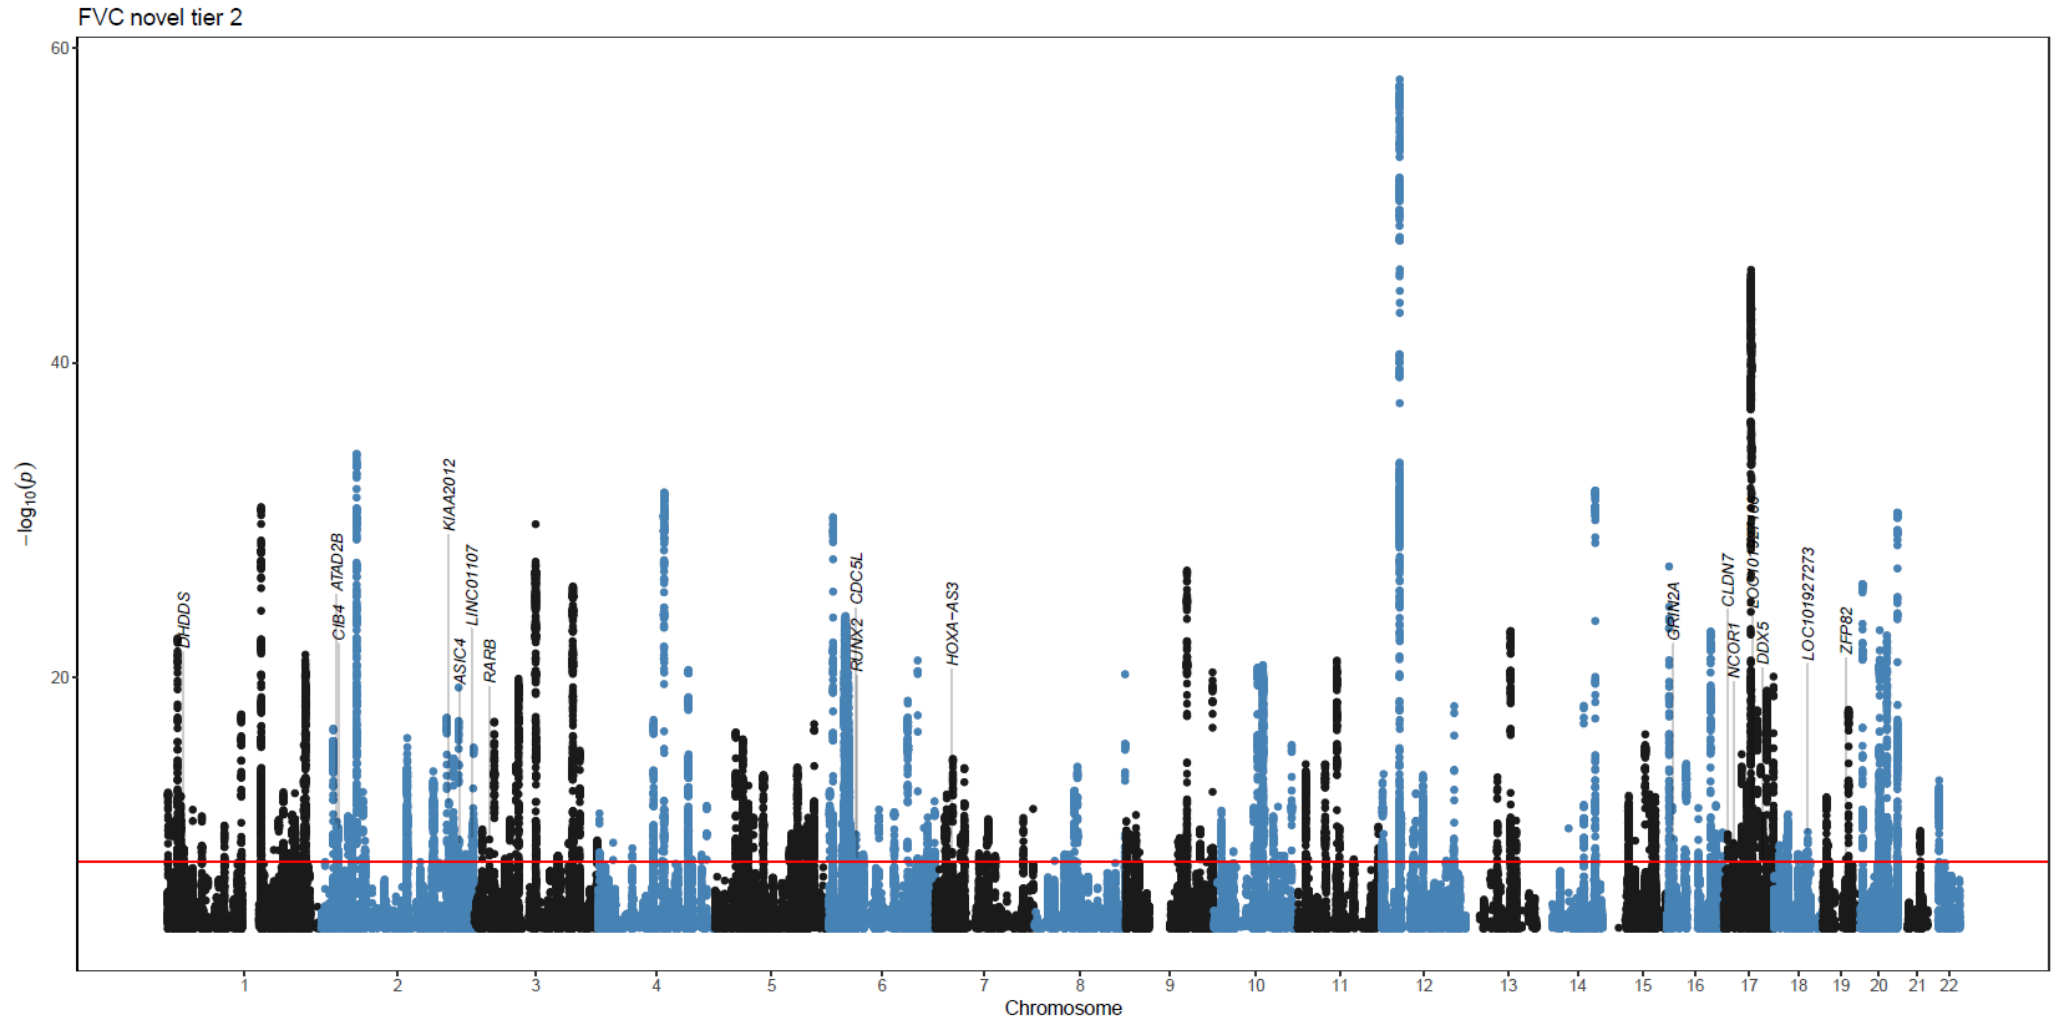

548

549 F) FVC previously reported signals. P values from UK Biobank with  $P=10^{-5}$  (threshold for inclusion of previously reported signals in downstream analyses) shown in red.

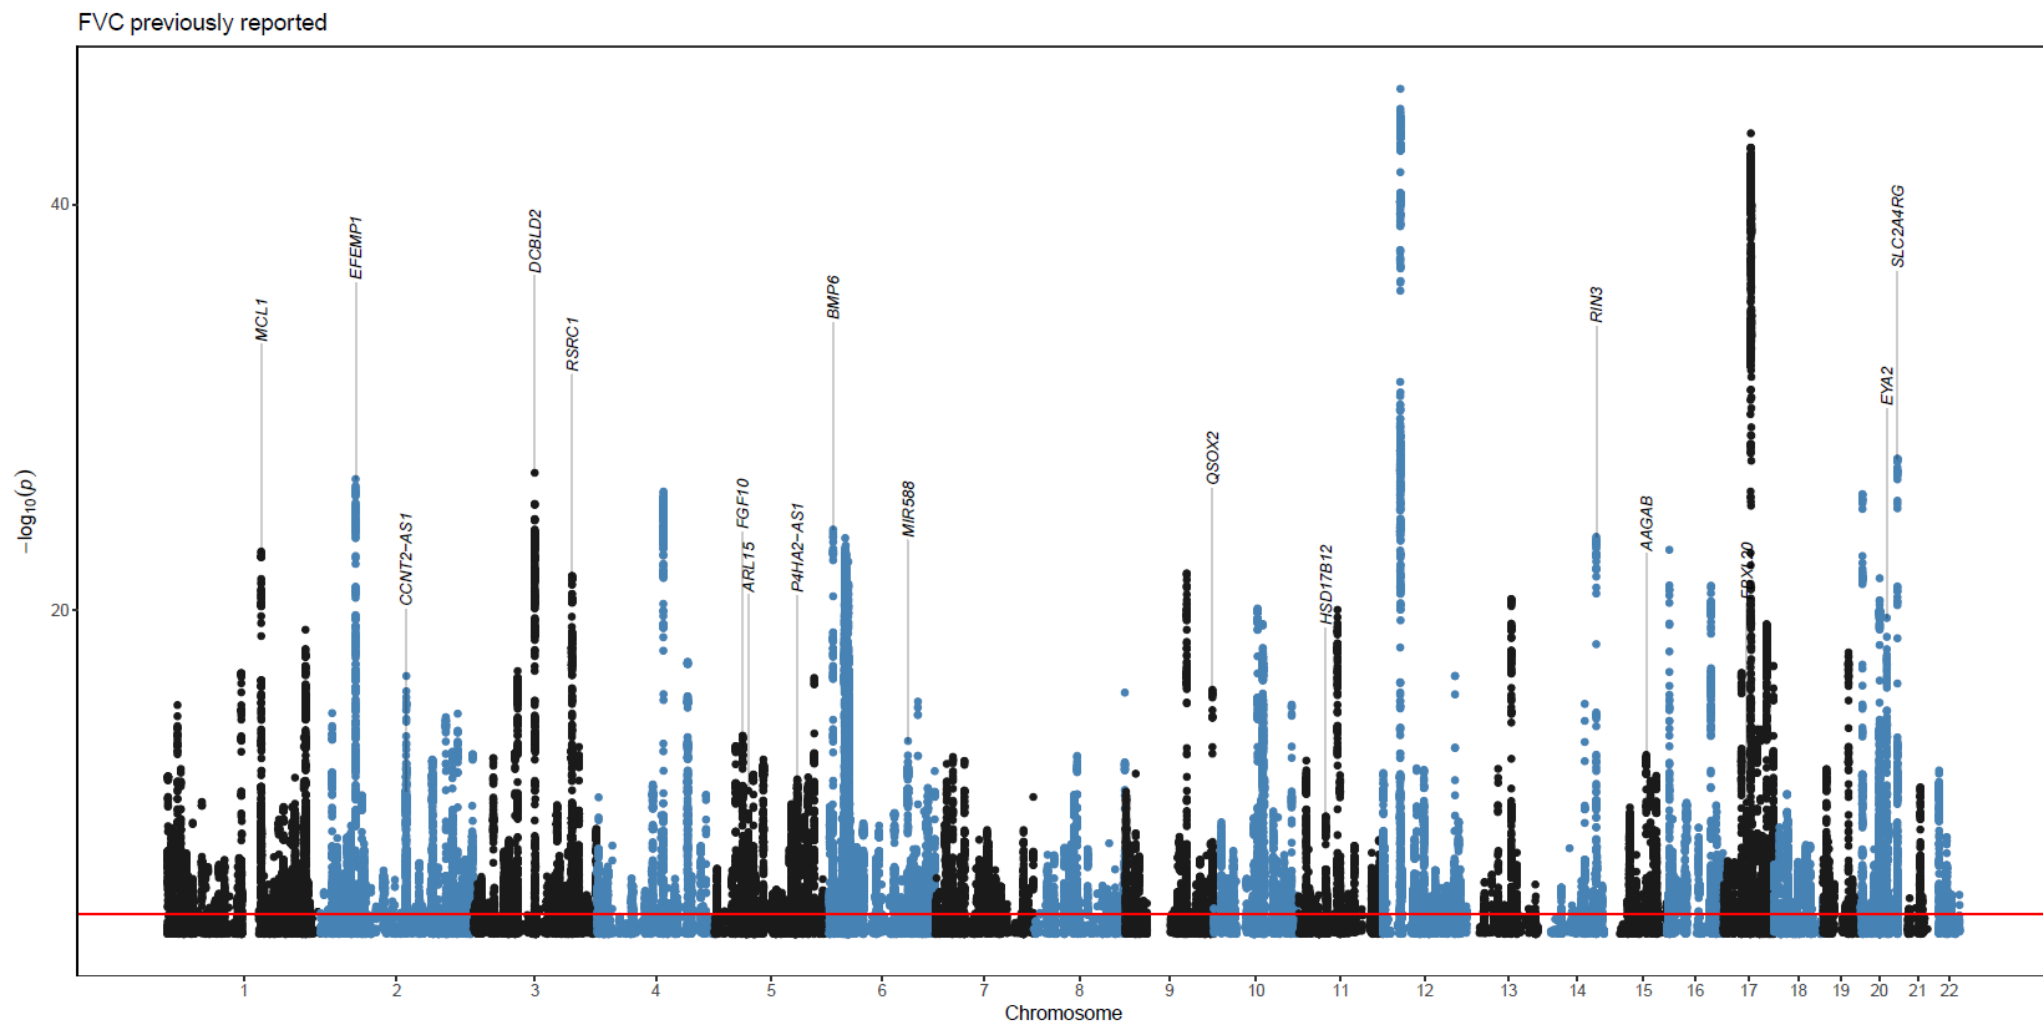

550

551 G) FEV<sub>1</sub>/FVC novel tier 1 signals. P values from UK Biobank with  $P=5 \times 10^{-9}$  (Tier 1 UK Biobank threshold) shown in red.

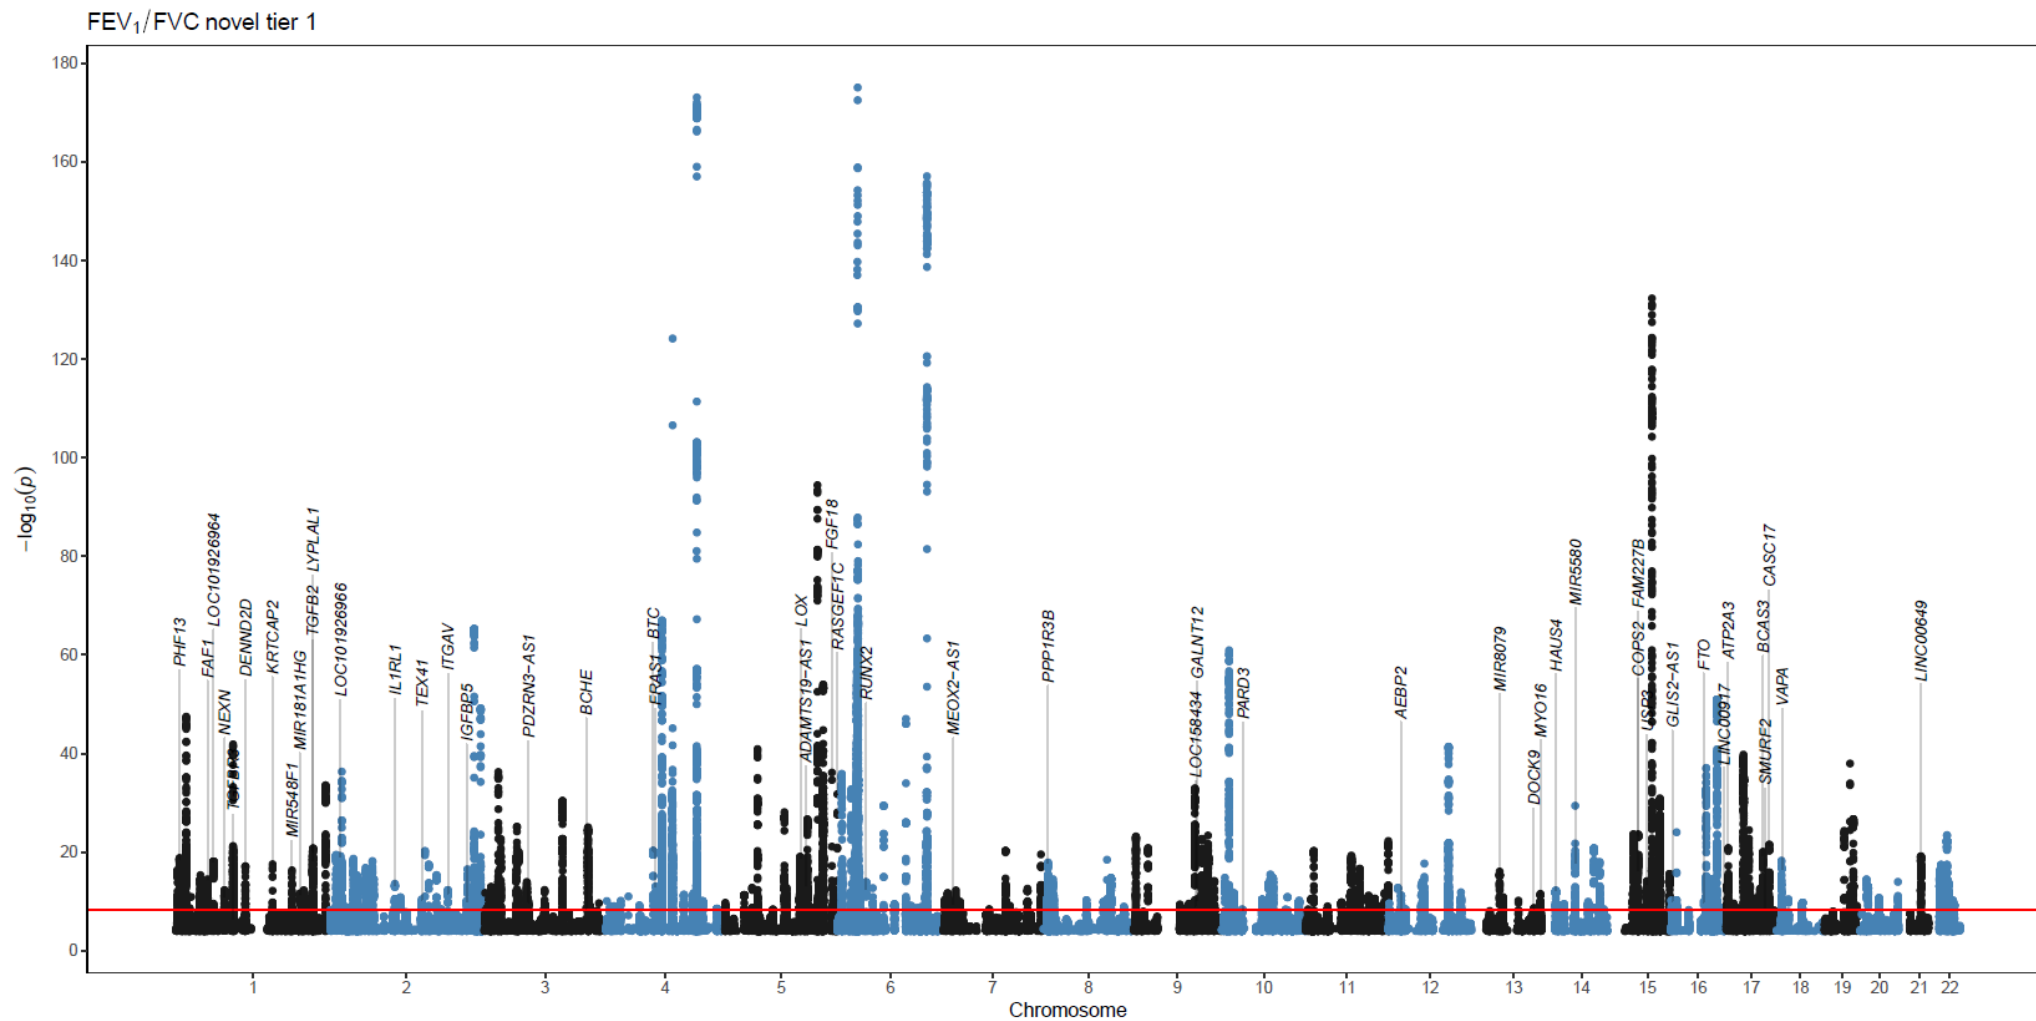

552

553 H) FEV<sub>1</sub>/FVC novel tier 2 signals. P values from meta-analysis of UK Biobank and SpiroMeta with  $P=5 \times 10^{-9}$  (Tier 2 meta-analysis threshold) shown in red.

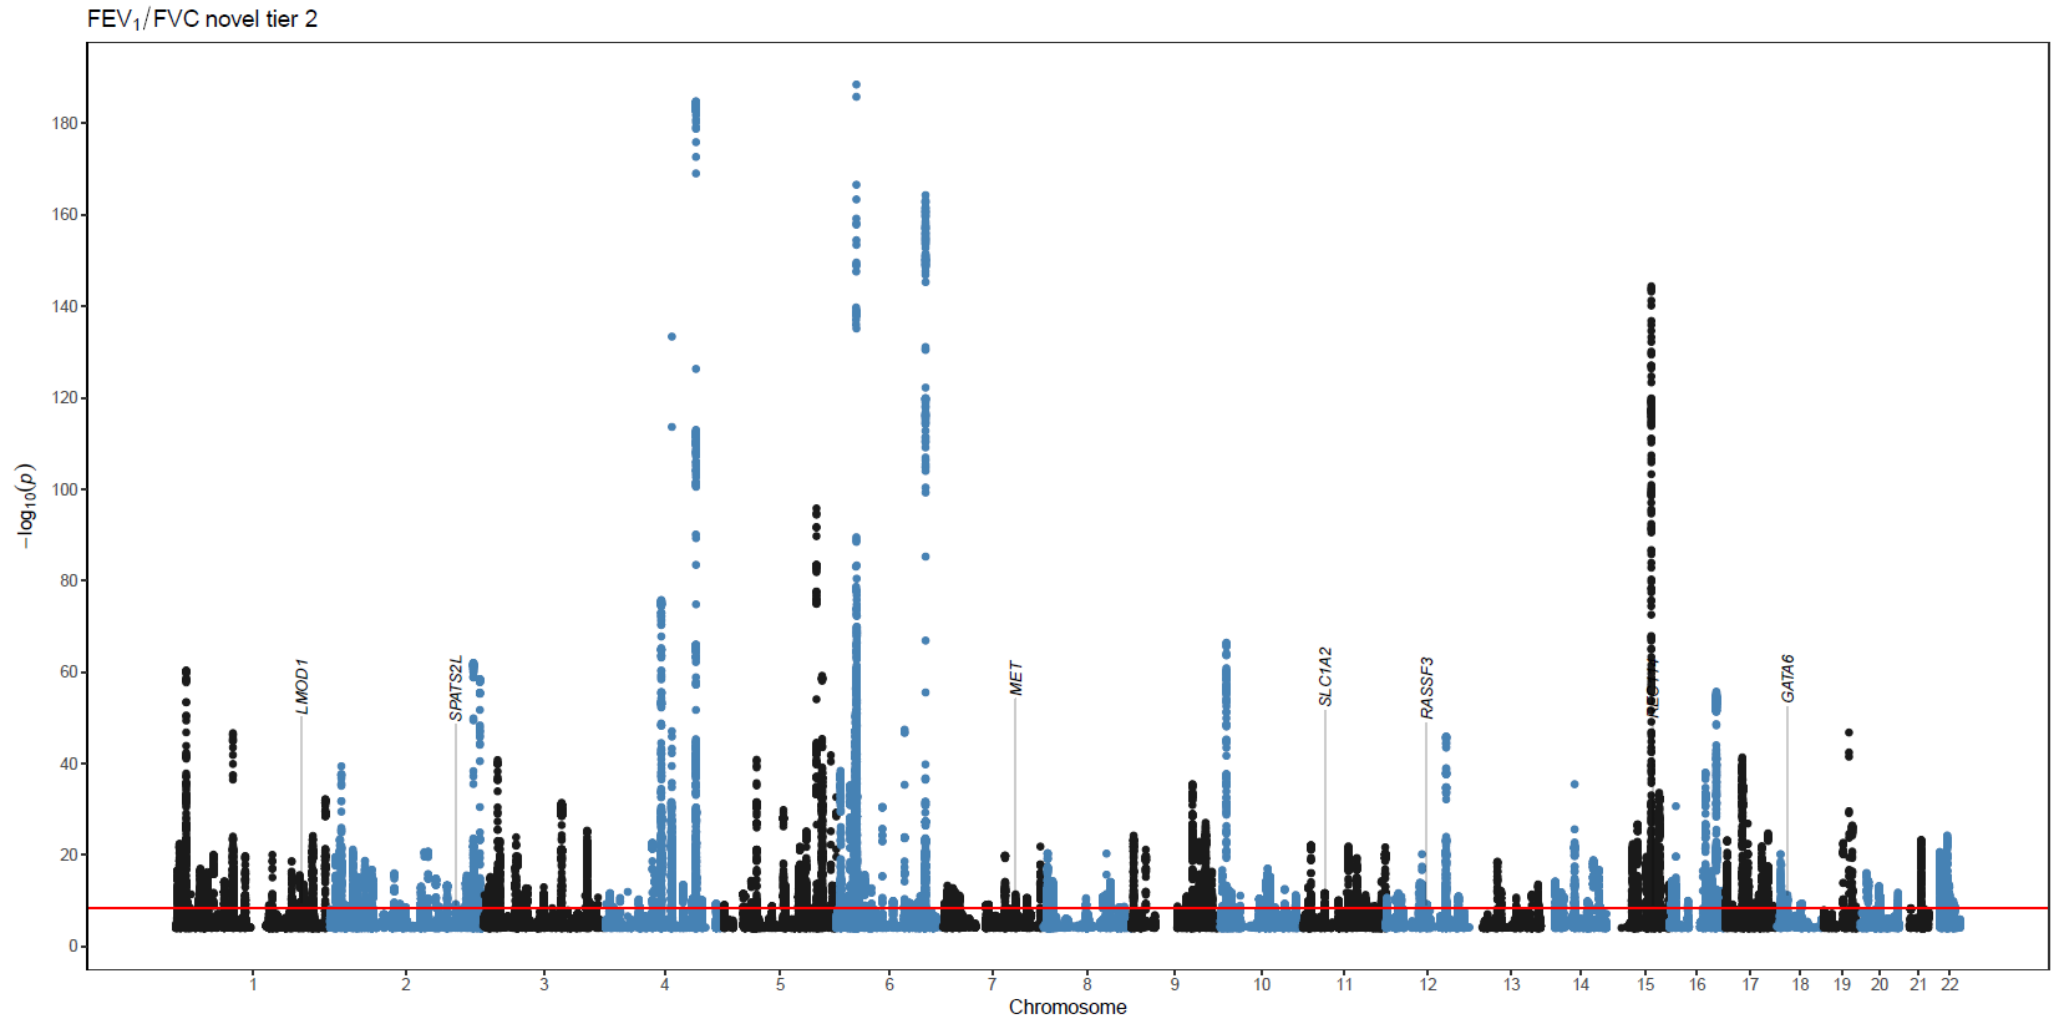

554

555 I) FEV<sub>1</sub>/FVC previously reported signals. P values from UK Biobank with  $P=10^{-5}$  (threshold for inclusion of previously reported signals in downstream analyses) in red.

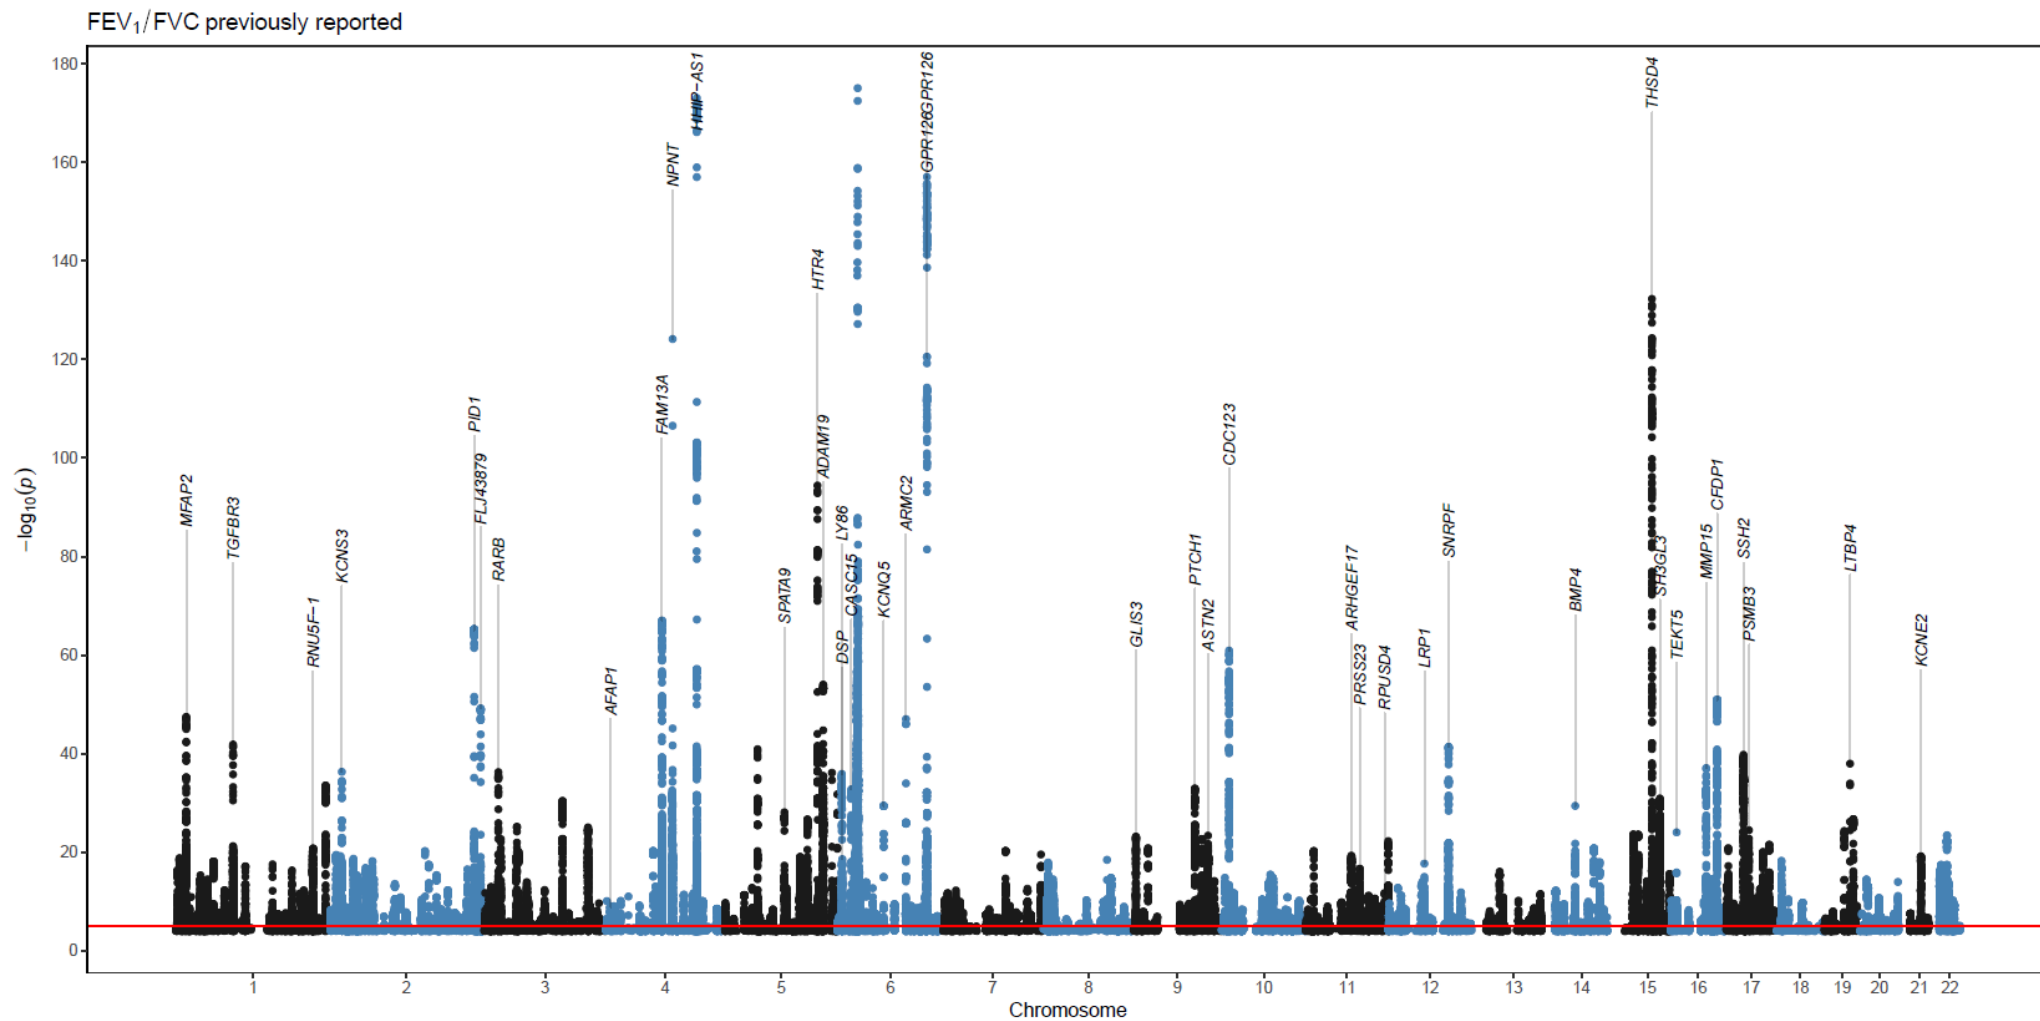



557 J) PEF novel tier 1 signals. P values from UK Biobank with  $P=5 \times 10^{-9}$  (Tier 1 UK Biobank threshold) shown in red.

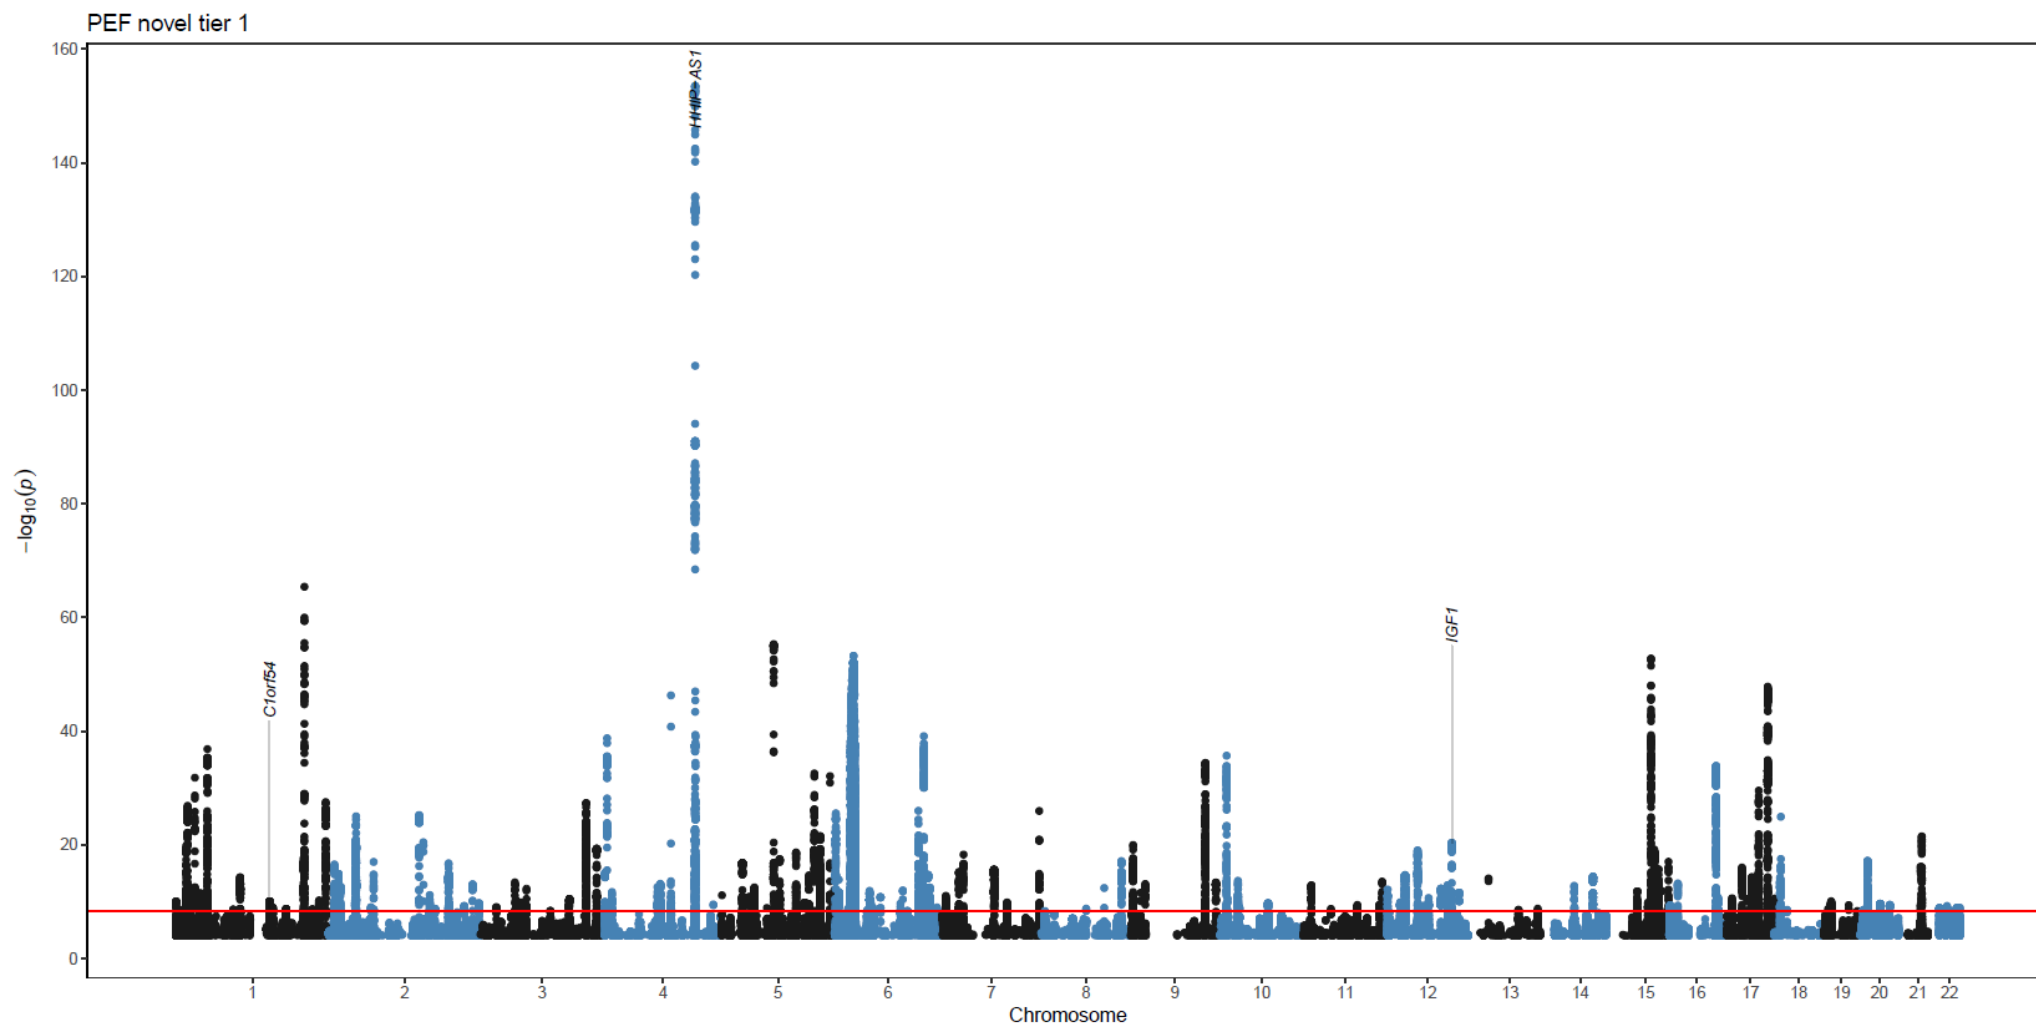

559 K) PEF novel tier 2 signals. P values from meta-analysis of UK Biobank and SpiroMeta with  $P=5 \times 10^{-9}$  (Tier 2 meta-analysis threshold) shown in red.

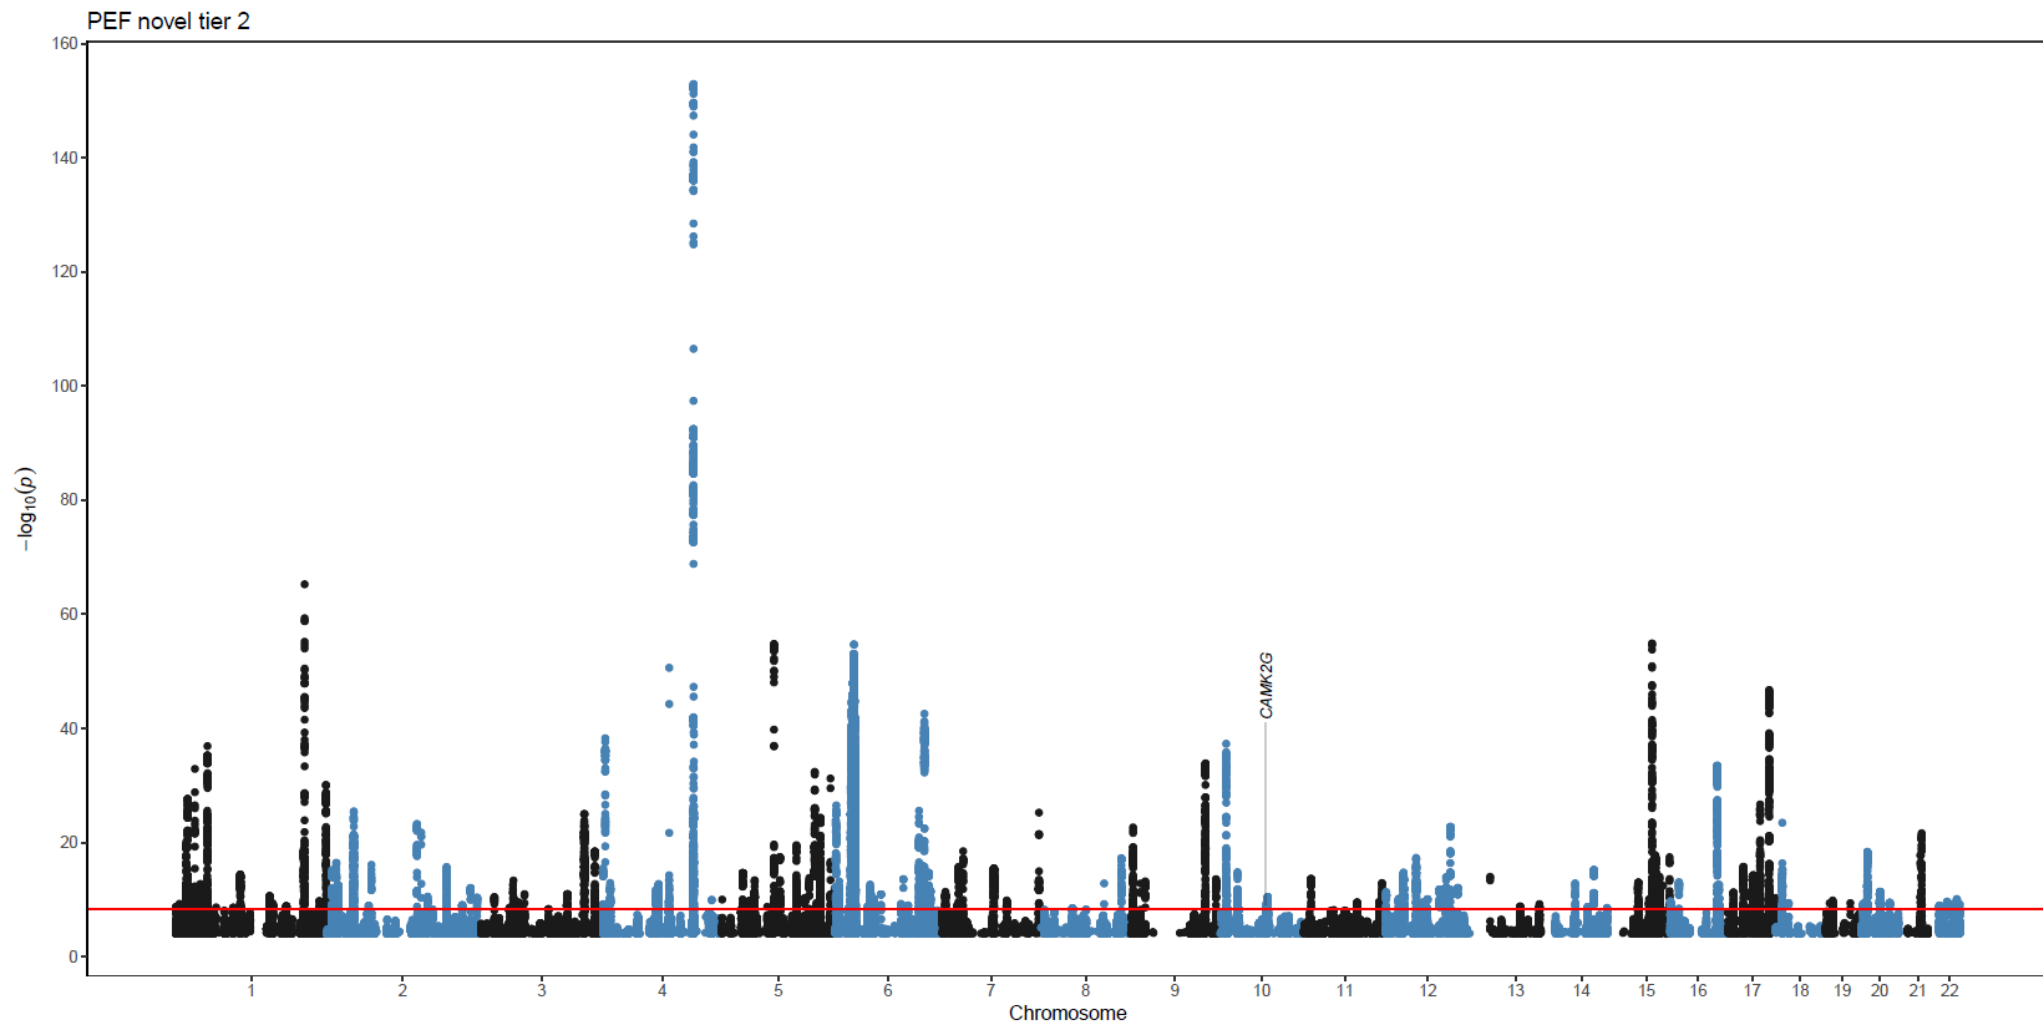

560

561 L) PEF previously reported signals. P values from UK Biobank with  $P=10^{-5}$  (threshold for inclusion of previously reported signals in downstream analyses) in red.

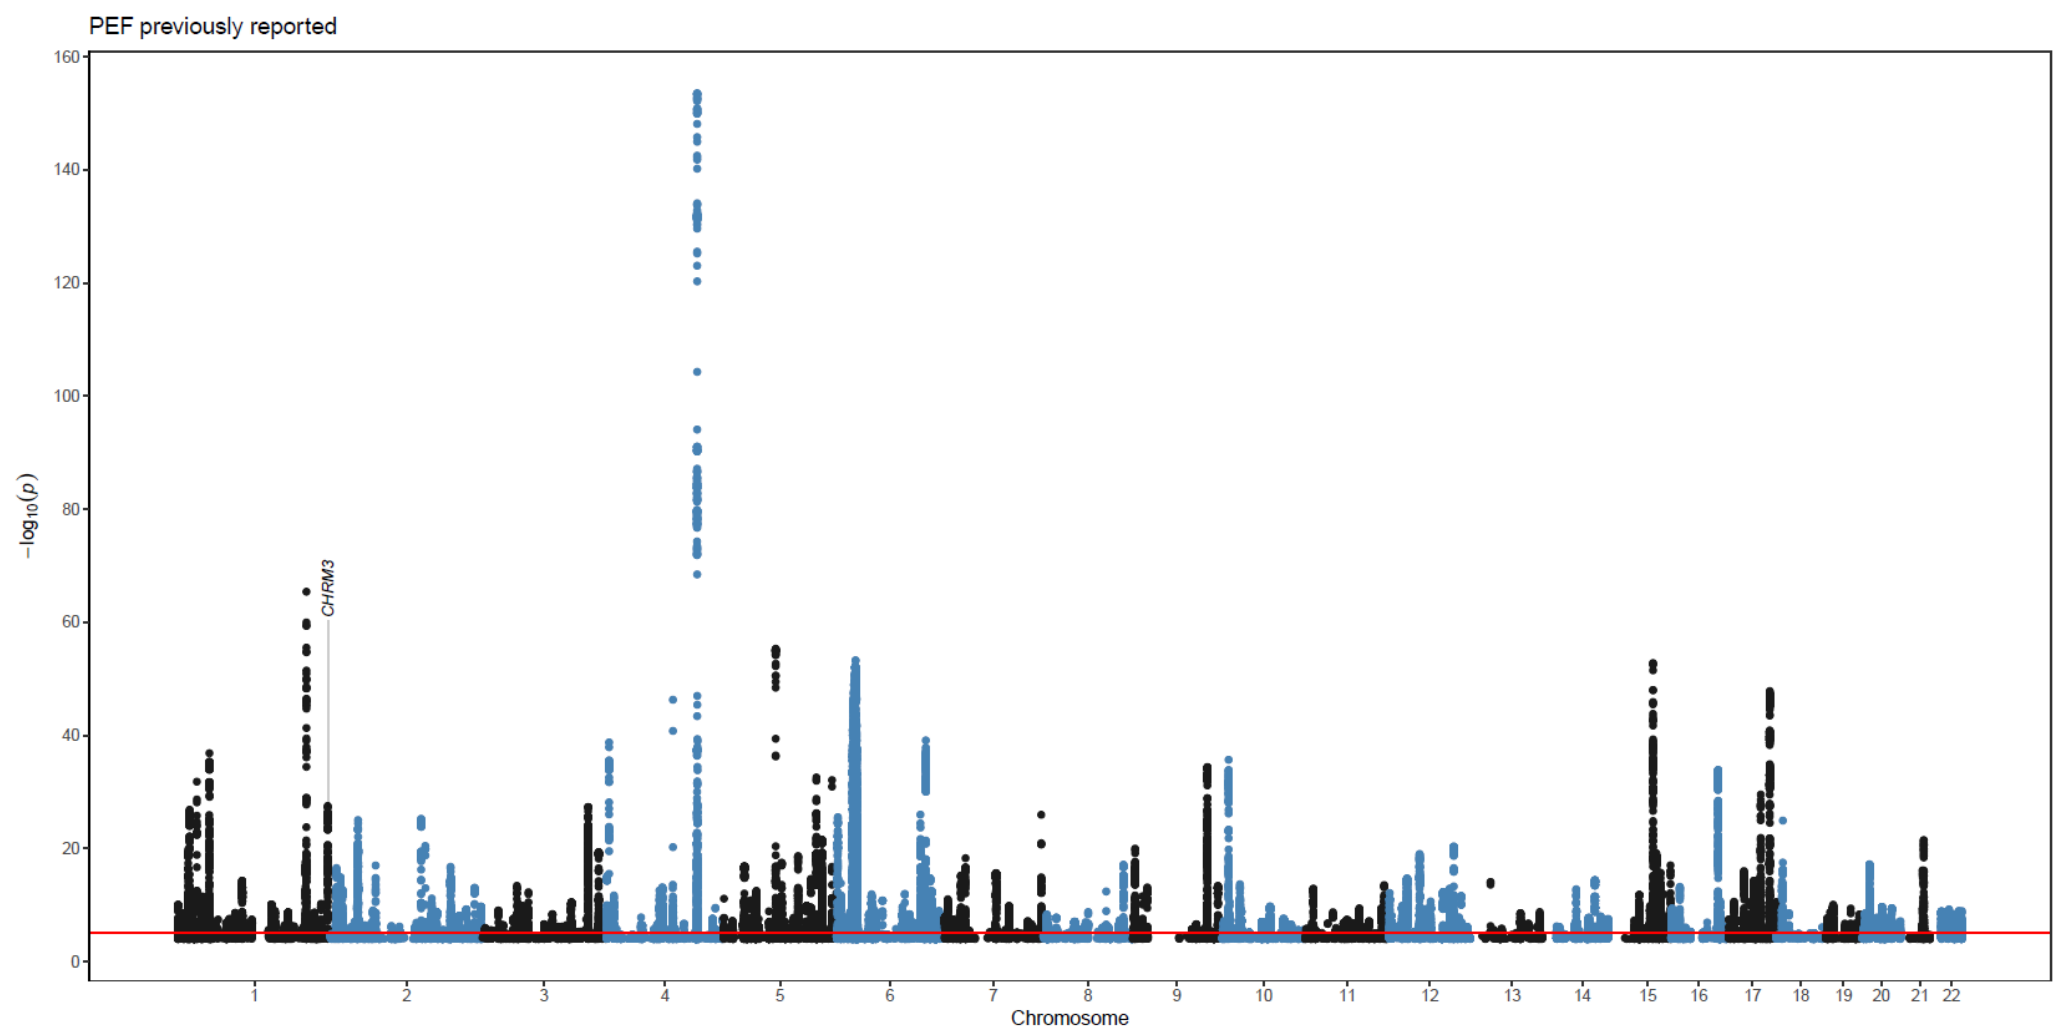

562

563

564 **Supplementary Figure 3: Assessment of previously reported signals**

565 Description of assessment of 184 signals for lung function or COPD previously reported in the literature. Signals were pruned for independence, leaving 157 signals.

566 Corroboration of association was found for 142/157 signals. 2/142 signals were known to be associated with smoking behaviour, and in the current study, we replicated  
567 these findings, and also showed no association in non-smokers. After removing these signals, 140 remained for assessment. After combining with 139 novel signals, 279  
568 signals entered downstream analyses.

569 \*=Wilk *et al.* 2009 [PMID: 19300500];<sup>35</sup> Hancock *et al.* 2010 [PMID: 20010835];<sup>36</sup> Repapi *et al.* 2010 [PMID: 20010834];<sup>37</sup> Soler Artigas *et al.* 2011 [PMID: 21946350];<sup>38</sup> Cho *et al.*  
570 *al.* 2012 [PMID: 22080838];<sup>39</sup> Loth *et al.* 2014 [PMID: 24929828];<sup>40</sup> Lutz *et al.* 2015 [PMID: 26634245];<sup>41</sup> Soler Artigas *et al.* 2015 [PMID: 21946350];<sup>42</sup> Wain *et al.* 2015  
571 [PMID: 28166213];<sup>2</sup> Hobbs *et al.* 2016 [PMID: 26771213];<sup>43</sup> Hobbs *et al.* 2017 [PMID: 28166215];<sup>44</sup> Wain *et al.* 2017 [PMID: 26423011];<sup>45</sup> Wyss *et al.* 2017  
572 [<https://www.biorxiv.org/content/early/2017/10/05/196048>]<sup>46</sup>; Jackson *et al.* 2018 [<https://wellcomeopenresearch.org/articles/3-4/v1>];<sup>47</sup>

573 \*\*=Wyss *et al.* 2017 [<https://www.biorxiv.org/content/early/2017/10/05/196048>]<sup>46</sup>

574 †=See Wain *et al.* 2017 [PMID: 28166213] for details of HLA independence analysis.<sup>45</sup>

575 ‡=Lutz *et al.* 2015 [PMID: 26634245];<sup>41</sup> Cho *et al.* 2012 [PMID: 22080838]<sup>39</sup>

576 Figure on next page.

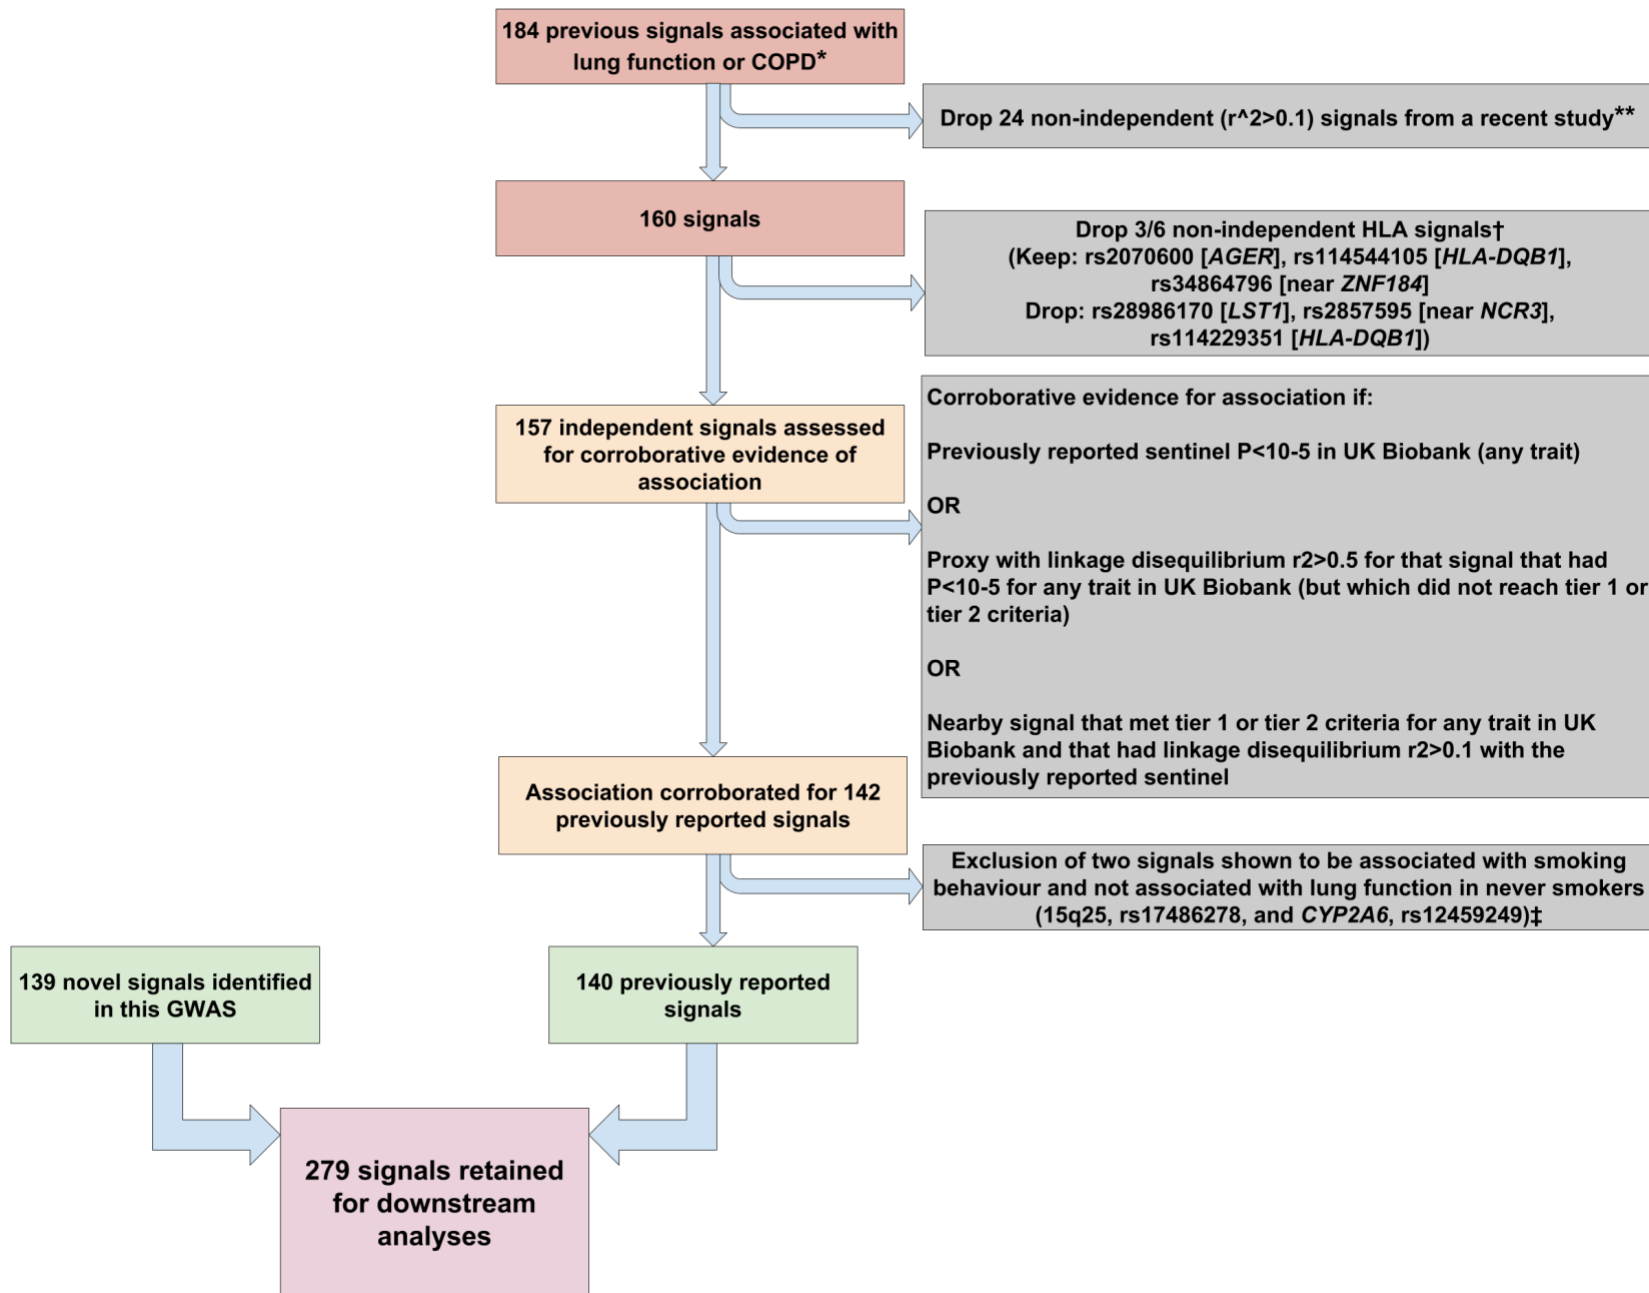

578 **Supplementary Figure 4: Tissue-specific enrichment of overlap with DNase I hotspots**

579 Tissue-specific enrichment of overlap for the 279 SNPs for each DNase I hotspot sample in the RoadMap Epigenome project (n=299) and ENCODE project (n=125). Each  
580 point represents the  $-\log_{10}$  binomial  $P$ -value (y axis) of the enrichment of the 279 SNPs compared to matched background SNPs on a single DNase I hotspot sample,  
581 organised by tissue as indicated by the brown labels at the top of the figure (e.g. Blood, Breast), and alphabetically by cell sample (x axis; e.g. CD3). Points with Bonferroni  
582 adjusted  $P \leq 0.01$  and  $P < 0.05$  are coloured in red and pink, respectively.

583 **RoadMap Epigenome project**

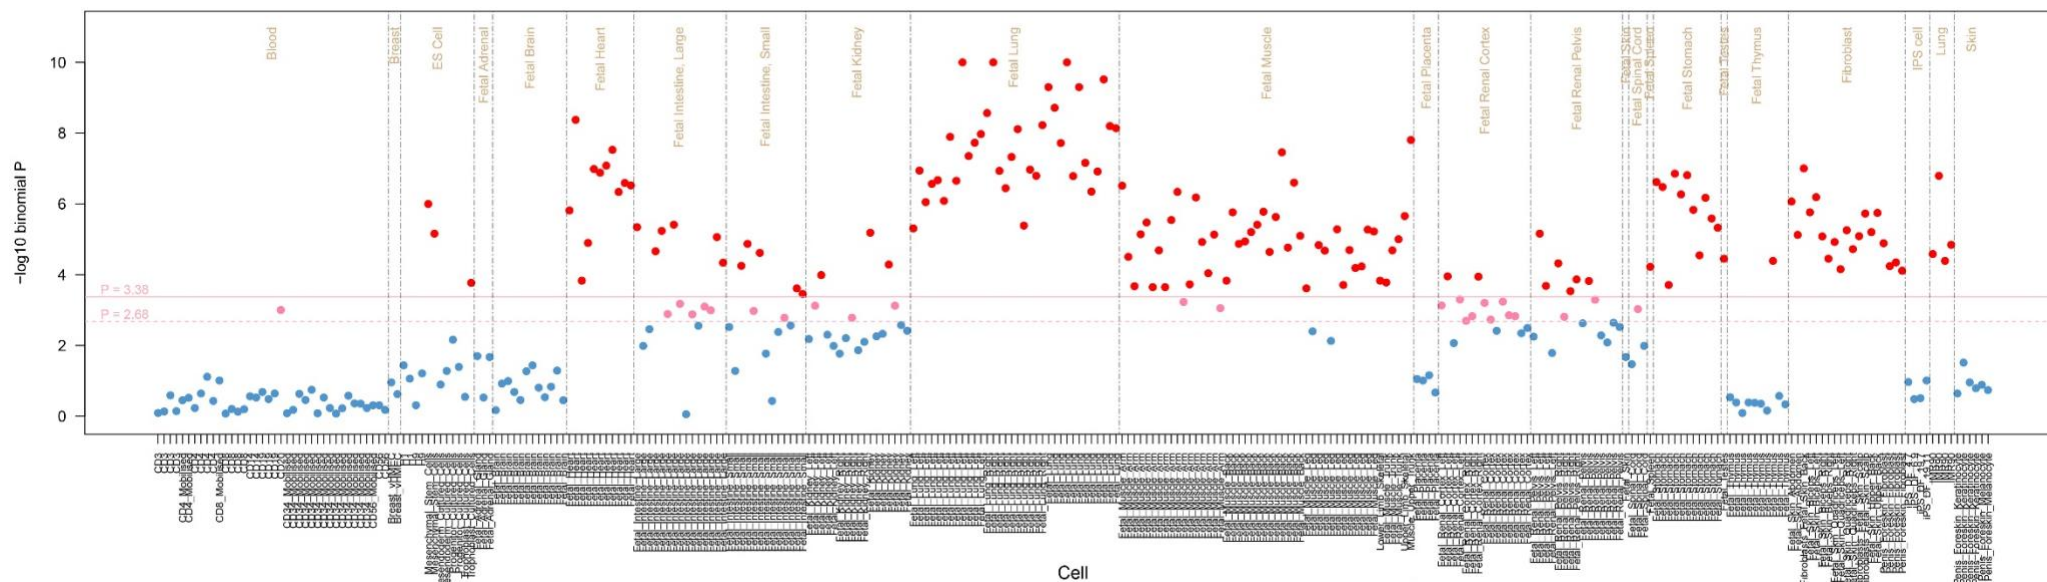

584



588 **Supplementary Figure 5: Comparison of genetic effects for height and lung function.**

589 Height effect look up in GIANT<sup>48</sup> for 247 proxies ( $r^2 > 0.4$ ) of our 276 credible set sentinel variants plotted against lung  
590 function effect in UK Biobank. All traits are rank inverse-normal transformed. There is no significant correlation  
591 (minimum P value 0.13 for FEV<sub>1</sub>/FVC).

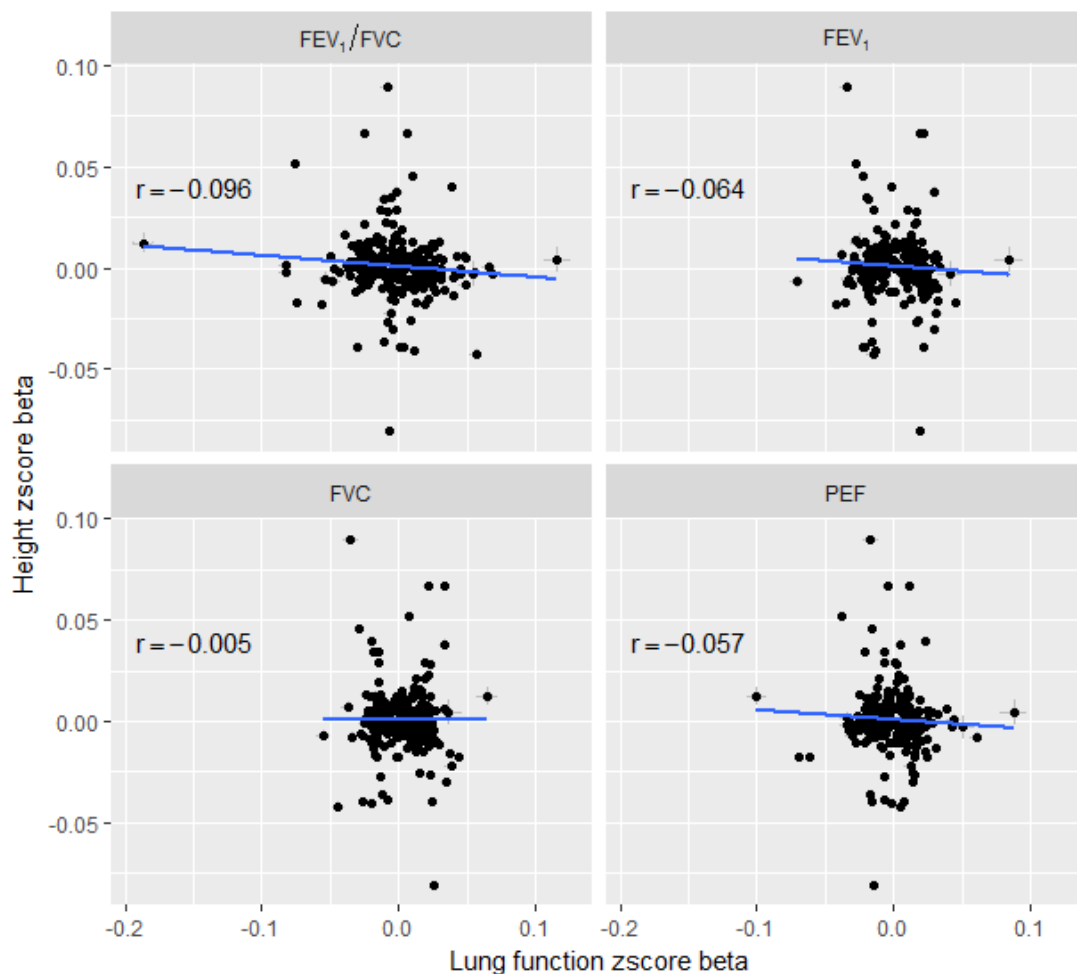

592

593 30 SNPs for which there was no proxy with  $r^2 > 0.4$  in GIANT: rs72673461, rs141942982, rs55884799, rs72902177,  
594 rs12715478, rs34712979, rs2353940, rs7733410, rs10059996, rs79898473, rs12698403, rs7838717, rs7090277,  
595 rs10998018, rs56196860, rs2812208, rs35107139, rs56383987, rs3751837, rs78442819, rs76219171, rs35420030,  
596 rs2345443, rs62070648, rs35246838, rs77672322, rs59606152, rs34093919, rs2283847, rs113111175

597



### Supplementary Figure 6: Comparison of effect sizes after excluding asthma samples

Comparison of effects (inverse-normal rank-transformed zscores) in UK Biobank for 139 novel and 140 previously reported signals in all UK Biobank samples with lung function data (x-axis, N=321,047) and after excluding 37,868 samples with doctor diagnosed asthma (y-axis, N=283,179). Doctor diagnosed asthma is self-reported touchscreen answer (UK Biobank field ID: 6152).

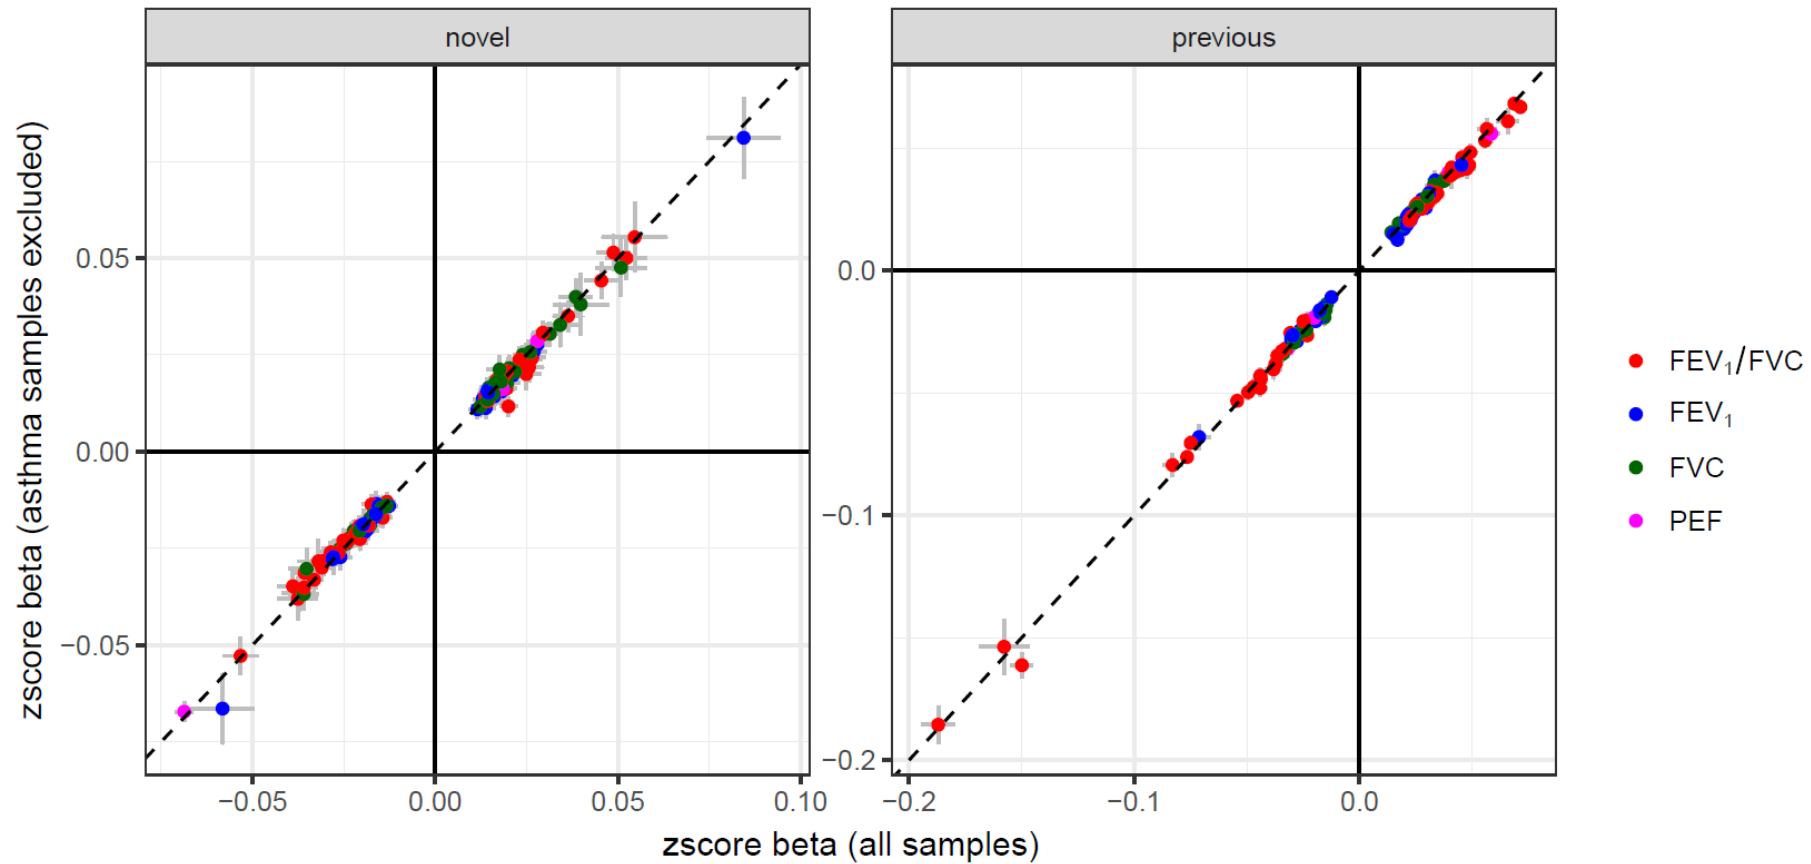

### Supplementary Figure 7: Power calculations

Power to detect a range of single variant effect sizes, as standard deviations (SDs) of the continuous lung function phenotypes (FEV<sub>1</sub>, FVC, FEV<sub>1</sub>/FVC or PEF), over a range of minor allele frequencies (MAF).

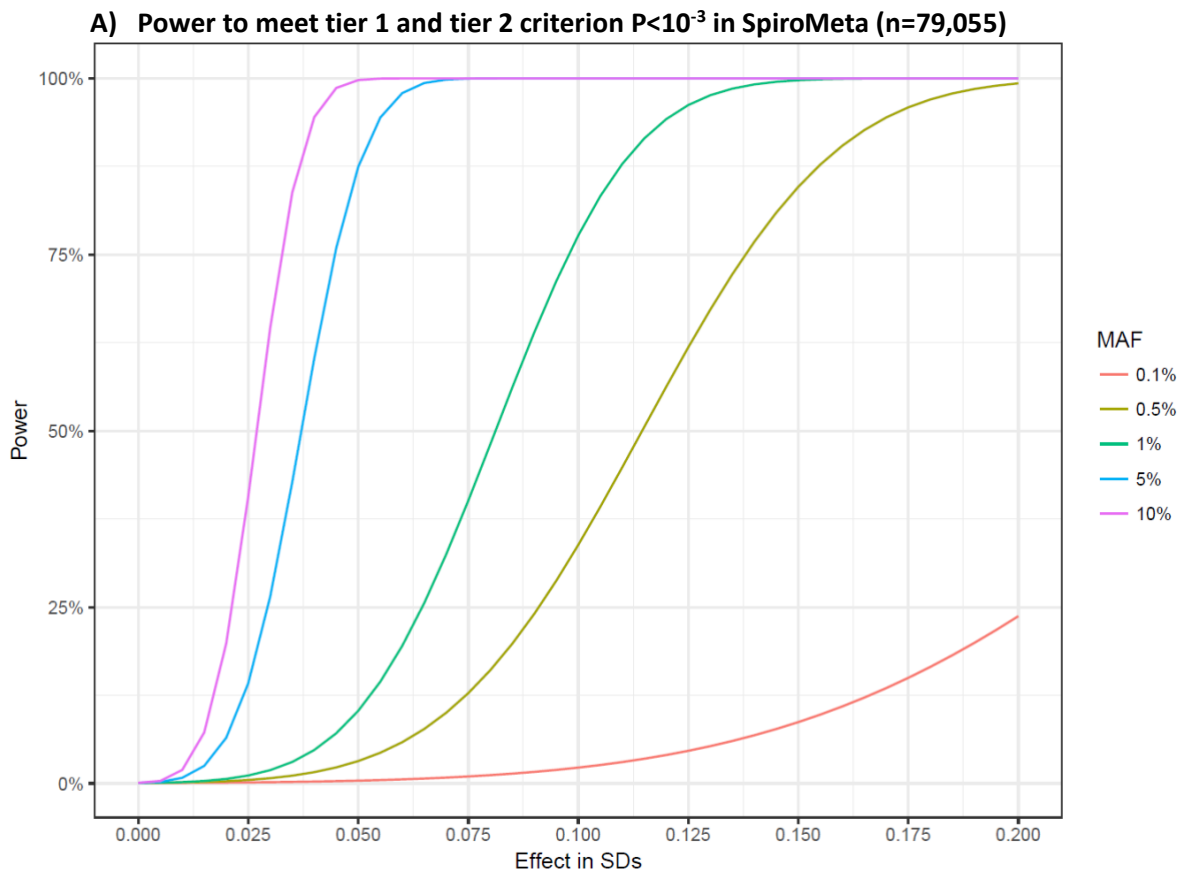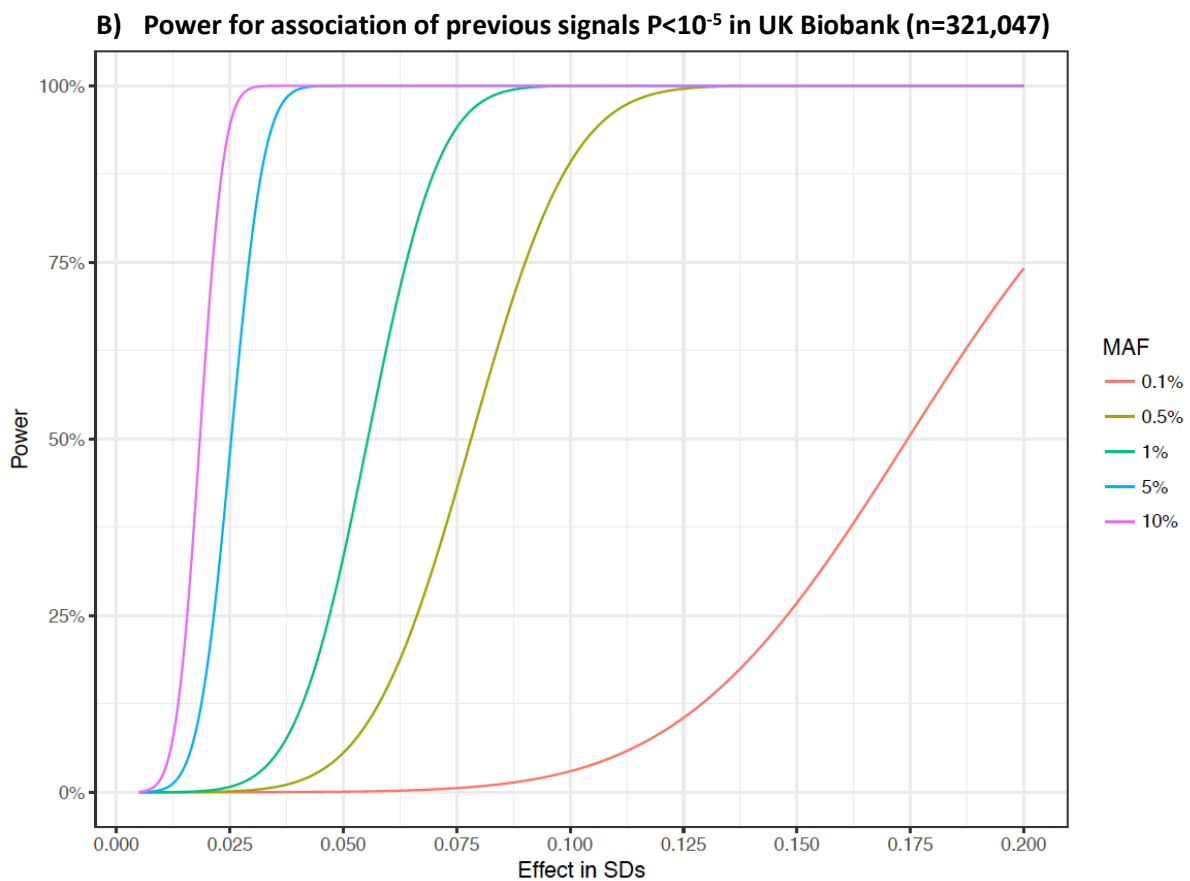

## Supplementary Figure 8: QQ plots

LD score regression implemented in LDSC<sup>49</sup> was used to estimate inflation of test statistics due to confounding. The unadjusted genomic inflation factors  $\lambda$  are shown as well as the LD score regression intercept which is the inflation factor adjusted for polygenicity. Genomic control was applied if the LD score regression intercept was larger than 1.05 suggesting residual inflation. Accordingly, genomic control was applied to UK Biobank but not SpiroMeta.

### UK Biobank

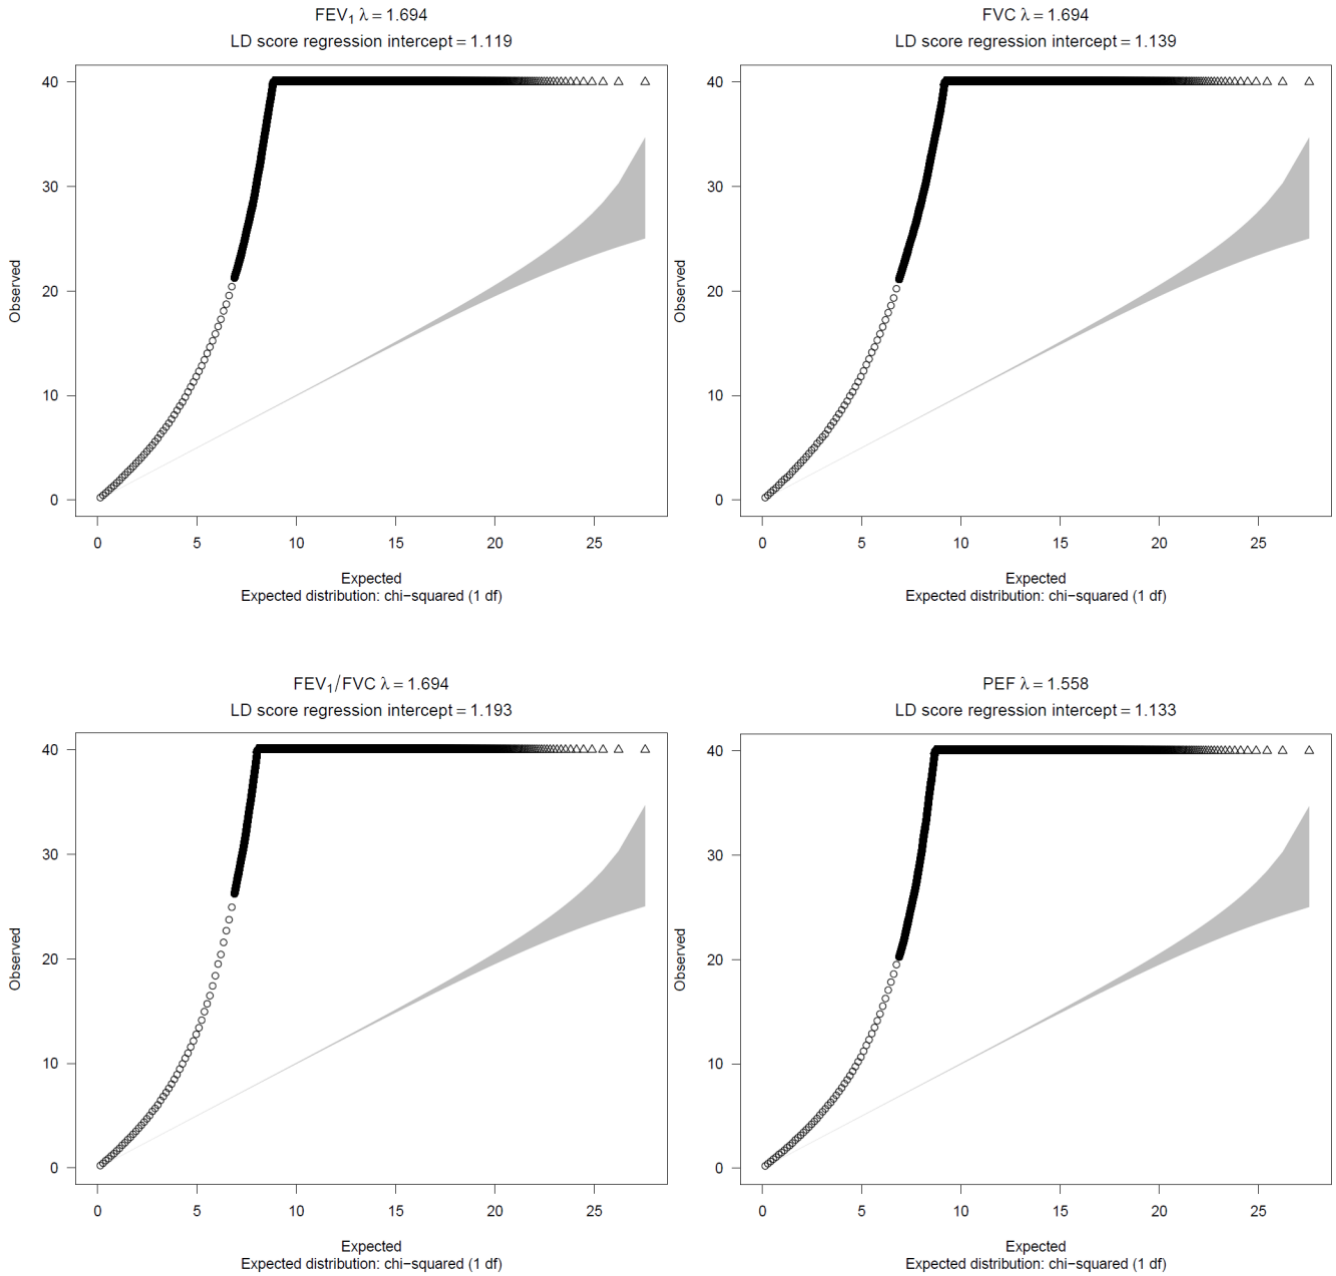

# SpiroMeta

FEV<sub>1</sub>  $\lambda = 1.121$   
LD score regression intercept = 0.998

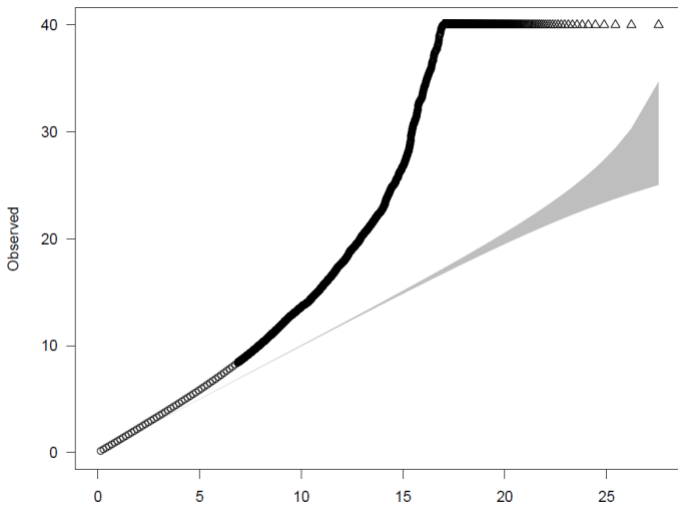

FVC  $\lambda = 1.121$   
LD score regression intercept = 1.002

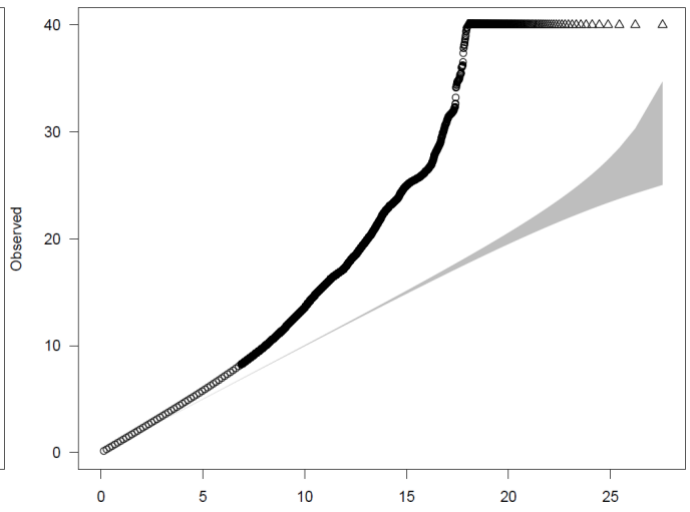

FEV<sub>1</sub>/FVC  $\lambda = 1.093$   
LD score regression intercept = 0.993

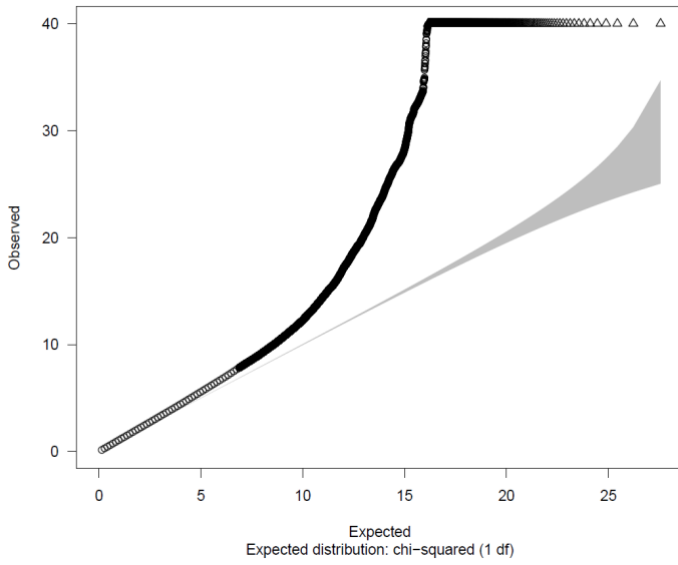

PEF  $\lambda = 1.01$   
LD score regression intercept = 0.972

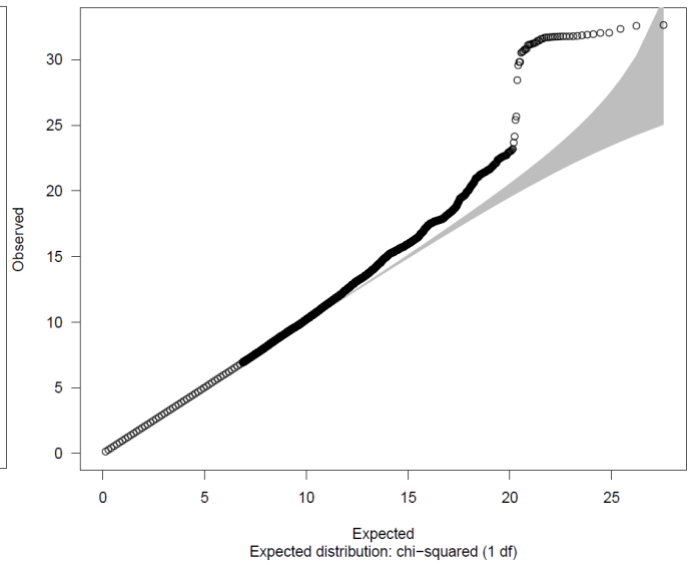

### **Supplementary Figure 9: Individual PheWAS results, separately by trait category**

In these extended plots, individual associations passing FDR 1% between the 279 lung function signals and 2411 traits are shown (y-axis:  $-\log_{10}(\text{FDR})$ ). Each category has its own separate subplot. Categories are presented in order of their most significant (according to FDR) association, and within each subplot, results for each trait are presented in decreasing order of FDR. Triangular points indicate quantitative traits, and circular points indicate binary traits. For each category, associations that are >50% of the highest  $-\log_{10}(\text{FDR})$  value are labelled with their rsID. Individual SNP results are also available in a separate file for download. Due to the size of these data, individual results of the 279\*2411 SNP-trait associations, along with details of their categorisation, and the plain English labels used in **Figure 4** of the main manuscript are available from the authors on request.

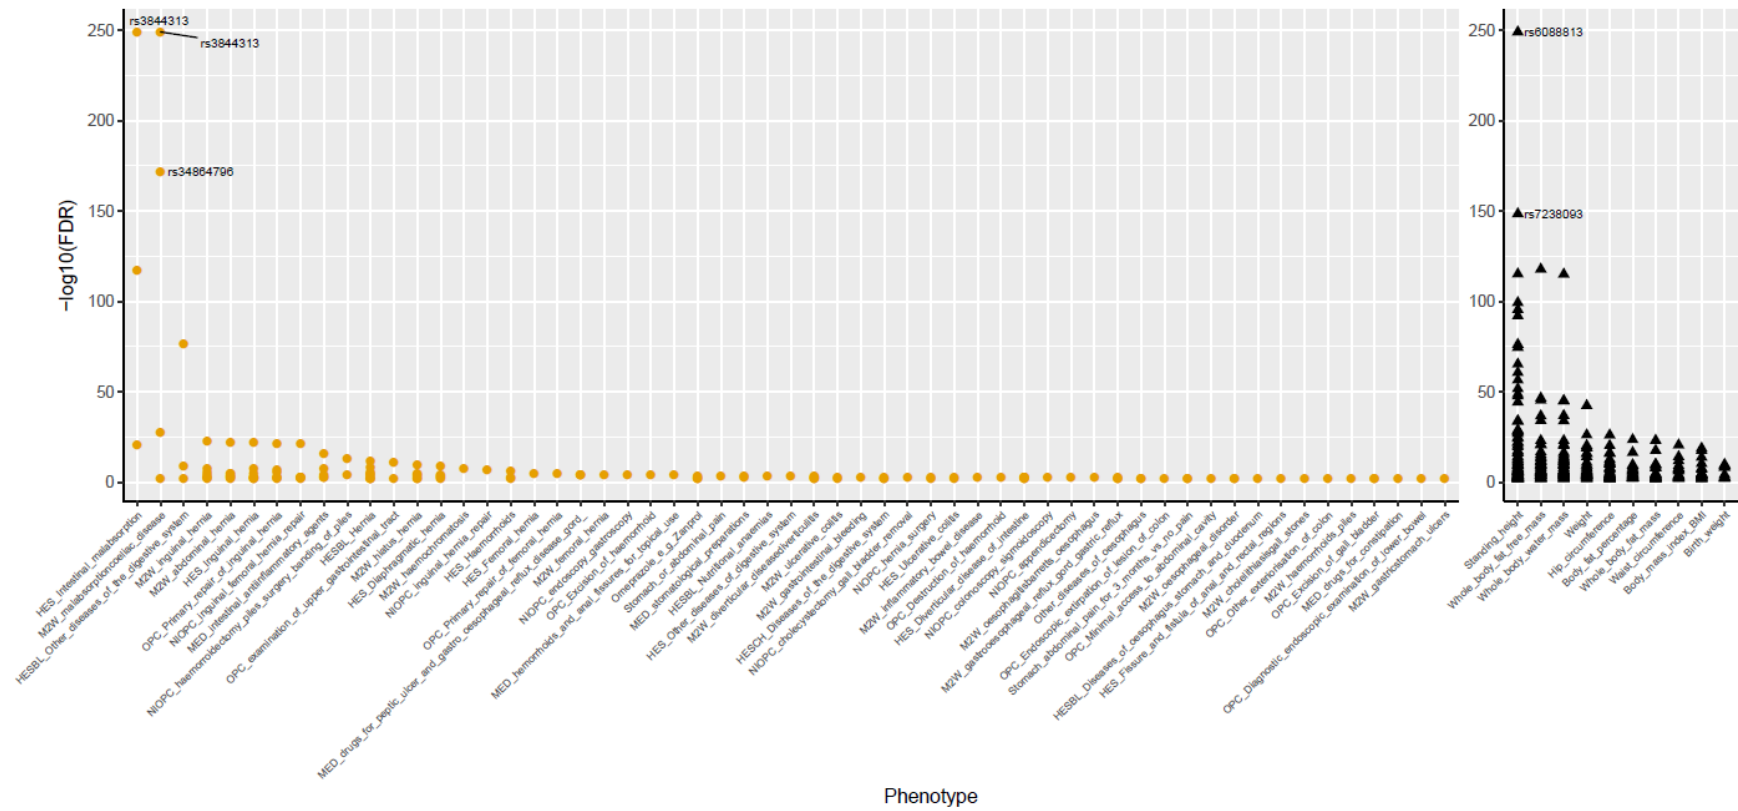

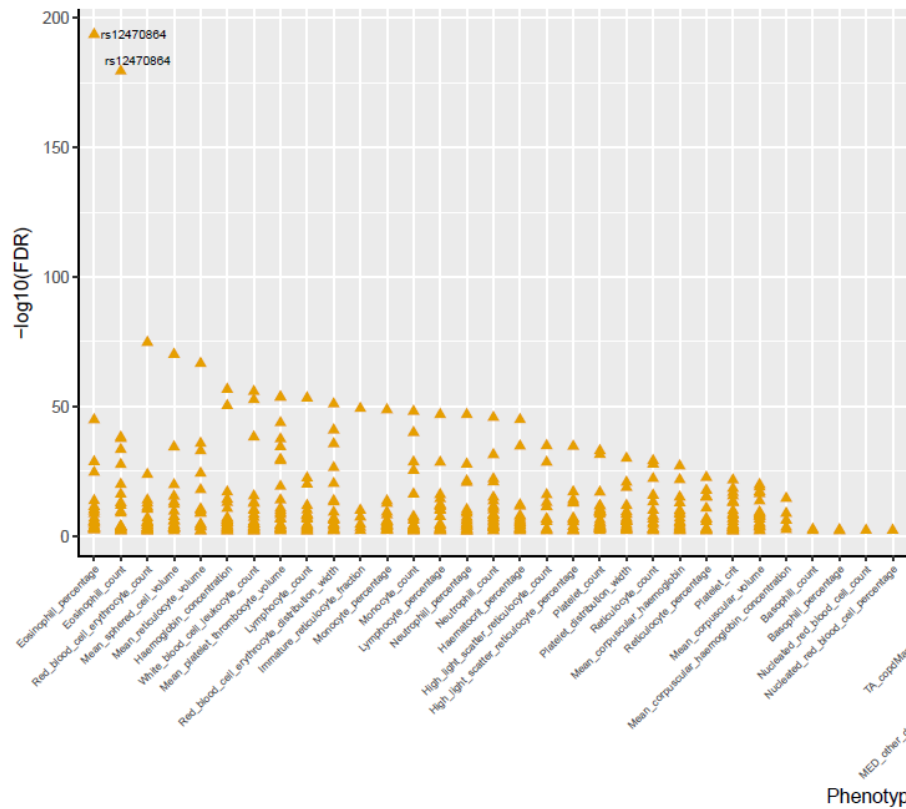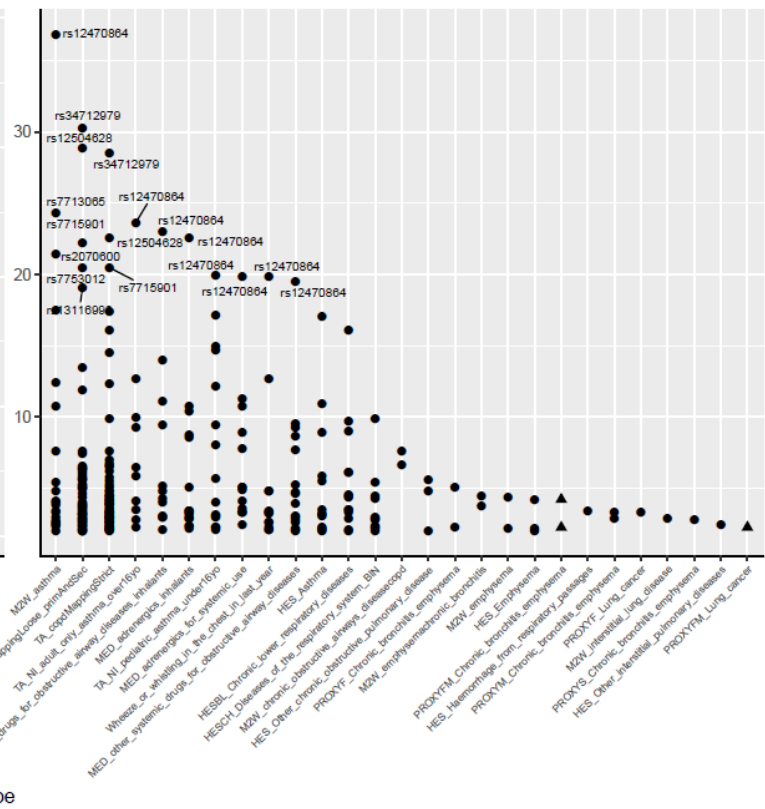

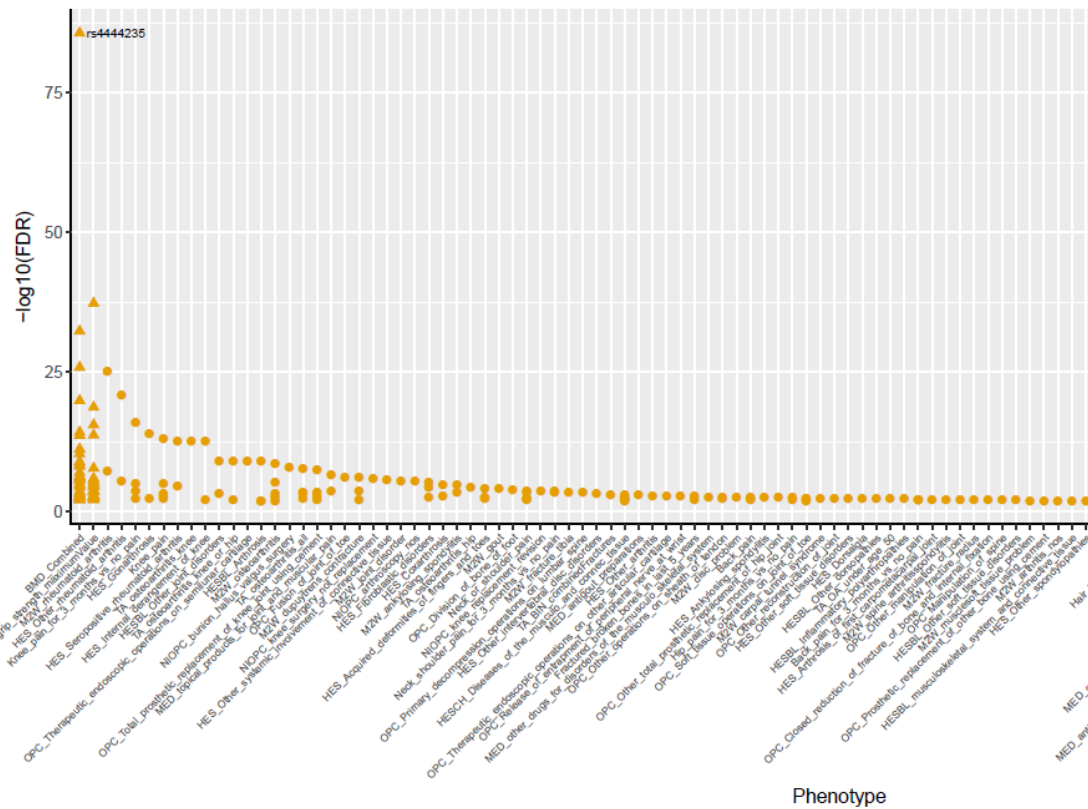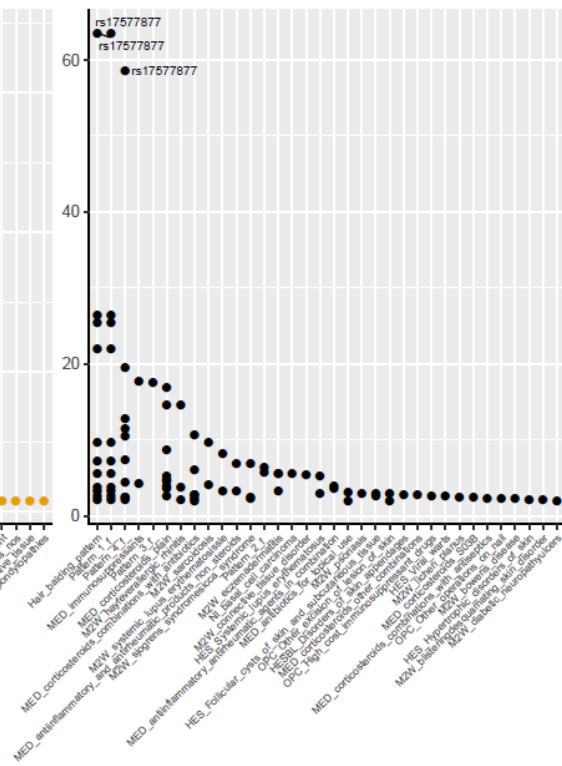

- Phenotypic Category
- Musculoskeletal disease (rheumatology and orthopaedics)
  - Immuno-inflammation and Skin
- Binary trait
- Binary
  - ▲ Quantitative

Phenotype



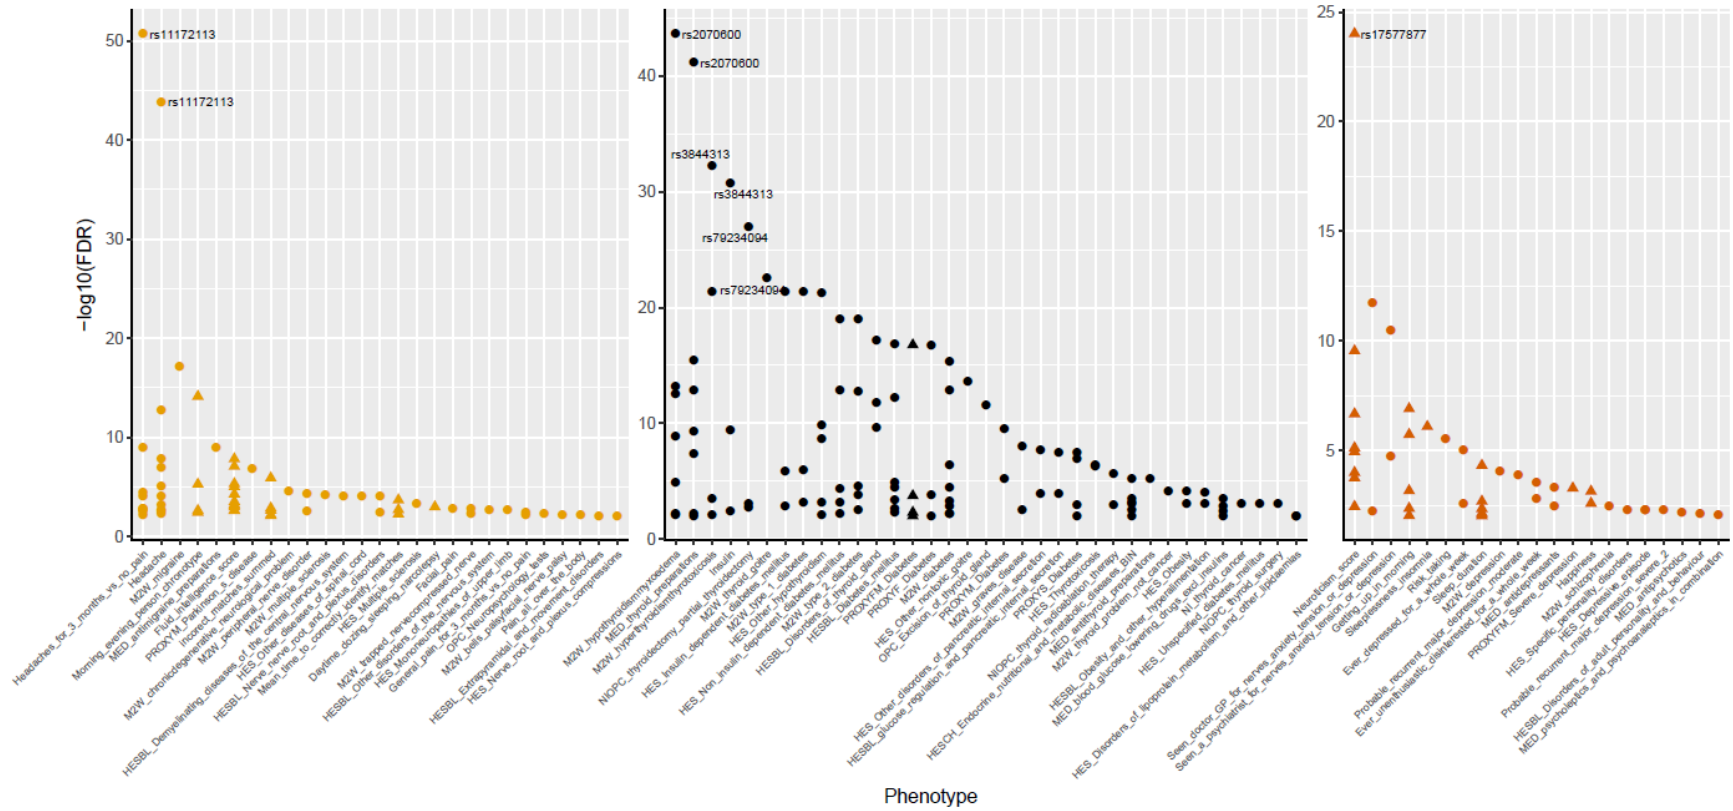

Phenotype

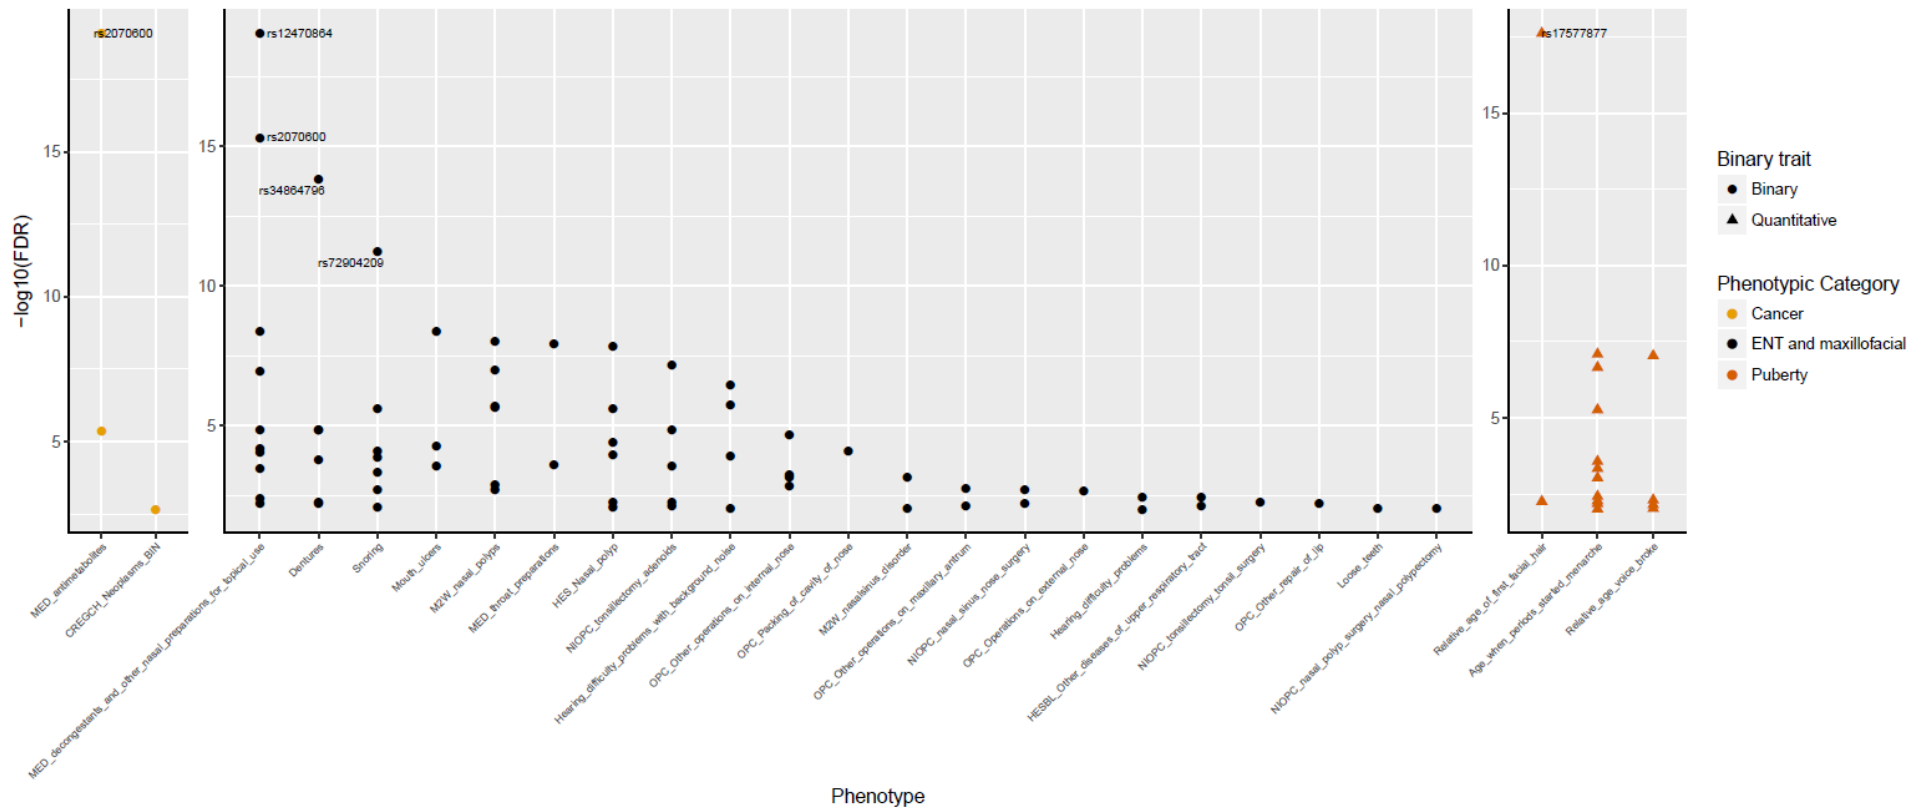

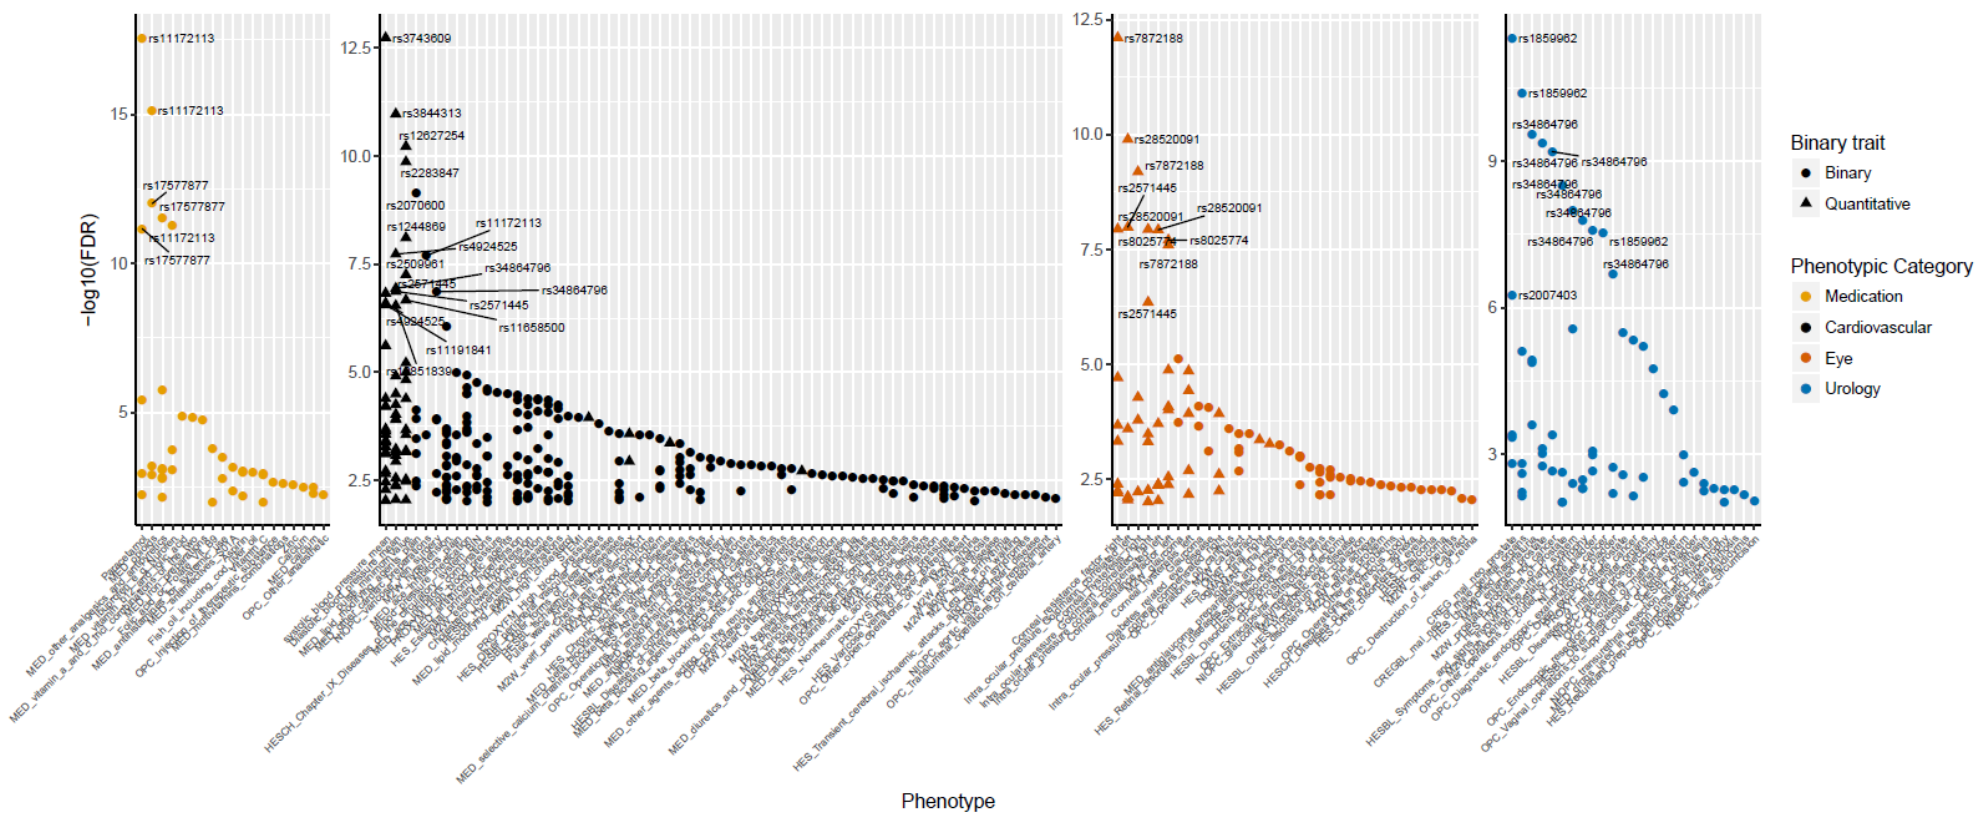

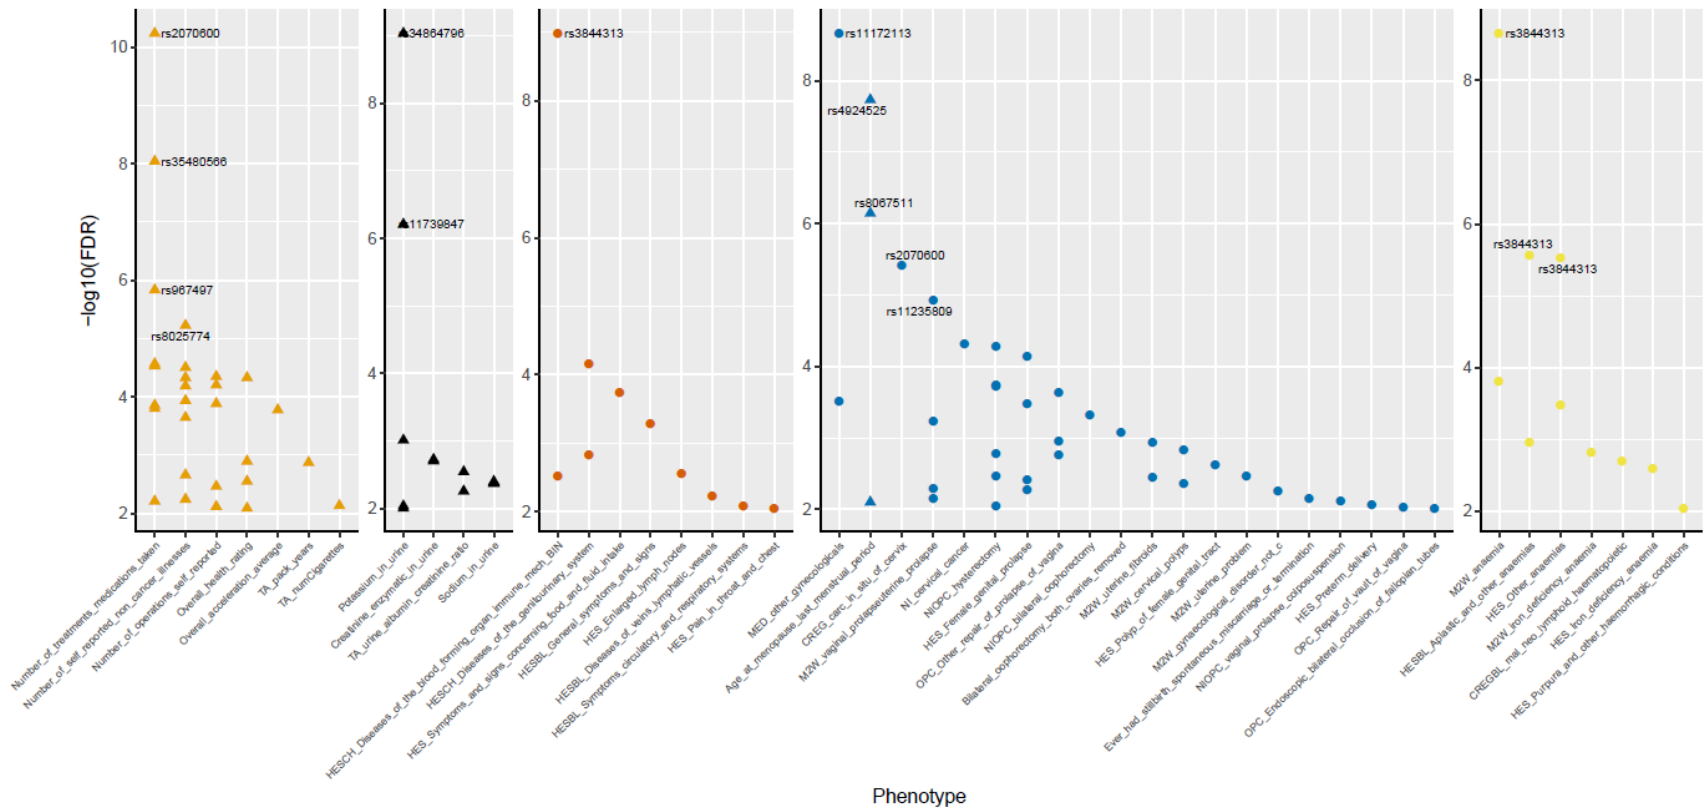

**Phenotypic Category**

- General health, smoking and socioeconomic
- Biological assays – Urine
- Broad symptoms, signs and diseases
- Gynaecology and Obstetrics
- Haematology

**Binary trait**

- Binary
- Quantitative

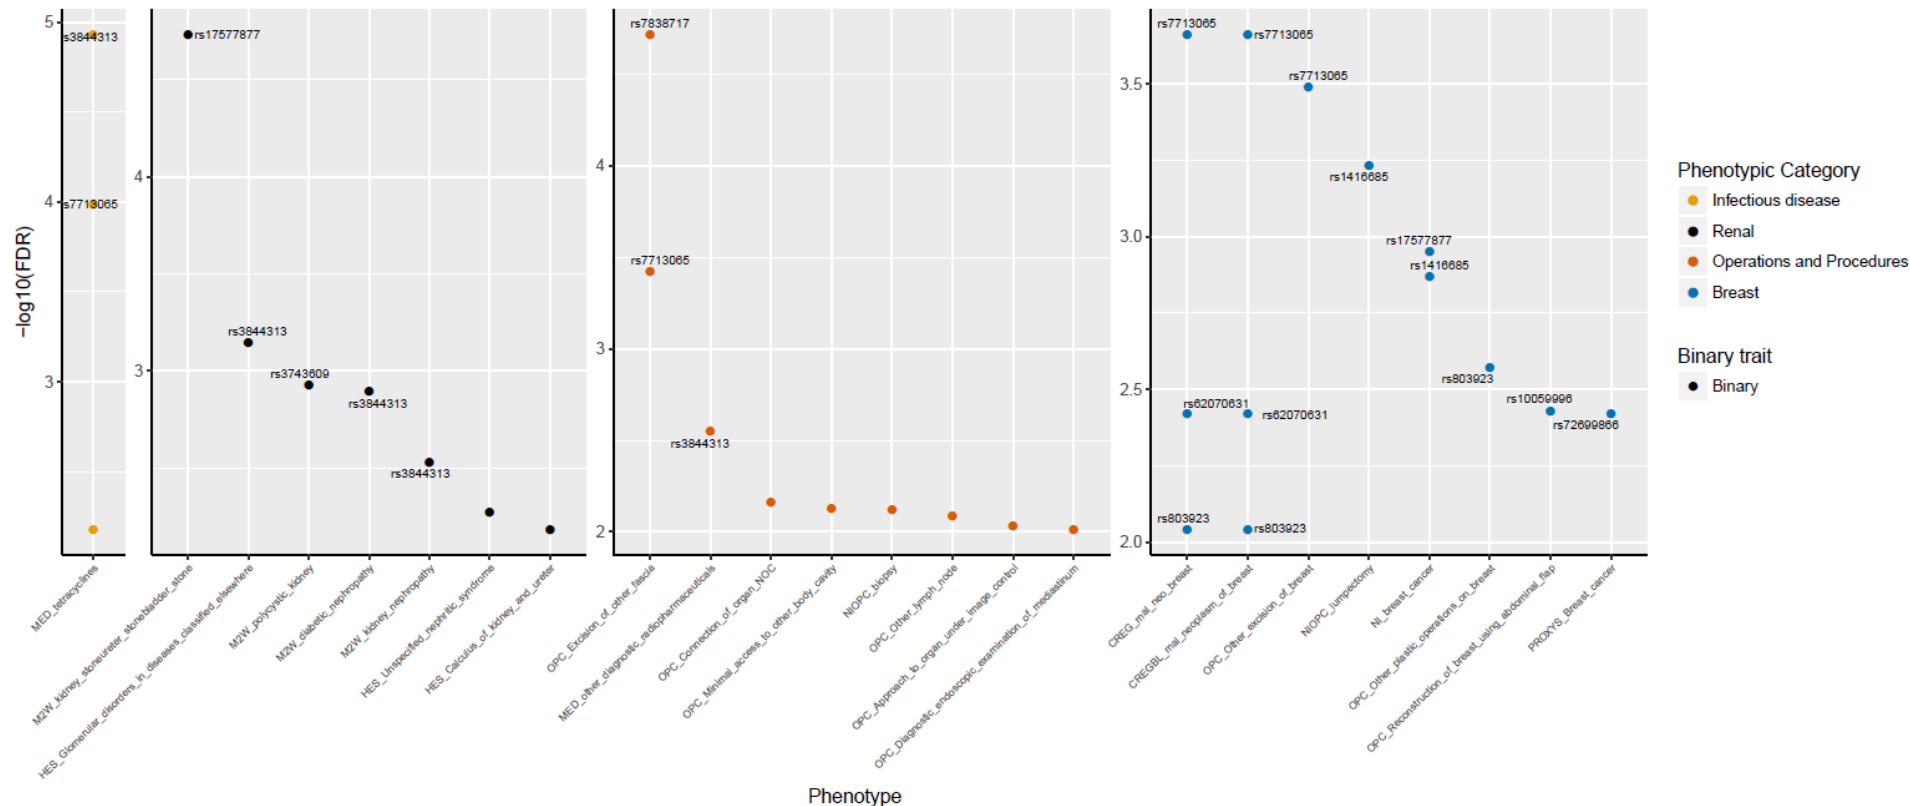

## Supplementary Tables

### Supplementary Table 1: UK Biobank demographics

Demographic information for UK Biobank samples of European ancestry used in discovery.

|                                                   |                 |
|---------------------------------------------------|-----------------|
| <b>N Total</b>                                    | 321,047         |
| <b>N male</b>                                     | 142,558         |
| <b>N female</b>                                   | 178,489         |
| <b>Age range (y) at lung function measurement</b> | 39-72           |
| <b>Mean age, y (s.d.)</b>                         | 56.44 (8.02)    |
| <b>Mean height, cm (s.d.)</b>                     | 168.57 (9.13)   |
| <b>Mean FEV<sub>1</sub>, L (s.d.)</b>             | 2.84 (0.76)     |
| <b>Mean FVC, L (s.d.)</b>                         | 3.74 (0.96)     |
| <b>Mean FEV<sub>1</sub>/FVC (s.d.)</b>            | 0.76 (0.06)     |
| <b>Mean PEF, L/min (s.d.)</b>                     | 406.19 (117.55) |
| <b>N never smokers</b>                            | 173,658         |
| <b>N ever smokers</b>                             | 147,389         |
| <b>UK BiLEVE array</b>                            | 49,107          |
| <b>UK Biobank array</b>                           | 271,940         |

## Supplementary Table 2: SpiroMeta Studies

B58C (B58C-T1DGC, British 1958 Birth Cohort–Type 1 Diabetes Genetics Consortium; B58C-GABRIEL British 1958 Birth Cohort–GABRIEL consortium; B58C-WTCCC, British 1958 Birth Cohort–Wellcome Trust Case Control Consortium); BHS1&2, Busselton Health Study 1 and 2; the CROATIA- Korcula study; the CROATIA-Split study; the CROATIA-Vis study; EPIC population based, European Prospective Investigation into Cancer and Nutrition Cohort; GS:SFHS, Generation Scotland: Scottish Family Health Study; H2000, Finnish Health 2000 survey; KORA F4, Cooperative Health Research in the Region of Augsburg; KORA S3, Cooperative Health Research in the Region of Augsburg; LBC1936, Lothian Birth Cohort 1936; NFBC1966, Northern Finland Birth Cohort of 1966; NFBC1966, Northern Finland Birth Cohort of 1986; NSPHS, Northern Sweden Population Health Study; ORCADES, Orkney Complex Disease Study; PIVUS, Prospective Investigation of the Vasculature in Uppsala Seniors; SHIP, Study of Health in Pomerania; SHIP-TREND; UKHLS; VIKING; YFS, the Young Finish Study. The total size in this table is not exactly equal to the maximum sample size given in the main text, since some studies had subtly different subsets of individuals entering each of the four lung function trait GWAS.

| Study name            | N Total | N male | N female | Age range (y) at lung function measurement | Mean age, y (s.d.) | Mean height, cm (s.d.) | Mean FEV <sub>1</sub> , L (s.d.) | Mean FVC, L (s.d.) | Mean FEV <sub>1</sub> /FVC (s.d.) | Mean PEF, L/min (s.d.) | N never smokers | N ever smokers | Genotyping Platform                                          | Imputation Panel |
|-----------------------|---------|--------|----------|--------------------------------------------|--------------------|------------------------|----------------------------------|--------------------|-----------------------------------|------------------------|-----------------|----------------|--------------------------------------------------------------|------------------|
| B58C                  | 5934    | 2955   | 2979     | 44-45                                      | 45.12 (0.38)       | 169.43 (9.29)          | 3.30 (0.76)                      | 4.19 (0.98)        | 0.79 (0.08)                       | --                     | 1709            | 4225           | Illumina 550k/610k                                           | 1000G            |
| BHS1&2                | 4355    | 1922   | 2433     | 17-97                                      | 51.21 (17.00)      | 168.00 (9.39)          | 3.01 (0.96)                      | 3.88 (1.16)        | 0.77 (0.07)                       | --                     | 2301            | 2054           | Illumina 610-Quad (N=1,168 ) & Illumina 660W-Quad (N=3,428 ) | 1000G            |
| CROATIA-Korcula       | 826     | 302    | 524      | 18-90                                      | 55.63 (13.50)      | 168.10 (9.20)          | 2.72 (0.83)                      | 3.29 (0.96)        | 0.83 (0.1)                        | --                     | 403             | 423            | Illumina HumanHap370CNV duo chip                             | 1000G            |
| CROATIA-Split         | 493     | 210    | 283      | 18-85                                      | 49.08 (14.63)      | 172.60 (9.49)          | 3.19 (0.91)                      | 3.80 (1.06)        | 0.84 (0.08)                       | --                     | 239             | 254            | Illumina HumanHap370CNV quad chip                            | 1000G            |
| CROATIA-Vis           | 925     | 390    | 535      | 18-88                                      | 55.90 (15.51)      | 167.80 (9.88)          | 3.42 (1.21)                      | 4.41 (1.42)        | 0.77 (0.09)                       | --                     | 388             | 537            | Illumina Infinium HumanHap300 BeadChip                       | 1000G            |
| EPIC population based | 20771   | 9664   | 11107    | 39-79                                      | 59.1 (9.27)        | 167.1 (9.08)           | 2.51 (0.74)                      | 3.06 (0.93)        | 0.83 (0.11)                       | 364.07 (123.16)        | 9532            | 11239          | Affymetrix UKBioBank Axiom                                   | HRC              |
| GS:SFHS               | 16048   | 6633   | 10415    | 18-99                                      | 46.87 (14.6)       | 168.4 (9.50)           | 2.97 (0.88)                      | 3.88 (1.00)        | 0.76 (0.11)                       | --                     | 8581            | 7467           | Illumina OmniExpress+Exome                                   | HRC              |
| H2000                 | 821     | 394    | 427      | 30-75                                      | 50.47 (10.91)      | 169.10 (9.14)          | 3.29 (0.9)                       | 4.16 (1.07)        | 0.79 (0.07)                       | --                     | 249             | 572            | Illumina HumanHap 610K                                       | 1000G            |
| KORA F4               | 1474    | 717    | 757      | 41-84                                      | 55.08 (9.90)       | 169.15 (9.42)          | 3.23 (0.85)                      | 4.19 (1.05)        | 0.77 (0.07)                       | --                     | 556             | 918            | Affymetrix Axiom                                             | 1000G            |
| KORA S3               | 1147    | 551    | 596      | 28-89                                      | 50.82 (15.23)      | 169.22 (9.32)          | 3.34 (0.90)                      | 4.10 (1.06)        | 0.81 (0.08)                       | --                     | 520             | 627            | Illumina Omni 2.5/ Illumina Omni Express                     | 1000G            |
| LBC1936               | 991     | 501    | 490      | 68-71                                      | 69.55 (0.84)       | 166.44 (8.93)          | 2.38 (0.67)                      | 3.04 (0.87)        | 0.79 (0.10)                       | --                     | 437             | 554            | Illumina 610-Quadv1                                          | 1000G            |
| NFBC1966              | 5078    | 2417   | 2661     | 30-32                                      | 31.15 (0.35)       | 171.24 (9.09)          | 3.95 (0.79)                      | 4.72 (0.99)        | 0.84 (0.06)                       | --                     | 2478            | 2600           | Illumina HumanCNV-370DUO Analysis BeadChip                   | HRC              |

| Study name | N Total | N male | N female | Age range (y) at lung function measurement | Mean age, y (s.d.) | Mean height, cm (s.d.) | Mean FEV <sub>1</sub> , L (s.d.) | Mean FVC, L (s.d.) | Mean FEV <sub>1</sub> /FVC (s.d.) | Mean PEF, L/min (s.d.) | N never smokers | N ever smokers | Genotyping Platform                                         | Imputation Panel |
|------------|---------|--------|----------|--------------------------------------------|--------------------|------------------------|----------------------------------|--------------------|-----------------------------------|------------------------|-----------------|----------------|-------------------------------------------------------------|------------------|
| NFBC1986   | 3210    | 1516   | 1694     | 14-16                                      | 16.01 (0.37)       | 169.34 (8.43)          | 3.78 (0.70)                      | 4.31 (0.85)        | 0.88 (0.08)                       | --                     | 2476            | 734            | Illumina Human Omni Express Exome 8v1.2                     | HRC              |
| NSPHS      | 871     | 400    | 471      | 14-91                                      | 49.20 (20.00)      | 164.00 (10.10)         | 2.92 (0.90)                      | 3.53 (1.06)        | 0.83 (0.09)                       | --                     | 750             | 121            | Illumina Infinum HapMap 300 v2 & Illumina Human OmniExpress | 1000G            |
| ORCADES    | 1802    | 719    | 1083     | 16-91                                      | 54.00 (15.00)      | 166.00 (9.20)          | 2.89 (0.83)                      | 3.61 (0.99)        | 0.79 (0.08)                       | --                     | 1022            | 780            | Illumina Hap300, Illumina Omni1 & Illumina OmniX            | 1000G            |
| PIVUS      | 806     | 395    | 411      | 69-72                                      | 70.20 (0.176)      | 169.09 (9.208)         | 2.45 (0.680)                     | 3.23 (0.869)       | 0.764 (0.103)                     | --                     | 393             | 413            | Illumina OmniExpress and Metabochip                         | HRC              |
| SAPALDIA   | 1378    | 665    | 713      | 18-61                                      | 41.30 (11.20)      | 169.47 (9.12)          | 3.53 (0.86)                      | 4.50 (1.04)        | 0.78 (0.08)                       | --                     | 631             | 747            | Illumina 610k quad                                          | 1000G            |
| SHIP       | 1759    | 860    | 899      | 20-80                                      | 47.17 (13.67)      | 169.7 (9.13)           | 3.28 (0.89)                      | 3.87 (1.03)        | 0.85 (0.06)                       | 437.58 (125.17)        | 818             | 941            | Affymetrix SNP 6.0                                          | HRC              |
| SHIP-TREND | 804     | 363    | 441      | 21-81                                      | 51.24 (13.34)      | 169.9 (9.00)           | 3.29 (0.87)                      | 4.14 (1.06)        | 0.80 (0.06)                       | 392.82 (125.91)        | 342             | 462            | Illumina Human Omni 2.5                                     | HRC              |
| UKHLS      | 7442    | 3290   | 4152     | 16-99                                      | 53.11 (15.94)      | 167.7 (9.45)           | 2.84 (0.90)                      | 3.83 (1.09)        | 0.75 (0.09)                       | --                     | 2938            | 4504           | Illumina CoreExome v1.0                                     | HRC              |
| VIKING     | 1701    | 672    | 1029     | 18-91                                      | 50.72 (14.97)      | 168 (0.09)             | 3.07 (0.81)                      | 4.02 (0.96)        | 0.76 (0.09)                       | 450.08 (130.14)        | 943             | 757            | Illumina OmniExpress Exome                                  | HRC              |
| YFS        | 419     | 198    | 221      | 30-47                                      | 38.88 (5.07)       | 172.25 (8.90)          | 3.73 (0.75)                      | 4.68 (0.99)        | 0.8 (0.06)                        | --                     | 233             | 186            | Illumina 670k custom                                        | 1000G            |



**Supplementary Table 3: SpiroMeta analysis method**

| Study name            | Individual call rate filter (applied before imp'n) | SNP call rate filter (applied before imp'n) | SNP HWE <i>P</i> filter (applied before imp'n)    | SNP MAF filter (applied before imp'n) | Other filters                                                                                                                                                                                                                                                                                                                                                                                | No of SNPs after filtering (before imp'n) | Imputation software and version  | Reference panel used for imp'n                                    | Genotype-phenotype association software |
|-----------------------|----------------------------------------------------|---------------------------------------------|---------------------------------------------------|---------------------------------------|----------------------------------------------------------------------------------------------------------------------------------------------------------------------------------------------------------------------------------------------------------------------------------------------------------------------------------------------------------------------------------------------|-------------------------------------------|----------------------------------|-------------------------------------------------------------------|-----------------------------------------|
| B58C                  | None                                               | >=95%                                       | ≥0.0001 (tested on females only for chromosome X) | ≥1%                                   | Consistent allele frequencies across data deposits ( $P \geq 0.0001$ for pairwise comparisons) and for chrX SNPs, consistent allele frequencies between males and females ( $P \geq 0.0001$ ).                                                                                                                                                                                               | 500,521 (including 11,696 chrX)           | MACH 1.0.18 & Minimac 2012-11-16 | 1000 Genomes Phase 1 March 2012                                   | probABEL 0.1-9e                         |
| BHS1&2                | 0.95                                               | 0.95                                        | 1.00E-06                                          | 0.01                                  | Individuals were removed if they had sex inconsistencies, had heterozygosity >5 s.d. from the mean, were PCA outliers, were 1 individual from a pair of duplicates or had IBD inconsistencies.                                                                                                                                                                                               | 521,307                                   | Minimac and MACH1 v1.0.18        | b37; 1000 Genomes Phase 1 March 2012                              | ProbABEL                                |
| CROATIA-Korcula       | 97%                                                | 98%                                         | 1.00E-06                                          | 0.01                                  |                                                                                                                                                                                                                                                                                                                                                                                              | 316,879                                   | SHAPEIT2, IMPUTE2                | b37; ALL (1000 Genomes Phase 1 integrated release v3, April 2012) | ProbABEL                                |
| CROATIA-Split         | 97%                                                | 98%                                         | 1.00E-06                                          | 0.01                                  |                                                                                                                                                                                                                                                                                                                                                                                              | 321,727                                   | SHAPEIT2, IMPUTE2                | b37; ALL (1000 Genomes Phase 1 integrated release v3, April 2012) | ProbABEL                                |
| CROATIA-Vis           | 97%                                                | 98%                                         | 1.00E-06                                          | 0.01                                  |                                                                                                                                                                                                                                                                                                                                                                                              | 273,671                                   | SHAPEIT2, IMPUTE2                | b37; ALL (1000 Genomes Phase 1 integrated release v3, April 2012) | ProbABEL                                |
| EPIC population based | None                                               | 95%                                         | 1.00E-08                                          | Per-plate basis                       | Monomorphic SNPs; chr 23-26; INDELS; monomorphic; call rate<95%; chr-pos-allels duplicates; delta-AF > 0.2; delta_AF>0.1 if MAF<0.01. Oxford QC:) exclude SNPs if not in HRC ref (no INDEL in HRC ref); 2) exclude if don't match on chr-pos-allele; 3) strand check and flip; 4) exclude if delta-AF>0.2; 5) exclude A/T and G/C SNPs with MAF>0.4 in ref; 6) exclude if chr-pos duplicates | 708,715                                   | SHAPEIT v2.r790, Oxford          | HRC v1.0, 1000 Genomes p3                                         | BOLT-LMM v2.2                           |
| GS:SFHS               | 97%                                                | 98%                                         | 1.00E-06                                          | 0.01                                  | Genetic ancestry outliers; monomorphic SNPs; high heterozygosity                                                                                                                                                                                                                                                                                                                             | 602,451                                   | SHAPEIT2 v2.r837, Sanger         | HRC panel v1.1, European                                          | REGSCAN                                 |

| Study name | Individual call rate filter (applied before imp'n) | SNP call rate filter (applied before imp'n) | SNP HWE P filter (applied before imp'n)   | SNP MAF filter (applied before imp'n)    | Other filters                                                                                                                                                                                                                                  | No of SNPs after filtering (before imp'n)                                                          | Imputation software and version                      | Reference panel used for imp'n                                                                              | Genotype-phenotype association software |
|------------|----------------------------------------------------|---------------------------------------------|-------------------------------------------|------------------------------------------|------------------------------------------------------------------------------------------------------------------------------------------------------------------------------------------------------------------------------------------------|----------------------------------------------------------------------------------------------------|------------------------------------------------------|-------------------------------------------------------------------------------------------------------------|-----------------------------------------|
| H2000      | 0.95                                               | 0.95 (0.99 for SNPs with MAF < 0.05)        | 1.00E-06                                  | 0.01                                     |                                                                                                                                                                                                                                                | 553,722                                                                                            | IMPUTE version 2.2.2                                 | 1,000 Genomes haplotypes -- Phase I integrated variant set release (v3) in NCBI build 37 (hg19) coordinates | SNPTest                                 |
| KORA F4    | 0.97                                               | 0.98                                        | 5x10-6                                    | 0.01                                     | -mismatch of phenotypic and genetic gender<br>- 5s.d. from mean heterozygosity rate<br>- check for European ancestry<br>- check for population outlier                                                                                         | 523,260 (chr 1-26)<br>508,532 (chr 1-22)<br>14,096(chrX-nonPAR)<br>444(chrX-PAR1)<br>58(chrX-PAR2) | SHAPEIT v2, IMPUTE v2.3.0                            | 1000g phase1 all (ALL_1000G_phase1integrated_v3_impute_mac1)                                                | SNPTEST v2.4.1                          |
| KORA S3    | 0.97                                               | 0.98                                        | 5x10-6                                    | 0.01                                     | person wise: -mismatch of phenotypic and genetic gender<br>- 5s.d. from mean heterozygosity rate<br>- check for European ancestry<br>- check for population outlier<br>SNP wise: only SNPs that were genotyped with good quality on both chips | 600641 (chr 1-26)<br>588307 (chr 1-22)<br>14625 (chrX-nonPAR)                                      | SHAPEIT v2, IMPUTE v2.3.0                            | 1000g phase1 all (ALL_1000G_phase1integrated_v3_impute_mac1)                                                | SNPTEST v2.4.1                          |
| LBC1936    | 0.95                                               | 0.98                                        | ≥0.001                                    | 0.01                                     |                                                                                                                                                                                                                                                | 549,692                                                                                            | minimac 2012-11-16                                   | 1000 Genomes version 3, cosmopolitan                                                                        | mach2qtl                                |
| NFBC1966   | 0.95                                               | 0.95                                        | 1.00E-04                                  | 0.01                                     | Genetic ancestry outliers; monomorphic SNPs; high heterozygosity; Gender mismatch; 0 genetic sex; high heterozygosity; high relatedness                                                                                                        | 364,535                                                                                            | Eagle v2.3, Michigan                                 | HRC r1.1 2016, European                                                                                     | rvtests                                 |
| NFBC1986   | 0.99                                               | 0.99                                        | 1.00E-04                                  | 0.01                                     | Genetic ancestry outliers; monomorphic SNPs; high heterozygosity; Gender mismatch; high heterozygosity; high relatedness                                                                                                                       | 889,119                                                                                            | Eagle v2.3, Michigan                                 | HRC r1.1 2016, European                                                                                     | rvtests                                 |
| NSPHS      | 0.9                                                | 0.95                                        | 3.2E-08 (Infinum) & 1.4E-08 (OmniExpress) | 0.01                                     | FDR level of heterozygosity 0.01                                                                                                                                                                                                               | 306,086 (Infinum) & 631503 (OmniExpress)                                                           | Impute2 (v 2.2.2)                                    | hg19, 1000 Genomes                                                                                          | ProbABEL                                |
| ORCADES    | 98%                                                | 97%                                         | 1.00E-06                                  | 1% (Hap300) & monomorphic (Omni & OmniX) | Subject Heterozygosity FDR<1%                                                                                                                                                                                                                  | 287,208 (Hap300), 843723 (Omni) & 654651 (OmniX)                                                   | shapeit.v2.r644.+impute_v2.2.2_x86_64_static/impute2 | 1000G Phase I Integrated Release Version 3 Haplotypes (2010-11 data freeze, 2012-03-14 haplotypes).         | probABEL v. 0.4.3                       |

| Study name | Individual call rate filter (applied before imp'n) | SNP call rate filter (applied before imp'n) | SNP HWE <i>P</i> filter (applied before imp'n) | SNP MAF filter (applied before imp'n)                        | Other filters                                                                                                                                                                                                                                                                                                                                                                                                 | No of SNPs after filtering (before imp'n) | Imputation software and version                                                                            | Reference panel used for imp'n                          | Genotype-phenotype association software |
|------------|----------------------------------------------------|---------------------------------------------|------------------------------------------------|--------------------------------------------------------------|---------------------------------------------------------------------------------------------------------------------------------------------------------------------------------------------------------------------------------------------------------------------------------------------------------------------------------------------------------------------------------------------------------------|-------------------------------------------|------------------------------------------------------------------------------------------------------------|---------------------------------------------------------|-----------------------------------------|
| PIVUS      | 0.95                                               | 0.95 (0.99 if MAF<0.05)                     | 1.00E-06                                       | 0.01                                                         | Genetic ancestry outliers; monomorphic SNPs; >3SD from mean for heterozygosity, pi-hat>0.125, gender discordance                                                                                                                                                                                                                                                                                              | 738,583                                   | SHAPEITv2, Oxford                                                                                          | HRC v1.1, all                                           | SNPTEST v2.5                            |
| SAPALDIA   | 95%                                                | 95%                                         | 1.00E-06                                       | 0.01                                                         | none                                                                                                                                                                                                                                                                                                                                                                                                          | 545,131                                   | Mach 1.0.16.a, minimac-omp RELEASE STAMP 2012-05-29 (autosomes) & MiniMac RELEASE STAMP 2012-11-16 (chr X) | build37, 1000 Genomes                                   | probABEL                                |
| SHIP       | 0.92                                               | 0.95                                        | 1.00E-04                                       | None                                                         | Genetic ancestry outliers; gender mismatch; pi-hat>0.25; monomorphic SNPS                                                                                                                                                                                                                                                                                                                                     | 760,787                                   | Eagle v2.3, Michigan                                                                                       | HRC v1.1 reference, European                            | Rvtests                                 |
| SHIP-TREND | 0.94                                               | 0.95                                        | 1.00E-04                                       | None                                                         | Genetic ancestry outliers; gender mismatch; pi-hat>0.25; monomorphic SNPS                                                                                                                                                                                                                                                                                                                                     | 1,691,610                                 | Eagle v2.3, Michigan                                                                                       | HRC v1.1 reference, European                            | Rvtests                                 |
| UKHLS      | 0.98                                               | 0.98                                        | 1.00E-04                                       | None                                                         | Genetic ancestry, monomorphic SNPs, heterozygosity 3sd <>mean -visualised at 2 different MAF bins (≥1% and <1%); PI_HAT 0.2; Cluster separation score <0.4; sex check, ethnicity duplicates, withdrawn consent. Pre-imputation variants excluded that were: monomorphic, indels, differed to HRC in terms of strand, alleles, allele frequency (>0.2), A/T & G/C SNPs if MAF >0.4 and not in reference panel. | 357,230                                   | Autosomes: Eagle v2.3; ChrX: Shapeit v2.r790, Michigan                                                     | Autosomes: HRC r1.1 2016; ChrX: HRC r1.1 2017, European | SNPTEST v2.5                            |
| VIKING     | 0.97                                               | 0.98                                        | 1.00E-06                                       | MAF>0.01 for OMNI markers; MAF>0.0001 for Exome Chip markers | Genetic ancestry outliers; monomorphic SNPs; Duplicates and siblings                                                                                                                                                                                                                                                                                                                                          | 668,762                                   | shapeit2r837 + duohmm; PBWT Sanger                                                                         | HRC v1.1, European                                      | REGSCAN 0.4                             |
| YFS        | 0.95                                               | 0.95                                        | 1.00E-06                                       | 0.01                                                         | heterozygosity, relatedness                                                                                                                                                                                                                                                                                                                                                                                   | 546,674                                   | SHAPEIT v1 and IMPUTE v2.2.2                                                                               | 1000 Genomes Phase 1, release v3, March 2012 haplotypes | SNPTEST v.2.4.1                         |

#### **Supplementary Table 4: 139 novel signals**

*See Excel spreadsheet.*

139 independent ( $r^2 < 0.1$ ) novel signals of association with lung function (99 tier 1, 40 tier 2): tier 1 signals meet the criteria  $P < 5 \times 10^{-9}$  in UK Biobank and  $P < 10^{-3}$  in SpiroMeta; tier 2 signals meet the criteria  $P < 5 \times 10^{-9}$  in the meta-analysis and  $P < 10^{-3}$  in both UK Biobank and SpiroMeta. UK Biobank p values have genomic control applied using the LD score regression intercept as the inflation factor (**Supplementary Table 24**). No genomic control was applied to SpiroMeta and the meta-analysis as there was no significant inflation after LD score regression. The allele frequencies and individual variant sample sizes for SpiroMeta were calculated based on a working total sample size of 83,118. For two secondary signals (rs10874851 and rs4796334) the association results are from a conditional analysis (no genomic control) where the primary signal is shown in the “conditioned on” column. Direction of effect is consistent for all signals.

#### **Supplementary Table 5: Tier 3 signals**

*See Excel spreadsheet.*

Signals that reached  $P < 5 \times 10^{-9}$  in UK Biobank or the meta-analysis of UK Biobank and SpiroMeta, with consistent directions of effect but did not meet  $P < 10^{-3}$  in SpiroMeta required to qualify as a Tier 2 signal.

#### **Supplementary Table 6: Association with smoking behaviour**

*See Excel spreadsheet.*

Look up of smoking behaviour for 139 novel signals and 142 previously reported signals associated with lung function in this study. Also show are: lung function association results from the UK Biobank and SpiroMeta meta-analysis. Bold P value for Smoking initiation (SI) or Cigarettes per day (CPD) indicates association with smoking behaviour  $P < 1.8 \times 10^{-4}$  (Bonferroni threshold for 281 tests).

#### **Supplementary Table 7: Smoking interaction**

*See Excel spreadsheet.*

Results from stratified analyses of ever / never smokers in UK Biobank, SpiroMeta and a fixed-effects meta-analysis of the two. Evidence of interaction between ever and never smokers was sought by conducting a Welch test on the results of the stratified meta-analysis. A Bonferroni threshold of  $1.79 \times 10^{-4}$  ( $p = 0.05/279$  tests) was used.

#### **Supplementary Table 8: Previously reported signals**

*See Excel spreadsheet.*

185 signals previously reported for lung function or COPD. For inclusion with our 139 novel signals in downstream analyses we first removed 24 non-independent ( $r^2 > 0.1$ ) signals from a recent GWAS of lung function. We also removed 3/6 HLA signals that were not independent, as established in one of our previous publications<sup>45</sup>. We then selected a subset of 142 signals that showed evidence of association in this study (UK Biobank P in bold):  $P < 5 \times 10^{-5}$  in 321,047 UK Biobank samples for any lung function phenotype, either for the reported sentinel or a proxy with  $r^2 > 0.5$ , or if one of our Tier 1 or 2 signals is in LD  $r^2 > 0.1$  with the previously reported sentinel. In downstream analyses, we excluded two signals (15q25 and CYP2A6, which have previously been reported to be associated with smoking behaviour, but are not associated with lung function in never smokers in the present study. This left 140 previously reported signals for inclusion in our final set of signals for downstream analyses Where PubMed ID (PMID) is missing, the variants are currently reported on bioRxiv<sup>46</sup>.

#### **Supplementary Table 9: Results for 279 lung function signals for all 4 traits**

*See Excel spreadsheet.*

Results from the meta-analysis of UK Biobank and SpiroMeta for all 279 reported lung function signals for each of the lung function quantitative traits FEV<sub>1</sub>, FVC, FEV<sub>1</sub>/FVC and PEF.

### **Supplementary Table 10: Bayesian 99% credible sets**

*See Excel spreadsheet.*

Bayesian 99% credible sets calculated using Wakefield's method<sup>50</sup> for 276 signals: 139 novel and 137 of 140 previously reported showing significant association in this study (3 HLA signals excluded; **Supplementary Table 8**). Effect sizes and standard errors for the credible set calculation are from the meta-analysis of UK Biobank and SpiroMeta; variants with  $r^2 > 0.4$  with the sentinel and  $P < 10^{-4}$  are included in the calculation the prior probability parameter  $W$  is 0.04. For previously reported signals we used the sentinel variant from the meta-analysis of UK Biobank and SpiroMeta in this study. 182 signals have the sentinel with the (joint) highest posterior probability (109 novel, 73 previous); 20 signals have only the sentinel in the credible set (12 novel, 8 previous); 8 signals do not contain the sentinel in the credible set. Individual regions for all of these 276 signals are available to download as a separate file.

### **Supplementary Table 11: Functional annotation of coding variants in the 99% credible sets**

*See Excel spreadsheet.*

Variants that entered the functional annotation were those annotated as "exonic", "splicing", "ncRNA\_exonic", "5' UTR" or "3' UTR" (untranslated region) by ANNOVAR. Annotation software used: SIFT, PolyPhen-2 and FATHMM all annotate missense variants, and CADD annotates non-coding variation. Variant annotated as deleterious (1) versus not (0) if the variant was labelled 'deleterious' by SIFT, 'probably damaging' or 'possibly damaging' by PolyPhen-2, if it had a CADD scaled score  $\geq 20$ , or was annotated as "damaging" by FATHMM. See also **Online Methods**. Column explanations: All=harmful according to at least one of CADD, SIFT, PolyPhen-2, FATHMM; Post Prob=posterior probability for sentinel variant; Highest PP SNP(s)=SNP(s) with highest posterior probabilities for a credible set; Highest PP=value of highest posterior probability for top SNP for a credible set; Highest Flag=annotated SNP is also top SNP for credible set

### **Supplementary Table 12: Z scores and P values for eQTL look up in lung tissue resources**

Variants in the 99% credible sets that are associated with gene expression at  $FDR < 5\%$  in an eQTL resource ( $n=1,111$ ) of lung tissue from Laval University<sup>51</sup>, Canada, Groningen University<sup>52</sup>, Netherlands and University of British Columbia (UBC)<sup>53</sup>, Canada. The sentinel SNP out of our 279 lung function associated SNPs is given, the SNP most highly associated with expression in the 99% credible set of the lung function sentinel, the posterior probability of this SNP within the credible set, the gene expression Z score and P value and the eQTL SNP most highly associated with gene expression for that gene (eQTL sentinel).

This table includes the eQTL data for all genes where there was a variant in the credible set with  $FDR < 5\%$  for association with expression. Only genes where the eQTL sentinel is in the credible set were added to our list of putative causal genes for downstream analysis.

**Supplementary Table 13: Genes implicated by eQTL or pQTL associations or deleterious variants**

(-): COPD risk allele decreases gene expression or protein level. (+): COPD risk allele increases gene expression or protein level. \*Nine GTEx tissues were screened (n up to 388): Artery Aorta (n=267), Artery Coronary (n=152), Artery Tibial (n=388), Colon Sigmoid (n=203), Colon Transverse (n=246), Esophagus Gastroesophageal Junction (n=213), Esophagus Muscularis (n=335), Small Intestine Terminal Ileum (n=122), and Stomach (n=237) – note direction of gene expression not provided for the genes implicated by these tissues as >1 tissue is screened. 88 genes were implicated where the eQTL sentinel was in our lung function 99% credible set for 58 sentinel SNPs; 5 genes were implicated where the pQTL sentinel was in our lung function 99% credible set for 5 SNPs; 21 genes were implicated by a coding deleterious variant in the 99% credible set for 20 sentinels, giving a union across all 3 look ups of 107 unique putative causal genes. Z scores and P values for the Lung eQTL look up are in **Supplementary Table 12**.

| Novelty  | Nearest_Gene        | Phenotype             | Tier     | Sentinel SNP | Chr | Pos       | COPD risk allele | Alt allele | Lung eQTL          | NESDA-NTR eQTL     | GTEx Lung          | GTEx Whole Blood                      | *Genes that appear >1 in smooth muscle containing GTEx tissues | pQTL plasma proteins | Genes that contain a coding deleterious variant |
|----------|---------------------|-----------------------|----------|--------------|-----|-----------|------------------|------------|--------------------|--------------------|--------------------|---------------------------------------|----------------------------------------------------------------|----------------------|-------------------------------------------------|
| Previous | <i>MFAP2</i>        | FEV <sub>1</sub> /FVC | Previous | rs9435733    | 1   | 17308254  | C                | T          |                    |                    | <i>MFAP2</i> (+)   |                                       |                                                                |                      |                                                 |
| Novel    | <i>DHDDS</i>        | FVC                   | 2        | rs9438626    | 1   | 26775367  | G                | C          |                    |                    |                    | <i>DHDDS</i> (+),<br><i>DRAM2</i> (-) | <i>DHDDS</i>                                                   |                      |                                                 |
| Novel    | <i>DHDDS</i>        | FEV1                  | 1        | rs12096239   | 1   | 26796922  | C                | G          | <i>HMG2</i> (-)    |                    |                    |                                       | <i>DHDDS</i>                                                   |                      |                                                 |
| Previous | <i>LOC101929516</i> | FEV1/FVC              | Previous | rs755249     | 1   | 39995074  | T                | C          |                    |                    |                    | <i>PABPC4</i> (-)                     | <i>PABPC4</i>                                                  |                      |                                                 |
| Novel    | <i>NEXN</i>         | FEV1/FVC              | 1        | rs9661687    | 1   | 78387270  | T                | C          | <i>NEXN</i> (+)    |                    |                    |                                       |                                                                |                      |                                                 |
| Novel    | <i>DENND2D</i>      | FEV1/FVC              | 1        | rs9970286    | 1   | 111737398 | G                | A          |                    | <i>CEPT1</i> (-)   | <i>CHI3L2</i> (-)  | <i>CEPT1</i> (-)                      |                                                                |                      |                                                 |
| Novel    | <i>C1orf54</i>      | PEF                   | 1        | rs11205354   | 1   | 150249101 | C                | A          | <i>MRPS21</i> (+)  | <i>RPRD2</i> (-)   | <i>RPRD2</i> (-)   |                                       |                                                                | <i>ECM1</i> (+)      |                                                 |
| Novel    | <i>KRTCAP2</i>      | FEV1/FVC              | 1        | rs141942982  | 1   | 155153537 | T                | G          |                    |                    |                    |                                       |                                                                | <i>THBS4</i> (+)     |                                                 |
| Novel    | <i>RALGPS2</i>      | FEV1                  | 1        | rs4651005    | 1   | 178719306 | C                | T          |                    |                    | <i>ANGPTL1</i> (-) |                                       |                                                                |                      |                                                 |
| Novel    | <i>LMOD1</i>        | FEV1/FVC              | 2        | rs4309038    | 1   | 201884647 | G                | C          |                    |                    |                    | <i>SHISA4</i> (-)                     |                                                                |                      |                                                 |
| Previous | <i>TGFB2</i>        | PEF                   | Previous | rs6604614    | 1   | 218631452 | C                | G          | <i>TGFB2</i> (+)   |                    |                    |                                       |                                                                |                      |                                                 |
| Novel    | <i>ATAD2B</i>       | FVC                   | 2        | rs13009582   | 2   | 24018480  | G                | A          |                    |                    | <i>UBXN2A</i> (+)  | <i>UBXN2A</i> (+)                     | <i>UBXN2A</i>                                                  |                      |                                                 |
| Novel    | <i>PKDCC</i>        | FVC                   | 1        | rs4952564    | 2   | 42243850  | A                | G          |                    |                    | <i>PKDCC</i> (+)   |                                       |                                                                |                      |                                                 |
| Novel    | <i>ITGAV</i>        | FEV1/FVC              | 1        | rs2084448    | 2   | 187530520 | C                | T          |                    | <i>ITGAV</i> (+)   |                    |                                       |                                                                |                      |                                                 |
| Novel    | <i>SPATS2L</i>      | FEV1/FVC              | 2        | rs985256     | 2   | 201208692 | C                | A          |                    |                    |                    |                                       | <i>SPATS2L</i>                                                 |                      |                                                 |
| Previous | <i>TRAF3IP1</i>     | FEV1                  | Previous | rs6710301    | 2   | 239441308 | C                | A          |                    |                    |                    |                                       |                                                                |                      | <i>ASB1</i>                                     |
| Novel    | <i>C2orf54</i>      | FVC                   | 1        | rs6437219    | 2   | 241844033 | C                | T          | <i>C2orf54</i> (-) |                    | <i>C2orf54</i> (-) |                                       | <i>C2orf54</i>                                                 | <i>C2orf54</i>       |                                                 |
| Previous | <i>SLMAP</i>        | FEV1                  | Previous | rs6445932    | 3   | 57879611  | T                | G          |                    |                    |                    |                                       | <i>SLMAP</i>                                                   |                      |                                                 |
| Novel    | <i>MIR548G</i>      | FVC                   | 1        | rs1610265    | 3   | 99420192  | T                | C          |                    |                    |                    | <i>FILIP1L</i> (-)                    |                                                                |                      |                                                 |
| Previous | <i>RSRC1</i>        | FVC                   | Previous | rs12634907   | 3   | 158226886 | G                | A          |                    |                    |                    | <i>RSRC1</i> (-)                      |                                                                |                      |                                                 |
| Novel    | <i>BCHE</i>         | FEV1/FVC              | 1        | rs1799807    | 3   | 165548529 | C                | T          |                    |                    |                    |                                       |                                                                |                      | <i>BCHE</i>                                     |
| Novel    | <i>BTC</i>          | FEV1/FVC              | 1        | rs62316310   | 4   | 75676529  | G                | A          |                    |                    |                    |                                       |                                                                |                      | <i>BTC</i>                                      |
| Previous | <i>GSTCD</i>        | FEV1                  | Previous | rs11722225   | 4   | 106766430 | T                | C          |                    |                    | <i>INTS12</i> (+)  |                                       | <i>INTS12</i>                                                  |                      |                                                 |
| Previous | <i>NPNT</i>         | FEV1/FVC              | Previous | rs34712979   | 4   | 106819053 | A                | G          |                    |                    |                    |                                       | <i>NPNT</i>                                                    | <i>NPNT</i> (-)      |                                                 |
| Novel    | <i>LOC100996325</i> | FEV1                  | 1        | rs11739847   | 5   | 609661    | A                | G          |                    |                    |                    |                                       |                                                                |                      | <i>CEP72</i>                                    |
| Previous | <i>AP3B1</i>        | FVC                   | Previous | rs425102     | 5   | 77396400  | G                | T          |                    |                    | <i>AP3B1</i> (+)   |                                       |                                                                |                      |                                                 |
| Previous | <i>SPATA9</i>       | FEV1/FVC              | Previous | rs987068     | 5   | 95025146  | C                | G          | <i>RHOBTB3</i> (-) |                    |                    |                                       |                                                                |                      |                                                 |
| Previous | <i>P4HA2-AS1</i>    | FVC                   | Previous | rs3843503    | 5   | 131466629 | A                | T          | <i>SLC22A5</i> (+) | <i>SLC22A5</i> (-) |                    |                                       | <i>P4HA2</i>                                                   | <i>C1QTNF5</i> (-)   |                                                 |
| Previous | <i>CYFIP2</i>       | FEV1/FVC              | Previous | rs11134766   | 5   | 156908317 | T                | C          |                    |                    |                    | <i>ADAM19</i> (+)                     |                                                                |                      |                                                 |
| Previous | <i>ADAM19</i>       | FEV1/FVC              | Previous | rs11134789   | 5   | 156944199 | A                | C          |                    |                    | <i>ADAM19</i> (+)  |                                       | <i>ADAM19</i>                                                  |                      | <i>ADAM19</i>                                   |
| Previous | <i>DSP</i>          | FEV1/FVC              | Previous | rs2076295    | 6   | 7563232   | T                | G          | <i>DSP</i> (+)     |                    |                    | <i>DSP</i> (+)                        |                                                                |                      |                                                 |
| Novel    | <i>RNU6-71P</i>     | FEV1                  | 1        | rs2894837    | 6   | 56336406  | G                | A          |                    |                    |                    |                                       |                                                                |                      | <i>DST</i>                                      |
| Previous | <i>MIR588</i>       | FVC                   | Previous | rs6918725    | 6   | 126990392 | T                | G          |                    |                    |                    |                                       | <i>CENPW</i>                                                   |                      |                                                 |

| Novelty  | Nearest_Gene           | Phenotype | Tier     | Sentinel SNP | Chr | Pos       | COPD risk allele | Alt allele | Lung eQTL                         | NESDA-NTR Blood eQTL           | GTEX Lung                            | GTEX Whole Blood                                         | *Genes that appear >1 in smooth muscle containing GTEX tissues | pQTL plasma proteins | Genes that contain a coding deleterious variant |
|----------|------------------------|-----------|----------|--------------|-----|-----------|------------------|------------|-----------------------------------|--------------------------------|--------------------------------------|----------------------------------------------------------|----------------------------------------------------------------|----------------------|-------------------------------------------------|
| Previous | <i>GPR126</i>          | FEV1/FVC  | Previous | rs17280293   | 6   | 142688969 | A                | G          |                                   |                                |                                      |                                                          |                                                                |                      | <i>GPR126</i>                                   |
| Previous | <i>C1GALT1</i>         | FEV1/FVC  | Previous | rs4318980    | 7   | 7256490   | A                | G          |                                   |                                |                                      |                                                          | <i>C1GALT1</i>                                                 |                      |                                                 |
| Novel    | <i>JAZF1</i>           | FEV1      | 1        | rs1513272    | 7   | 28200097  | C                | T          |                                   |                                |                                      |                                                          | <i>JAZF1</i>                                                   |                      |                                                 |
| Novel    | <i>MET</i>             | FEV1/FVC  | 2        | rs193686     | 7   | 116431427 | T                | C          |                                   |                                |                                      |                                                          | <i>MET</i>                                                     |                      |                                                 |
| Novel    | <i>IER5L</i>           | FEV1      | 2        | rs967497     | 9   | 131943843 | G                | A          | <i>CRAT(-)</i>                    | <i>CRAT(+), PPP2R4(+)</i>      |                                      |                                                          | <i>CRAT</i>                                                    |                      | <i>IER5L</i>                                    |
| Previous | <i>QSOX2</i>           | FVC       | Previous | rs7024579    | 9   | 139100413 | T                | C          | <i>QSOX2(+)</i>                   |                                |                                      |                                                          |                                                                |                      |                                                 |
| Previous | <i>DNLZ</i>            | FVC       | Previous | rs4073153    | 9   | 139259349 | G                | A          | <i>SNAPC4(-)</i>                  | <i>CARD9(+)</i>                | <i>CARD9(+), INPP5E(-)</i>           | <i>CARD9(+)</i>                                          |                                                                |                      |                                                 |
| Previous | <i>CDC123</i>          | FEV1/FVC  | Previous | rs7090277    | 10  | 12278021  | T                | A          |                                   |                                |                                      | <i>NUDT5(+)</i>                                          |                                                                |                      |                                                 |
| Previous | <i>MYPN</i>            | FVC       | Previous | rs10998018   | 10  | 69962954  | A                | G          |                                   |                                |                                      |                                                          |                                                                |                      | <i>MYPN</i>                                     |
| Previous | <i>EML3</i>            | FEV1      | Previous | rs71490394   | 11  | 62370155  | G                | A          |                                   |                                | <i>EEF1G(+), ROM1(+), EML3(-)</i>    | <i>EML3(-)</i>                                           | <i>EEF1G, EML3, ROM1</i>                                       |                      | <i>EML3, ROM1</i>                               |
| Previous | <i>ARHGEF17</i>        | FEV1/FVC  | Previous | rs2027761    | 11  | 73036179  | C                | T          |                                   | <i>FAM168A(-)</i>              |                                      | <i>ARHGEF17(-)</i>                                       |                                                                |                      | <i>ARHGEF17</i>                                 |
| Previous | <i>RAB5B</i>           | FEV1      | Previous | rs1689510    | 12  | 56396768  | C                | G          | <i>CDK2(-)</i>                    |                                |                                      |                                                          |                                                                |                      |                                                 |
| Previous | <i>LRP1</i>            | FEV1/FVC  | Previous | rs11172113   | 12  | 57527283  | T                | C          |                                   |                                |                                      |                                                          | <i>LRP1</i>                                                    |                      |                                                 |
| Previous | <i>FGD6</i>            | FEV1/FVC  | Previous | rs113745635  | 12  | 95554771  | T                | C          | <i>FGD6(+)</i>                    |                                |                                      |                                                          |                                                                |                      |                                                 |
| Novel    | <i>DOCK9</i>           | FEV1/FVC  | 1        | rs11620380   | 13  | 99665512  | A                | C          |                                   |                                |                                      |                                                          |                                                                |                      | <i>DOCK9</i>                                    |
| Novel    | <i>CHAC1</i>           | FVC       | 1        | rs4924525    | 15  | 41255396  | A                | C          |                                   | <i>INO80(+)</i>                | <i>CHP1(+)</i>                       | <i>RAD51(-)</i>                                          |                                                                |                      |                                                 |
| Previous | <i>RPAP1</i>           | FEV1/FVC  | Previous | rs2012453    | 15  | 41840238  | G                | A          | <i>TYRO3(+), ITPKA(+), LTK(+)</i> |                                | <i>ITPKA(-), LTK(-), TYRO3(-)</i>    | <i>RPAP1(+)</i>                                          |                                                                |                      |                                                 |
| Previous | <i>AAGAB</i>           | FVC       | Previous | rs12917612   | 15  | 67491274  | A                | C          |                                   | <i>AAGAB(-), SMAD3(+)</i>      |                                      |                                                          | <i>IQCH</i>                                                    |                      |                                                 |
| Previous | <i>THSD4</i>           | FEV1/FVC  | Previous | rs1441358    | 15  | 71612514  | G                | T          | <i>THSD4(+)</i>                   |                                |                                      |                                                          |                                                                |                      |                                                 |
| Previous | <i>IL27</i>            | FEV1      | Previous | rs12446589   | 16  | 28870962  | A                | G          | <i>SBK1(+), TUFM(-)</i>           | <i>CCDC101(-)</i>              | <i>SULT1A1(-), TUFM(+), SH2B1(-)</i> | <i>NPIP7(-), CLN3(+), SULT1A2(+), ATXN2L(-), TUFM(+)</i> | <i>CCDC101, EIF3C, SH2B1, SULT1A1, SULT1A2, TUFM</i>           |                      | <i>SULT1A2</i>                                  |
| Previous | <i>MMP15</i>           | FEV1/FVC  | Previous | rs11648508   | 16  | 58063513  | G                | T          | <i>MMP15(+)</i>                   |                                | <i>MMP15(-)</i>                      |                                                          |                                                                |                      |                                                 |
| Novel    | <i>ATP2A3</i>          | FEV1/FVC  | 1        | rs8082036    | 17  | 3882613   | G                | C          | <i>ATP2A3(-)</i>                  |                                | <i>ATP2A3(-)</i>                     |                                                          |                                                                |                      |                                                 |
| Novel    | <i>PITPNM3</i>         | FEV1      | 2        | rs4796334    | 17  | 6469793   | A                | G          |                                   | <i>KIAA0753(-), TXNDC17(-)</i> | <i>KIAA0753(-)</i>                   | <i>PITPNM3(+), KIAA0753(-)</i>                           | <i>KIAA0753, PITPNM3</i>                                       |                      | <i>KIAA0753</i>                                 |
| Novel    | <i>TNFSF12-TNFSF13</i> | FEV1      | 2        | rs4968200    | 17  | 7448457   | C                | G          | <i>SEN3(-)</i>                    |                                |                                      | <i>TNFSF13(-)</i>                                        |                                                                |                      |                                                 |
| Novel    | <i>NCOR1</i>           | FVC       | 2        | rs34351630   | 17  | 16030520  | C                | T          |                                   |                                |                                      | <i>ADORA2B(-), TTC19(+)</i>                              | <i>ADORA2B, TTC19</i>                                          |                      |                                                 |
| Previous | <i>SSH2</i>            | FEV1/FVC  | Previous | rs2244592    | 17  | 28072327  | A                | G          |                                   |                                |                                      |                                                          | <i>EFCAB5</i>                                                  |                      |                                                 |
| Previous | <i>FBXL20</i>          | FVC       | Previous | rs8069451    | 17  | 37504933  | C                | T          | <i>CRKRS(-)</i>                   | <i>FBXL20(-)</i>               |                                      |                                                          |                                                                |                      |                                                 |
| Previous | <i>MAPT-AS1</i>        | FEV1      | Previous | rs79412431   | 17  | 43940021  | A                | G          | <i>LRRC37A4(+)</i>                |                                |                                      |                                                          |                                                                |                      | <i>MAPT</i>                                     |
| Previous | <i>TSEN54</i>          | FEV1      | Previous | rs9892893    | 17  | 73525670  | G                | T          |                                   |                                |                                      | <i>CASKIN2(-)</i>                                        |                                                                |                      | <i>TSEN54</i>                                   |
| Novel    | <i>ASPSCR1</i>         | FVC       | 1        | rs59606152   | 17  | 79952944  | C                | T          |                                   |                                |                                      |                                                          |                                                                |                      | <i>LRRC45</i>                                   |
| Novel    | <i>C18orf8</i>         | FVC       | 1        | rs303752     | 18  | 21074255  | A                | G          |                                   |                                |                                      |                                                          | <i>C18ORF8</i>                                                 |                      |                                                 |

| Novelty  | Nearest_Gene | Phenotype | Tier     | Sentinel SNP | Chr | Pos      | COPD risk allele | Alt allele | Lung eQTL | NESDA-NTR Blood eQTL | GTEEx Lung        | GTEEx Whole Blood | *Genes that appear >1 in smooth muscle containing GTEEx tissues | pQTL plasma proteins | Genes that contain a coding deleterious variant |
|----------|--------------|-----------|----------|--------------|-----|----------|------------------|------------|-----------|----------------------|-------------------|-------------------|-----------------------------------------------------------------|----------------------|-------------------------------------------------|
| Novel    | ZFP82        | FVC       | 2        | rs2967516    | 19  | 36881643 | A                | G          | ZFP14(-)  | ZFP82(+)             |                   | ZFP82(+)          |                                                                 |                      |                                                 |
| Previous | LTBP4        | FEV1/FVC  | Previous | rs34093919   | 19  | 41117300 | G                | A          |           |                      |                   |                   |                                                                 |                      | LTBP4                                           |
| Previous | ABHD12       | FEV1      | Previous | rs2236180    | 20  | 25282608 | C                | T          |           |                      | PYGB(+)           |                   | PYGB                                                            |                      | PYGB                                            |
| Previous | UQCC1        | FVC       | Previous | rs143384     | 20  | 34025756 | G                | A          | UQCC1(-)  |                      | UQCC1(-), GDF5(-) | UQCC1(-)          | UQCC1                                                           |                      |                                                 |
| Previous | SLC2A4RG     | FVC       | Previous | rs4809221    | 20  | 62372706 | A                | G          |           |                      |                   | LIME1(-)          | LIME1                                                           |                      |                                                 |
| Previous | SCARF2       | FEV1      | Previous | rs9610955    | 22  | 20790723 | C                | G          |           |                      |                   |                   |                                                                 | SCARF2(+)            | SCARF2                                          |

Footnote:

Genes implicated by a new signal: ADORA2B, ANGPTL1, ATP2A3, BCHE, BTC, C18ORF8, C2orf54, CEP72, CEPT1, CHI3L2, CHP1, CRAT, DHDDS, DRAM2, DST, ECM1, FILIP1L, HMGN2, IER5L, INO80, ITGAV, JAZF1, KIAA0753, LRRC45, MET, MRPS21, NEXN, PITPNM3, PKDCC, PPP2R4, RAD51, RPRD2, SENP3, SHISA4, SPATS2L, THBS4, TNFSF13, TTC19, TXNDC17, UBXL2A, ZFP14, ZFP82.

Genes implicated by a previously reported signal that were not previously implicated<sup>45</sup>: AAGAB, AP3B1, ARHGEF17, ATXN2L, C1QTNF5, CCDC101, CDK2, CENPW, CLN3, CRKRS, DSP, EEF1G, EIF3C, FAM168A, FBXL20, GDF5, IQCH, ITPKA, LTK, NPIP7, PYGB, RPAP1, SBK1, SCARF2, SH2B1, SLMAP, SMAD3, SULT1A1, SULT1A2, TUFM, TYRO3, UQCC1



### Supplementary Table 14: Proteins implicated by pQTL analysis

Lung function sentinel SNPs where one of the SNPs in the 99% credible set is the most highly associated SNP for a protein (top pSNP) in Sun *et al.* protein expression dataset<sup>54</sup> and the association with protein levels is  $P < 5.03 \times 10^{-8}$  (5% Bonferroni-adjusted threshold for 276 independent sentinel SNPs x 3,600 plasma protein levels tested).

| Novelty        | Nearest Gene     | Trait                 | Sentinel SNP ID | Sentinel SNP chrom: Position (b37) | Sentinel SNP Coded/ Noncoded | Top pSNP    | Top pSNP chrom: Position (b37) | Top pSNP Noncoded | Top pSNP Coded | Top pSNP Beta (SE) | P-value  | Protein |
|----------------|------------------|-----------------------|-----------------|------------------------------------|------------------------------|-------------|--------------------------------|-------------------|----------------|--------------------|----------|---------|
| Novel (Tier 1) | <i>C1orf54</i>   | PEF                   | rs11205354      | 1:150,476,516                      | A/G                          | rs11205385  | 1:150,476,516                  | G                 | A              | -0.3153 (0.0245)   | 8.91E-38 | ECM1    |
| Novel (Tier 1) | <i>KRTCAP2</i>   | FEV <sub>1</sub> /FVC | rs141942982     | 1:155,153,537                      | T/C                          | rs111508230 | 1:155,153,537                  | C                 | T              | 0.2170 (0.0388)    | 2.19E-08 | THBS4   |
| Previous       | <i>NPNT</i>      | FEV <sub>1</sub>      | rs34712979      | 4:106,819,053                      | A/G                          | rs34712979  | 4:106,819,053                  | G                 | A              | -0.2274 (0.0280)   | 4.57E-16 | NPNT    |
| Previous       | <i>P4HA2-AS1</i> | FVC                   | rs3843503       | 5:131,567,924                      | A/G                          | rs11955347  | 5:131,567,924                  | G                 | A              | -0.2464 (0.0245)   | 9.12E-24 | C1QTNF5 |
| Previous       | <i>SCARF2</i>    | FEV <sub>1</sub> /FVC | rs9610955       | 22:20,775,556                      | T/G                          | rs738086    | 22:20,775,556                  | G                 | T              | 0.2997 (0.0318)    | 4.79E-21 | SCARF2  |

### Supplementary Table 15: Pathway analysis

Gene-based pathway enrichment analyses. Summary of gene-sets overrepresented in known biological pathways and gene ontology (GO) terms. GO term categories (m= molecular function, b= biological process, c= cellular component) and levels (1 to 5 with high level GO terms assigned to level 1) are indicated. The effective size is the number of genes present in that respective pathway or GO term. Pathways or gene sets represented by only 2 genes from the same association signal have been excluded. FDR: False discovery rate. Novel genes from novel and previous signals are marked with a dagger (†) and double dagger (‡), respectively.

| Genes that contain an eQTL that is in our 99% credible sets (thirteen tissues/datasets) and/or 'deleterious' coding variant (n=104 genes) |          |                                                             |                                                                                                                                                                                                                                                                                                                                                                                                                                                                                  |                                |
|-------------------------------------------------------------------------------------------------------------------------------------------|----------|-------------------------------------------------------------|----------------------------------------------------------------------------------------------------------------------------------------------------------------------------------------------------------------------------------------------------------------------------------------------------------------------------------------------------------------------------------------------------------------------------------------------------------------------------------|--------------------------------|
| Enriched biological pathways                                                                                                              |          |                                                             |                                                                                                                                                                                                                                                                                                                                                                                                                                                                                  |                                |
| P value                                                                                                                                   | FDR      | pathway                                                     | Genes associated with biological pathway                                                                                                                                                                                                                                                                                                                                                                                                                                         | Total size of pathway gene-set |
| 4.26E-07                                                                                                                                  | 9.33E-05 | Molecules associated with elastic fibres                    | <i>ITGAV</i> †; <i>TGFB2</i> ; <i>LTBP4</i> ; <i>MFAP2</i> ; <i>GDF5</i> ‡                                                                                                                                                                                                                                                                                                                                                                                                       | 30                             |
| 9.51E-07                                                                                                                                  | 0.000104 | Elastic fibre formation                                     | <i>ITGAV</i> †; <i>TGFB2</i> ; <i>LTBP4</i> ; <i>MFAP2</i> ; <i>GDF5</i> ‡                                                                                                                                                                                                                                                                                                                                                                                                       | 35                             |
| 3.51E-05                                                                                                                                  | 0.00241  | Extracellular matrix organization                           | <i>MMP15</i> ; <i>TGFB2</i> ; <i>LTBP4</i> ; <i>DST</i> †; <i>ITGAV</i> †; <i>P4HA2</i> ; <i>MFAP2</i> ; <i>GDF5</i> ‡; <i>ADAM19</i>                                                                                                                                                                                                                                                                                                                                            | 294                            |
| 0.000158                                                                                                                                  | 0.00812  | Malaria - Homo sapiens (human)                              | <i>MET</i> †; <i>TGFB2</i> ; <i>LRP1</i> ; <i>THBS4</i> †                                                                                                                                                                                                                                                                                                                                                                                                                        | 49                             |
| 0.000497                                                                                                                                  | 0.017    | Extracellular vesicle-mediated signaling in recipient cells | <i>MET</i> †; <i>TGFB2</i> ; <i>SMAD3</i> ‡                                                                                                                                                                                                                                                                                                                                                                                                                                      | 30                             |
| 0.00059                                                                                                                                   | 0.018468 | Alpha6Beta4Integrin                                         | <i>MET</i> †; <i>DST</i> †; <i>DSP</i> ‡; <i>SMAD3</i> ‡                                                                                                                                                                                                                                                                                                                                                                                                                         | 74                             |
| 0.001345                                                                                                                                  | 0.036822 | TGF-Core                                                    | <i>TGFB2</i> ; <i>GDF5</i> †; <i>SMAD3</i> ‡                                                                                                                                                                                                                                                                                                                                                                                                                                     | 42                             |
|                                                                                                                                           |          |                                                             |                                                                                                                                                                                                                                                                                                                                                                                                                                                                                  |                                |
| Enriched gene ontology terms                                                                                                              |          |                                                             |                                                                                                                                                                                                                                                                                                                                                                                                                                                                                  |                                |
| P value                                                                                                                                   | FDR      | Name of GO term (GO term category/level)                    | Genes associated with GO term                                                                                                                                                                                                                                                                                                                                                                                                                                                    | Total size of pathway gene-set |
| 2.39E-05                                                                                                                                  | 0.007332 | cytoskeleton organization (b/4)                             | <i>TGFB2</i> ; <i>LRP1</i> ; <i>CEP72</i> †; <i>ARHGEF17</i> ‡; <i>DST</i> †; <i>CHP1</i> †; <i>INO80</i> †; <i>DSP</i> ‡; <i>SMAD3</i> ‡; <i>ITPKA</i> ‡; <i>PTPA</i> †; <i>CDK2</i> ‡; <i>FGD6</i> ; <i>MYPN</i> ; <i>NEXN</i> †; <i>MAPT</i> ; <i>KIAA0753</i> †                                                                                                                                                                                                              | 1075                           |
| 0.000271                                                                                                                                  | 0.034539 | regulation of cartilage development (b/5)                   | <i>TGFB2</i> ; <i>PKDCC</i> †; <i>GDF5</i> ‡; <i>SMAD3</i> ‡                                                                                                                                                                                                                                                                                                                                                                                                                     | 62                             |
| 0.000319                                                                                                                                  | 0.025007 | ammonium ion metabolic process (b/3)                        | <i>CRAT</i> †; <i>TGFB2</i> ; <i>CEPT1</i> †; <i>SLC22A5</i> ; <i>CLN3</i> ‡; <i>BCHE</i> †                                                                                                                                                                                                                                                                                                                                                                                      | 182                            |
| 0.00036                                                                                                                                   | 0.025007 | organelle organization (b/3)                                | <i>TGFB2</i> ; <i>CHP1</i> †; <i>INO80</i> †; <i>BTC</i> †; <i>SMAD3</i> ‡; <i>AP3B1</i> ‡; <i>GDF5</i> ‡; <i>ITPKA</i> ‡; <i>CLN3</i> ‡; <i>RAD51</i> †; <i>UBXN2A</i> †; <i>MYPN</i> ; <i>NEXN</i> †; <i>FGD6</i> ; <i>CEP72</i> †; <i>ARHGEF17</i> ; <i>DST</i> †; <i>DSP</i> ‡; <i>SH2B1</i> ‡; <i>CENPW</i> ‡; <i>KIAA0753</i> †; <i>ATXN2L</i> ‡; <i>LRP1</i> ; <i>UQCC1</i> ‡; <i>MRPS21</i> †; <i>PTPA</i> †; <i>CDK2</i> ‡; <i>MAPT</i> ; <i>TTC19</i> †; <i>TUFM</i> ‡ | 3207                           |
| 0.000371                                                                                                                                  | 0.025007 | centriole replication (b/3)                                 | <i>CDK2</i> ‡; <i>KIAA0753</i> †; <i>CEP72</i> †                                                                                                                                                                                                                                                                                                                                                                                                                                 | 28                             |
| 0.000405                                                                                                                                  | 0.004661 | protein kinase activity (m/5)                               | <i>TGFB2</i> ; <i>LTBP4</i> ; <i>CDK12</i> ‡; <i>PKDCC</i> †; <i>ITPKA</i> ‡; <i>MET</i> †; <i>CDK2</i> ‡; <i>BTC</i> †; <i>LTK</i> ‡; <i>SBK1</i> ‡; <i>TYRO3</i> ‡                                                                                                                                                                                                                                                                                                             | 646                            |

|          |          |                                                               |                                                                                                                                                                                                                                                                                                                                                                                                                                                      |      |
|----------|----------|---------------------------------------------------------------|------------------------------------------------------------------------------------------------------------------------------------------------------------------------------------------------------------------------------------------------------------------------------------------------------------------------------------------------------------------------------------------------------------------------------------------------------|------|
| 0.000413 | 0.034539 | positive regulation of cartilage development (b/5)            | <i>PKDCC</i> †; <i>GDF5</i> ‡; <i>SMAD3</i> ‡                                                                                                                                                                                                                                                                                                                                                                                                        | 29   |
| 0.000691 | 0.034539 | transforming growth factor beta2 production (b/5)             | <i>TGFB2</i> ; <i>SMAD3</i> ‡                                                                                                                                                                                                                                                                                                                                                                                                                        | 8    |
| 0.000691 | 0.034539 | mitochondrial respiratory chain complex III assembly (b/5)    | <i>UQCC1</i> ‡; <i>TTC19</i> †                                                                                                                                                                                                                                                                                                                                                                                                                       | 8    |
| 0.000786 | 0.022497 | transmembrane receptor protein kinase activity (m/4)          | <i>LTK</i> ‡; <i>MET</i> †; <i>LTBP4</i> ; <i>TYRO3</i> ‡                                                                                                                                                                                                                                                                                                                                                                                            | 82   |
| 0.000939 | 0.037577 | positive regulation of ossification (b/5)                     | <i>NPNT</i> ; <i>TGFB2</i> ; <i>PKDCC</i> †; <i>SMAD3</i> ‡                                                                                                                                                                                                                                                                                                                                                                                          | 86   |
| 0.001016 | 0.045883 | microtubule-based process (b/3)                               | <i>AP3B1</i> ‡; <i>CEP72</i> †; <i>DST</i> †; <i>CHP1</i> †; <i>INO80</i> †; <i>PTPA</i> †; <i>CDK2</i> ‡; <i>CLN3</i> ‡; <i>MAPT</i> ; <i>KIAA0753</i> †                                                                                                                                                                                                                                                                                            | 611  |
| 0.001136 | 0.045883 | extracellular structure organization (b/3)                    | <i>MMP15</i> ; <i>TGFB2</i> ; <i>THSD4</i> ; <i>ITGAV</i> †; <i>SMAD3</i> ‡; <i>NPNT</i> ; <i>MFAP2</i>                                                                                                                                                                                                                                                                                                                                              | 318  |
| 0.001481 | 0.049872 | phosphorus metabolic process (b/3)                            | <i>DHDDS</i> †; <i>CHP1</i> †; <i>TGFB2</i> ; <i>BTC</i> †; <i>SMAD3</i> ‡; <i>PKDCC</i> †; <i>ADORA2B</i> †; <i>MET</i> †; <i>CDK12</i> ‡; <i>GDF5</i> ‡; <i>ITPKA</i> ‡; <i>CARD9</i> ; <i>CLN3</i> ‡; <i>RAD51</i> †; <i>SULT1A1</i> ‡; <i>NUDT5</i> ; <i>SULT1A2</i> ‡; <i>LTK</i> ‡; <i>SBK1</i> ‡; <i>TYRO3</i> ‡; <i>INPP5E</i> ; <i>RSRC1</i> ; <i>CEPT1</i> †; <i>ITGAV</i> †; <i>NPNT</i> ; <i>PTPA</i> †; <i>CDK2</i> ‡; <i>PITPNM3</i> † | 3164 |
| 0.00149  | 0.022497 | phosphatase binding (m/4)                                     | <i>AP3B1</i> ‡; <i>MET</i> †; <i>PTPA</i> †; <i>MAPT</i> ; <i>SMAD3</i> ‡                                                                                                                                                                                                                                                                                                                                                                            | 165  |
| 0.001512 | 0.04837  | regulation of chondrocyte differentiation (b/5)               | <i>PKDCC</i> †; <i>GDF5</i> ‡; <i>SMAD3</i> ‡                                                                                                                                                                                                                                                                                                                                                                                                        | 45   |
| 0.001824 | 0.022497 | phosphotransferase activity, alcohol group as acceptor (m/4)  | <i>TGFB2</i> ; <i>LTBP4</i> ; <i>CDK12</i> ‡; <i>PKDCC</i> †; <i>ITPKA</i> ‡; <i>MET</i> †; <i>CDK2</i> ‡; <i>BTC</i> †; <i>LTK</i> ‡; <i>SBK1</i> ‡; <i>TYRO3</i> ‡                                                                                                                                                                                                                                                                                 | 777  |
| 0.001846 | 0.04837  | regulation of neuron death (b/5)                              | <i>TGFB2</i> ; <i>LRP1</i> ; <i>CHP1</i> †; <i>GDF5</i> ‡; <i>CLN3</i> ‡; <i>TYRO3</i> ‡                                                                                                                                                                                                                                                                                                                                                             | 255  |
| 0.001935 | 0.04837  | catechol-containing compound metabolic process (b/5)          | <i>TGFB2</i> ; <i>SULT1A1</i> ‡; <i>SULT1A2</i> ‡                                                                                                                                                                                                                                                                                                                                                                                                    | 49   |
| 0.002171 | 0.012484 | transforming growth factor beta receptor binding (m/5)        | <i>TGFB2</i> ; <i>GDF5</i> ‡; <i>SMAD3</i> ‡                                                                                                                                                                                                                                                                                                                                                                                                         | 51   |
| 0.002884 | 0.026674 | transforming growth factor beta binding (m/4)                 | <i>LTBP4</i> ; <i>ITGAV</i> †                                                                                                                                                                                                                                                                                                                                                                                                                        | 16   |
| 0.003486 | 0.016037 | protein phosphatase binding (m/5)                             | <i>AP3B1</i> ‡; <i>MET</i> †; <i>MAPT</i> ; <i>PTPA</i> †                                                                                                                                                                                                                                                                                                                                                                                            | 123  |
| 0.004122 | 0.030499 | kinase activity (m/4)                                         | <i>TGFB2</i> ; <i>LTBP4</i> ; <i>CDK12</i> ‡; <i>PKDCC</i> †; <i>ITPKA</i> ‡; <i>MET</i> †; <i>CDK2</i> ‡; <i>BTC</i> †; <i>LTK</i> ‡; <i>SBK1</i> ‡; <i>TYRO3</i> ‡                                                                                                                                                                                                                                                                                 | 864  |
| 0.004328 | 0.016592 | transmembrane receptor protein tyrosine kinase activity (m/5) | <i>LTK</i> ‡; <i>MET</i> †; <i>TYRO3</i> ‡                                                                                                                                                                                                                                                                                                                                                                                                           | 65   |

## Supplementary Table 16: DeepSEA prediction of functional effect

*See Excel spreadsheet.*

DeepSEA predictions for the SNPs in the 99% credible sets (total n=9446 SNPs) in lung-related cell lines from the RoadMap Epigenome and ENCODE projects. We queried four lung-related cell lines (foetal lung, foetal lung fibroblasts [IMR90], human lung fibroblasts [NHLE] and adenocarcinomic human alveolar basal epithelial cells [A549]) for which 55 chromatin features and transcription factor binding sites were measured. The absolute difference between reference and alternative allele is shown. Only the results for the 161 SNPs with a predicted functional effect (i.e. absolute difference  $\geq 0.1$ ) in  $\geq 1$  cell line are presented. SNPs which have the highest posterior probability in their respective credible sets are coloured in red. Non-significant results (i.e. absolute difference between reference and alternative allele  $< 0.1$ ) are replaced with a “-“ for clarity. E-values (i.e. the expected proportion of SNPs with larger predicted effect for this chromatin feature based on empirical distributions of predicted effects for 1000 Genomes SNPs) for each result are presented in brackets. E-values  $< 0.05$  and  $< 0.01$  are highlighted in red and green, respectively.

## Supplementary Table 17: Druggability analysis

See Excel spreadsheet. Please note that it is possible to filter this table using the drop-down arrows at the top of each column.

Table showing drugs interacting with either high-priority genes that were identified in eQTL or pQTL analysis or annotated as deleterious (N=107) (**Supplementary Table 13**).

The 107 genes were queried against gene-drug interactions within the Drug-Gene Interactions Database (DGIDB) (<http://www.dgidb.org/data/>). The 68 drugs (identified from ChEMBL interactions) that mapped to these genes were mapped to ChEMBL IDs and indications (as Medical Subject Headings, or 'MeSH' terms, <https://www.ebi.ac.uk/chembl/drug/indications>). For each gene, the sentinel SNP that implicated this gene is given. Drug names associated with each gene, plus ChEMBL IDs, and drug indications (with maximum development phase in brackets) are also shown.

In addition to the above analysis, we also undertook a STRING analysis of protein-protein interactions, using the 107 high priority genes described above as input. These results are described in **Supplementary Table 26**.

Column explanations:

- Drug=compound/drug name;
- ChEMBL\_ID=compound identification number from ChEMBL;
- OriginalGeneAndSource=The name(s) of the gene (amongst the set of 107 high priority genes) interacting with the drug;
- IndicationPhase=Drug indication (Phase). Phase 1: Testing of drug on healthy volunteers for dose-ranging; Phase 2: Testing of drug on patients to assess efficacy and safety; Phase 3: Testing of drug on patients to assess efficacy, effectiveness and safety; and Phase 4: Approval of drug and post-marketing surveillance.
- MAB=Drug is a monoclonal antibody;
- OriginalGenesPathway=the gene given in the 'Original Gene and Source' column is a gene identified in the 'Enriched Biological Pathways' shown in **Supplementary Table 15**;
- Cancer=the drug is used to treat some form of cancer;
- Phase3or4=the drug has at least one indication annotated as Phase 3 or 4;
- AsthmaCOPD=the drug is already indicated as being used in asthma or COPD;
- Novelty=the drug is implicated for use by genes identified from novel signals in this GWAS.

**Supplementary Table 18: UK Biobank and China Kadoorie Biobank COPD and FEV<sub>1</sub>/FVC weighted genetic risk score association results (per-allele and per standard deviation) by ancestry**

Individuals in UKB Biobank and China Kadoorie Biobank were included for this analysis, and UK Biobank individuals were divided into ancestry groups as described in **Supplementary Figure 1**. The weighted genetic risk score was tested for association with COPD and FEV<sub>1</sub>/FVC. COPD was defined as FEV<sub>1</sub>/FVC<0.7 and FEV<sub>1</sub><80% predicted (i.e. corresponding to GOLD 2-4 standards). The COPD model (a logistic regression, with COPD coded as COPD [1] vs. no COPD [0]) was adjusted as described in the **Online Methods**. The COPD model was only fitted in ancestral groups with >100 COPD cases. For the FEV<sub>1</sub>/FVC model, linear regression was used. The phenotype was as prepared for the main GWAS described in this paper (see **Online Methods**).

| Ancestry                            | per Allele             |        |        | per Standard Deviation |        |        | P        | Total N | N Control | N Case | Mean risk score | SD risk score |
|-------------------------------------|------------------------|--------|--------|------------------------|--------|--------|----------|---------|-----------|--------|-----------------|---------------|
|                                     | Effect size* (OR/Beta) | 95LCI  | 95UCI  | Effect size* (OR/Beta) | 95LCI  | 95UCI  |          |         |           |        |                 |               |
| <b>COPD</b>                         |                        |        |        |                        |        |        |          |         |           |        |                 |               |
| UK Biobank African                  | 1.033                  | 1.015  | 1.050  | 1.348                  | 1.152  | 1.577  | 1.92E-04 | 4225    | 4053      | 172    | 305.95          | 9.26          |
| UK Biobank South Asian              | 1.030                  | 1.020  | 1.041  | 1.414                  | 1.254  | 1.594  | 1.42E-08 | 6358    | 6046      | 312    | 308.22          | 11.66         |
| UK Biobank Chinese**                |                        |        |        |                        |        |        |          | 1607    | 1558      | 49     | 302.38          | 11.47         |
| UK Biobank European***              | 1.030                  | 1.029  | 1.032  | 1.436                  | 1.411  | 1.461  | <1e-300  | 303570  | 288467    | 15103  | 307.78          | 12.16         |
| UK Biobank Mixed African & European |                        |        |        |                        |        |        |          | 1208    | 1153      | 55     | 305.70          | 10.67         |
| UK Biobank Mixed Other              | 1.035                  | 1.024  | 1.046  | 1.506                  | 1.325  | 1.712  | 3.65E-10 | 6033    | 5752      | 281    | 305.58          | 12.04         |
| China Kadoorie Biobank**            | 1.017                  | 1.014  | 1.019  | 1.219                  | 1.183  | 1.256  | 3.58E-40 | 75580   | 69567     | 6013   | 298.40          | 11.85         |
| <b>FEV<sub>1</sub>/FVC</b>          |                        |        |        |                        |        |        |          |         |           |        |                 |               |
| UK Biobank African                  | -0.009                 | -0.013 | -0.006 | -0.086                 | -0.116 | -0.056 | 2.12E-08 | 4225    |           |        | 305.95          | 9.26          |
| UK Biobank South Asian              | -0.015                 | -0.018 | -0.013 | -0.181                 | -0.205 | -0.156 | 3.72E-47 | 6358    |           |        | 308.22          | 11.66         |
| UK Biobank Chinese**                | -0.012                 | -0.017 | -0.008 | -0.142                 | -0.191 | -0.093 | 1.44E-08 | 1607    |           |        | 302.38          | 11.47         |
| UK Biobank European***              | -0.018                 | -0.019 | -0.018 | -0.224                 | -0.227 | -0.221 | <1e-300  | 303570  |           |        | 307.78          | 12.16         |
| UK Biobank Mixed African & European | -0.016                 | -0.022 | -0.011 | -0.176                 | -0.231 | -0.120 | 7.01E-10 | 1208    |           |        | 305.70          | 10.67         |
| UK Biobank Mixed Other              | -0.015                 | -0.018 | -0.013 | -0.186                 | -0.211 | -0.162 | 7.00E-48 | 6033    |           |        | 305.58          | 12.04         |
| China Kadoorie Biobank**            | -0.007                 | -0.007 | -0.006 | -0.078                 | -0.085 | -0.071 | 5.09E-99 | 72796   |           |        | 298.32          | 11.85         |

\*Effect sizes are odds ratios for COPD results, and change in z-score units for FEV<sub>1</sub>/FVC results

\*\*For details on missing SNPs in UK Biobank Chinese ancestry subjects, and China Kadoorie Biobank participants, see **Online Methods**

\*\*\*Europeans in UK Biobank were the discovery sample for many of the variants in the risk score, which explains the very low p-values in this subgroup.

**Supplementary Table 19: Demographics of COPD case-control cohorts included in risk score analysis**

Descriptive statistics for each cohort are given separately for cases and controls, for five cohorts: the COPD Gene study, the ECLIPSE study (Evaluation of COPD Longitudinally to Identify Predictive Surrogate End-points), GenKOLS (the Bergen, Norway COPD cohort), NETT/NAS (the National Emphysema Treatment Trial [NETT] and the Normative Aging Study [NAS]) and the SPIROMICS study. Abbreviation: SD=standard deviation; age is given in years, height in centimetres, FEV1 and FVC litres.

| Cohort                                   | Case-control status | Total N | % female | Age range | Mean age (SD) | Height range | Mean height (SD) | N with spirometry data | Mean FEV1 (SD) | Mean FVC (SD) | Mean FEV1/FVC (SD) | % ever smokers (N with ever smoking data available) | Pack-years range (N with pack-years data available) | Mean pack-years (SD) |
|------------------------------------------|---------------------|---------|----------|-----------|---------------|--------------|------------------|------------------------|----------------|---------------|--------------------|-----------------------------------------------------|-----------------------------------------------------|----------------------|
| COPDGene (African-American Population)   | Cases               | 910     | 44.84    | 45-81     | 58.6 (8.15)   | 137-208      | 170.96 (10.1)    | 910                    | 1.39 (0.63)    | 0.534 (0.121) | 2.546 (0.879)      | 100 (910)                                           | 10 - 162 (910)                                      | 42.69 (23.48)        |
|                                          | Controls            | 1556    | 40.94    | 45-80     | 52.84 (6.01)  | 142-203      | 171.15 (9.33)    | 1556                   | 2.768 (0.644)  | 0.785 (0.05)  | 3.535 (0.839)      | 100 (1556)                                          | 10 - 160.4 (1556)                                   | 36.11 (19.1)         |
| COPDGene (Non-Hispanic White Population) | Cases               | 3068    | 45.14    | 45-81     | 64.38 (8.28)  | 134-196      | 169.72 (9.45)    | 3068                   | 1.424 (0.659)  | 2.817 (0.908) | 0.495 (0.134)      | 100 (3068)                                          | 10 - 237.6 (3068)                                   | 54.89 (27.12)        |
|                                          | Controls            | 2110    | 51.47    | 45-81     | 59.18 (8.64)  | 140-198      | 169.54 (9.38)    | 2110                   | 2.924 (0.679)  | 3.817 (0.892) | 0.768 (0.044)      | 100 (2110)                                          | 10 - 172.5 (2110)                                   | 37.34 (20.14)        |
| ECLIPSE                                  | Cases               | 1713    | 32.87    | 40-75     | 63.64 (7.1)   | 142-201      | 169.54 (9.02)    | 1713                   | 1.213 (0.487)  | 2.766 (0.873) | 0.441 (0.111)      | 100 (1713)                                          | 6 - 220 (1713)                                      | 50.5 (27.47)         |
|                                          | Controls            | 147     | 42.86    | 40-74     | 57.32 (9.55)  | 151-196      | 171.24 (9.69)    | 147                    | 3.164 (0.779)  | 4.085 (1.03)  | 0.778 (0.054)      | 100 (147)                                           | 10 - 230 (147)                                      | 31.01 (25.94)        |
| GenKOLS                                  | Cases               | 836     | 39.23    | 40-90     | 65.44 (10.1)  | 146-197      | 170 (9.02)       | 836                    | 1.477 (0.699)  | 2.863 (0.957) | 0.502 (0.126)      | 100 (836)                                           | 3 - 130 (836)                                       | 31.88 (18.62)        |
|                                          | Controls            | 692     | 48.84    | 40-88     | 55.43 (9.74)  | 151-200      | 172.05 (8.79)    | 692                    | 3.214 (0.722)  | 4.169 (0.935) | 0.772 (0.041)      | 100 (692)                                           | 2.5 - 90 (692)                                      | 19.4 (13.61)         |
| NETT/NAS                                 | Cases               | 374     | 36.1     | 40-85     | 67.47 (5.76)  | 142-190      | 168.76 (9.53)    | 374                    | 0.726 (0.236)  | 2.299 (0.775) | 0.324 (0.064)      | 100 (374)                                           | 12 - 260 (371)                                      | 66.25 (30.66)        |
|                                          | Controls            | 429     | 0        | 48-89     | 69.86 (7.5)   | 156-192      | 174.46 (6.79)    | 429                    | 3.032 (0.507)  | 3.83 (0.627)  | 0.793 (0.053)      | 100 (429)                                           | 10 - 185.5 (429)                                    | 40.69 (27.79)        |
| SPIROMICS                                | Cases               | 988     | 44       | 41-89     | 65.74 (7.62)  | 141-197      | 170.05 (9.64)    | 988                    | 1.539 (0.605)  | 3.194 (0.927) | 0.48 (0.13)        | 100 (988)                                           | 20.0 - 450 (988)                                    | 56.11 (28.78)        |
|                                          | Controls            | 537     | 53       | 40-80     | 62.95 (9.0)   | 149-205      | 169.54 (9.62)    | 537                    | 2.824 (0.705)  | 3.678 (0.913) | 0.77 (0.04)        | 100 (537)                                           | 20.0 - 400 (537)                                    | 44.76 (26.36)        |

**Supplementary Table 20: External case-control studies COPD risk score association results (per-allele and per standard deviation)**

Results of the association between genetic risk scores and COPD risk are given for both weighted (top) and unweighted (bottom) risk scores (comprising 279 novel and previous signals), for five studies: the COPD Gene study, the ECLIPSE study (Evaluation of COPD Longitudinally to Identify Predictive Surrogate End-points), GenKOLS (the Bergen, Norway COPD cohort), NETT/NAS (the National Emphysema Treatment Trial [NETT] and the Normative Aging Study [NAS]) and the SPIROMICS study. COPD Gene is stratified into African-American and Non-hispanic white subgroups. Effect sizes and 95% confidence intervals are given on two scales: a per-Allele (i.e. raw) scale, and a per standard deviation (SD) scale. Standard deviations for the weighted and unweighted risk scores are given for each cohort separately. Abbreviations: AA=African-American; Nhw=Non-Hispanic white; OR=odds ratio; 95LCI/UCI=lower and upper bounds of 95% confidence intervals; P=p-value; N=sample size. A sensitivity analysis was also run, excluding SNP rs13116999 (see ‘Discussion’ of manuscript). The per-allele meta-analytic estimate was consistent after excluding this SNP. \*The odd ratios per standard deviation increase in the risk score were estimated as:  $\exp(\log OR \text{ on the per allele scale} \times \text{standard deviation of the weighted risk score})$ . \*\*Approximated in R as  $\sqrt{\sum(SD^2 \cdot (N-1)) / \sum(N-1)}$ , where N is a vector of sample sizes, and SD is a vector of standard deviations.

| Ancestry                                          | Study group    | per Allele |       |       | P        | per Standard Deviation* |       |       | P*       | N     |       |          | Mean risk score | SD risk score |
|---------------------------------------------------|----------------|------------|-------|-------|----------|-------------------------|-------|-------|----------|-------|-------|----------|-----------------|---------------|
|                                                   |                | OR         | 95LCI | 95UCI |          | OR                      | 95LCI | 95UCI |          | Total | Cases | Controls |                 |               |
| <b>Weighted</b>                                   |                |            |       |       |          |                         |       |       |          |       |       |          |                 |               |
| African                                           | COPDGene (AA)  | 1.023      | 1.014 | 1.032 | 8.36E-07 | 1.255                   | 1.147 | 1.374 | 8.36E-07 | 2466  | 910   | 1556     | 306.16          | 10.09         |
| European                                          | COPDGene (NHW) | 1.036      | 1.03  | 1.041 | 1.97E-41 | 1.535                   | 1.442 | 1.634 | 1.97E-41 | 5178  | 3068  | 2110     | 307.72          | 12.25         |
| European                                          | ECLIPSE        | 1.039      | 1.023 | 1.055 | 1.42E-06 | 1.585                   | 1.314 | 1.912 | 1.42E-06 | 1860  | 1713  | 147      | 309.80          | 12.16         |
| European                                          | GenKOLS        | 1.042      | 1.031 | 1.052 | 8.99E-15 | 1.623                   | 1.436 | 1.834 | 8.99E-15 | 1528  | 836   | 692      | 308.05          | 11.89         |
| European                                          | NETT/NAS       | 1.032      | 1.017 | 1.047 | 3.13E-05 | 1.464                   | 1.223 | 1.751 | 3.13E-05 | 803   | 374   | 429      | 307.54          | 12.16         |
| European                                          | SPIROMICS      | 1.037      | 1.027 | 1.046 | 4.47E-14 | 1.539                   | 1.376 | 1.721 | 4.47E-14 | 1525  | 988   | 537      | 307.90          | 11.95         |
| Meta-analysis of 5 European-ancestry study groups |                | 1.037      | 1.033 | 1.041 | 1.72E-75 | 1.546                   | 1.476 | 1.620 | 1.48E-75 | 10894 | 6979  | 3915     | 308.13          | 12.14**       |
| <b>Unweighted</b>                                 |                |            |       |       |          |                         |       |       |          |       |       |          |                 |               |
| African                                           | COPDGene (AA)  | 1.015      | 1.005 | 1.025 | 0.00251  | 1.147                   | 1.049 | 1.254 | 0.00251  | 2466  | 910   | 1556     | 298.62          | 9.33          |
| European                                          | COPDGene (NHW) | 1.034      | 1.028 | 1.04  | 3.03E-28 | 1.413                   | 1.329 | 1.503 | 3.03E-28 | 5178  | 3068  | 2110     | 294.74          | 10.36         |
| European                                          | ECLIPSE        | 1.037      | 1.02  | 1.055 | 2.45E-05 | 1.476                   | 1.232 | 1.769 | 2.45E-05 | 1860  | 1713  | 147      | 296.41          | 10.63         |
| European                                          | GenKOLS        | 1.046      | 1.033 | 1.059 | 7.58E-13 | 1.561                   | 1.382 | 1.764 | 7.58E-13 | 1528  | 836   | 692      | 295.60          | 9.96          |
| European                                          | NETT/NAS       | 1.019      | 1.002 | 1.035 | 2.73E-02 | 1.212                   | 1.022 | 1.439 | 2.73E-02 | 803   | 374   | 429      | 294.69          | 10.48         |
| European                                          | SPIROMICS      | 1.036      | 1.025 | 1.047 | 1.62E-10 | 1.435                   | 1.284 | 1.603 | 1.62E-10 | 1525  | 988   | 537      | 294.20          | 10.27         |
| Meta-analysis of 5 European-ancestry study groups |                | 1.035      | 1.030 | 1.039 | 6.71E-52 | 1.425                   | 1.362 | 1.492 | 4.45E-52 | 10894 | 6979  | 3915     | 295.07          | 10.35**       |



**Supplementary Table 21: COPD risk score association results in external case-control studies (per-decile)**

Within each study group, individuals were divided according to their value of the weighted genetic risk score. Logistic models were then fitted for each decile, comparing odds of COPD between members of each decile (2-10) and the lowest decile (1, the reference decile). Results were meta-analysed by fixed-effects across the European-ancestry subjects of COPDGene (Non-hispanic white participants), ECLIPSE, GenKOLS, NETT/NAS, SPIROMICS. Results are presented separately for African-American participants of the COPDGene study

| Decile | Meta-analysis of 5 European Cohorts* |       |       |          | COPDGene (African-American) |       |       |          |
|--------|--------------------------------------|-------|-------|----------|-----------------------------|-------|-------|----------|
|        | OR                                   | LCI   | UCI   | P        | OR                          | LCI   | UCI   | P        |
| 1      | 1.000                                |       |       |          | 1.000                       |       |       |          |
| 2      | 1.470                                | 1.207 | 1.790 | 1.26E-04 | 0.881                       | 0.566 | 1.370 | 0.573    |
| 3      | 1.572                                | 1.289 | 1.918 | 7.97E-06 | 1.407                       | 0.927 | 2.135 | 0.109    |
| 4      | 2.092                                | 1.712 | 2.555 | 4.94E-13 | 1.281                       | 0.838 | 1.961 | 0.253    |
| 5      | 2.045                                | 1.678 | 2.491 | 1.23E-12 | 1.639                       | 1.083 | 2.481 | 0.020    |
| 6      | 2.033                                | 1.666 | 2.481 | 2.93E-12 | 1.214                       | 0.807 | 1.825 | 0.352    |
| 7      | 2.520                                | 2.054 | 3.091 | 7.21E-19 | 1.215                       | 0.784 | 1.882 | 0.383    |
| 8      | 2.800                                | 2.282 | 3.435 | 5.76E-23 | 1.376                       | 0.902 | 2.101 | 0.139    |
| 9      | 3.961                                | 3.213 | 4.883 | 5.15E-38 | 1.895                       | 1.255 | 2.863 | 2.38E-03 |
| 10     | 4.731                                | 3.793 | 5.900 | 3.00E-43 | 2.660                       | 1.753 | 4.036 | 4.25E-06 |

\*COPDGene (Non-hispanic white participants), ECLIPSE, GenKOLS, NETT/NAS, SPIROMICS

## **Supplementary Table 22: Results for PheWAS of weighted genetic risk score**

*See Excel spreadsheet.*

Results are given for 2,453 traits studied. The exposure was the 279-SNP weighted genetic risk score. Each trait was assigned a disease category='Final.Category'). Total sample sizes (N), as well as numbers of cases and controls are given. Odds ratios (OR) are given for binary traits, and beta coefficients are given for continuous traits. Confidence intervals (LCI95, UCI95) and P values are also provided, along with false discovery rates. 'FDR.Flag' denotes associations passing an FDR of <0.01. 'Quant.Resp.Trait' is a flag variable indicating PheWAS results for those SNPs featuring in the main GWAS. 'Figure.Name' denotes the short plain English label used in the Figure in the main text, allowing for cross reference.

## **Supplementary Table 23: Look-up of new and previously reported lung function signals in GRASP and GWAS catalog**

*See Excel spreadsheet.*

Tabulated results of a lookup of sentinel variants and variants in their respective 99% credible sets against all associations  $P < 5 \times 10^{-8}$  in the EBI GWAS catalog (<https://www.ebi.ac.uk/gwas/>) and GRASP (<https://grasp.nhlbi.nih.gov/Overview.aspx>). Associations relating to methylation, expression, metabolite or protein levels, as well as associations with lung function were removed. The table first shows the ID and genomic position of the sentinel variant that was associated with the trait in question (either the sentinel variant, or one of its 99% credible set variants was associated with the trait). Next, the details of the association with lung function for this variant in the current study are shown (trait, whether the signal identified in Tier 1 or Tier 2). If this signal is not a novel signal, details of the original sentinel variant and trait are given. For retrieved studies mapping to the sentinel (or its credible set variants), all reported genes across the studies of interest are given, along with all traits, and the PUBMED IDs of the papers from which associations were retrieved.

### Supplementary Table 24: LD score regression results

Results for the regression of each trait FEV<sub>1</sub>, FVC, FEV<sub>1</sub>/FVC and PEF against the LD score of each variant are shown. Total Observed scale h<sup>2</sup>: Estimate of heritability, Lambda GC: Usual lambda used for genomic control: inflation due to both confounding and polygenicity, Mean  $\chi^2$  : Mean  $\chi^2$  statistic from the association testing, Intercept: Intercept of the LD score regression (estimate of inflation due to confounding but not polygenicity; suggested as a more appropriate genomic-control factor), Ratio: Proportion of total inflation due to confounding (Intercept-1)/(Mean  $\chi^2$  -1). 95% confidence intervals are shown in brackets.

| UK Biobank (n=321,047)                    | FEV <sub>1</sub>     | FVC                  | FEV <sub>1</sub> /FVC | PEF                  |
|-------------------------------------------|----------------------|----------------------|-----------------------|----------------------|
| <b>Total Observed scale h<sup>2</sup></b> | 0.185 (0.173, 0.198) | 0.187 (0.175, 0.199) | 0.211 (0.19, 0.232)   | 0.155 (0.14, 0.17)   |
| <b>Lambda GC</b>                          | 1.841                | 1.841                | 1.841                 | 1.695                |
| <b>Mean Chi<sup>2</sup></b>               | 2.328                | 2.355                | 2.578                 | 2.138                |
| <b>Intercept</b>                          | 1.119 (1.096, 1.142) | 1.139 (1.113, 1.164) | 1.193 (1.162, 1.225)  | 1.133 (1.106, 1.159) |
| <b>Ratio</b>                              | 0.09 (0.072, 0.107)  | 0.102 (0.083, 0.121) | 0.123 (0.103, 0.142)  | 0.117 (0.094, 0.139) |

| SpiroMeta (n=79,055)                      | FEV <sub>1</sub>     | FVC                   | FEV <sub>1</sub> /FVC | PEF                  |
|-------------------------------------------|----------------------|-----------------------|-----------------------|----------------------|
| <b>Total Observed scale h<sup>2</sup></b> | 0.126 (0.107, 0.145) | 0.116 (0.097, 0.134)  | 0.095 (0.077, 0.113)  | 0.094 (0.055, 0.134) |
| <b>Lambda GC</b>                          | 1.146                | 1.146                 | 1.114                 | 1.017                |
| <b>Mean Chi<sup>2</sup></b>               | 1.194                | 1.178                 | 1.141                 | 1.017                |
| <b>Intercept</b>                          | 0.998 (0.983, 1.013) | 1.003 (0.986, 1.019)  | 0.993 (0.979, 1.007)  | 0.972 (0.959, 0.986) |
| <b>Ratio</b>                              | <0                   | 0.014 (-0.078, 0.106) | <0                    | <0                   |

| Meta-analysis (n up to 400,102)           | FEV <sub>1</sub>     | FVC                  | FEV <sub>1</sub> /FVC | PEF                  |
|-------------------------------------------|----------------------|----------------------|-----------------------|----------------------|
| <b>Total Observed scale h<sup>2</sup></b> | 0.154 (0.144, 0.165) | 0.152 (0.142, 0.161) | 0.152 (0.137, 0.167)  | 0.131 (0.118, 0.143) |
| <b>Lambda GC</b>                          | 1.757                | 1.781                | 1.581                 | 1.489                |
| <b>Mean Chi<sup>2</sup></b>               | 2.291                | 2.261                | 2.272                 | 1.919                |
| <b>Intercept</b>                          | 1.041 (1.018, 1.065) | 1.04 (1.015, 1.065)  | 1.033 (1.006, 1.061)  | 1.006 (0.982, 1.031) |
| <b>Ratio</b>                              | 0.032 (0.014, 0.05)  | 0.032 (0.012, 0.051) | 0.026 (0.005, 0.048)  | 0.007 (-0.02, 0.034) |

## Supplementary Table 25: Weights for COPD risk score

See Excel spreadsheet.

Weights for COPD risk score. Weights for each the 279 variants were selected from the FEV1/FVC ratio results for UK Biobank or SpiroMeta. The FEV1/FVC ratio decreasing (i.e. COPD risk *increasing*) allele was chosen. To minimise the risk of winner's curse bias, the study which was not used in the discovery of a given signal was used as the source of the weight. For previously reported signals, this meant that most weights were taken from UK Biobank (if UK Biobank was used in signal discovery, SpiroMeta was used to derive weights). For novel signals identified in this study, the source of weight depended on whether the signal was identified in the two-stage (Tier 1) approach, or the joint, one-stage (Tier 2) approach. SpiroMeta was the source of weights for two-stage signals, and for one-stage signals, the smallest absolute effect size from UK Biobank or SpiroMeta was chosen. Betas are the FEV1/FVC ratio effect size from the study defined in the column 'Source'. Weights were calculated as the beta for a given variant, divided by the sum of all 279 betas, multiplied by the number of variants (279), such that the sum of the weights added to 279.

## Supplementary Table 26: STRING druggability analysis

See Excel spreadsheet. Please note that it is possible to filter this table using the drop-down arrows at the top of each column.

STRING was used to identify high confidence (threshold 0.9) protein-protein interactions with the products of the 107 high-priority genes (**Supplementary Table 13**). 861 drugs were identified using this method (823 of which were not identified in the simple analysis). The drugs were then mapped to ChEMBL IDs and indications (given as Medical Subject Headings, or 'MeSH' terms, <https://www.ebi.ac.uk/chembl/drug/indications>). For each gene demonstrating an interaction, the sentinel SNP that implicated the gene is given. Drug names, plus ChEMBL IDs, and drug indications (with maximum development phase in brackets) are given.

Column explanations:

- Drug=compound/drug name;
- ChEMBL\_ID=compound identification number from ChEMBL;
- OriginalGeneAndSource=This is the name of the gene (or genes) amongst the 107 for which an interaction was identified using STRING analysis. The 'source' in brackets, given after the gene name, details the sentinel SNP in the GWAS that implicated this gene, and the reason for which it was implicated (i.e. location of a deleterious variant, implicated by the eQTL/pQTL analyses);
- STRINGGeneTarget=The name of a gene implicated by a protein-protein interaction identified using STRING (interacting protein targets were mapped back to genes using UniProt);
- IndicationPhase=Drug indication (Phase). Phase 1: Testing of drug on healthy volunteers for dose-ranging; Phase 2: Testing of drug on patients to assess efficacy and safety; Phase 3: Testing of drug on patients to assess efficacy, effectiveness and safety; and Phase 4: Approval of drug and post-marketing surveillance.
- MAB=Drug is a monoclonal antibody;
- OriginalGenesPathway=the gene given in the 'Original Gene and Source' column is a gene identified in the 'Enriched Biological Pathways' shown in **Supplementary Table 15**;
- Cancer=the drug is used to treat some form of cancer;
- Phase3or4=the drug has at least one indication annotated as Phase 3 or 4;
- AsthmaCOPD=the drug is already indicated as being used in asthma or COPD;
- Novelty=the drug is implicated for use by genes identified from novel signals in this GWAS.

## References

1. Miller, M.R. *et al.* Standardisation of spirometry. *Eur Respir J* **26**, 319-38 (2005).
2. Wain, L.V. *et al.* Novel insights into the genetics of smoking behaviour, lung function, and chronic obstructive pulmonary disease (UK BiLEVE): a genetic association study in UK Biobank. *The Lancet Respiratory Medicine* **3**, 769-781 (2015).
3. Bycroft, C. *et al.* Genome-wide genetic data on ~500,000 UK Biobank participants. *bioRxiv* (2017).
4. Bulik-Sullivan, B.K. *et al.* LD Score regression distinguishes confounding from polygenicity in genome-wide association studies. *Nature Genetics* **47**, 291 (2015).
5. Yang, J., Lee, S.H., Goddard, M.E. & Visscher, P.M. GCTA: a tool for genome-wide complex trait analysis. *Am J Hum Genet* **88**, 76-82 (2011).
6. Wain, L.V. *et al.* Novel insights into the genetics of smoking behaviour, lung function, and chronic obstructive pulmonary disease (UK BiLEVE): a genetic association study in UK Biobank. *Lancet Respir Med* **3**, 769-81 (2015).
7. Strachan, D.P. *et al.* Lifecourse influences on health among British adults: effects of region of residence in childhood and adulthood. *Int J Epidemiol* **36**, 522-31 (2007).
8. Marossy, A.E., Strachan, D.P., Rudnicka, A.R. & Anderson, H.R. Childhood chest illness and the rate of decline of adult lung function between ages 35 and 45 years. *Am J Respir Crit Care Med* **175**, 355-9 (2007).
9. Vitart, V. *et al.* SLC2A9 is a newly identified urate transporter influencing serum urate concentration, urate excretion and gout. *Nat Genet* **40**, 437-42 (2008).
10. Zemunik, T. *et al.* Genome-wide association study of biochemical traits in Korcula Island, Croatia. *Croat Med J* **50**, 23-33 (2009).
11. Rudan, I. *et al.* "10001 Dalmatians:" Croatia launches its national biobank. *Croat Med J* **50**, 4-6 (2009).
12. Day, N. *et al.* EPIC-Norfolk: study design and characteristics of the cohort. European Prospective Investigation of Cancer. *Br J Cancer* **80 Suppl 1**, 95-103 (1999).
13. Smith, B.H. *et al.* Cohort Profile: Generation Scotland: Scottish Family Health Study (GS:SFHS). The study, its participants and their potential for genetic research on health and illness. *Int J Epidemiol* **42**, 689-700 (2013).
14. Heistaro, S. Methodology report. Health 2000 survey. in *Publications of National Public Health Institute* (ed. Heistaro, S.) (2000).
15. Kristiansson, K. *et al.* Genome-wide screen for metabolic syndrome susceptibility Loci reveals strong lipid gene contribution but no evidence for common genetic basis for clustering of metabolic syndrome traits. *Circ Cardiovasc Genet* **5**, 242-9 (2012).
16. Holle, R., Happich, M., Lowel, H., Wichmann, H.E. & Group, M.K.S. KORA--a research platform for population based health research. *Gesundheitswesen* **67 Suppl 1**, S19-25 (2005).
17. Wichmann, H.E., Gieger, C., Illig, T. & Group, M.K.S. KORA-gen--resource for population genetics, controls and a broad spectrum of disease phenotypes. *Gesundheitswesen* **67 Suppl 1**, S26-30 (2005).
18. Peters, A. *et al.* [Multimorbidity and successful aging: the population-based KORA-Age study]. *Z Gerontol Geriatr* **44 Suppl 2**, 41-54 (2011).
19. Burney, P.G., Luczynska, C., Chinn, S. & Jarvis, D. The European Community Respiratory Health Survey. *Eur Respir J* **7**, 954-60 (1994).
20. Main Protocol for The European Community Respiratory Health Survey (ECRHS) I, <http://www.ecrhs.org/ECRHS%20I/Main%20protocol.pdf>.
21. Deary, I.J. *et al.* The Lothian Birth Cohort 1936: a study to examine influences on cognitive ageing from age 11 to age 70 and beyond. *BMC Geriatr* **7**, 28 (2007).
22. Rantakallio, P. The longitudinal study of the northern Finland birth cohort of 1966. *Paediatr Perinat Epidemiol* **2**, 59-88 (1988).
23. Sovio, U. *et al.* Genetic determinants of height growth assessed longitudinally from infancy to adulthood in the northern Finland birth cohort 1966. *PLoS Genet* **5**, e1000409 (2009).
24. Jarvelin, M.R., Hartikainen-Sorri, A.L. & Rantakallio, P. Labour induction policy in hospitals of different levels of specialisation. *Br J Obstet Gynaecol* **100**, 310-5 (1993).
25. Jaaskelainen, A. *et al.* Meal frequencies modify the effect of common genetic variants on body mass index in adolescents of the northern Finland birth cohort 1986. *PLoS One* **8**, e73802 (2013).

26. Aulchenko, Y.S., Ripke, S., Isaacs, A. & van Duijn, C.M. GenABEL: an R library for genome-wide association analysis. *Bioinformatics* **23**, 1294-6 (2007).
27. Lind, L., Fors, N., Hall, J., Marttala, K. & Stenborg, A. A comparison of three different methods to evaluate endothelium-dependent vasodilation in the elderly: the Prospective Investigation of the Vasculature in Uppsala Seniors (PIVUS) study. *Arterioscler Thromb Vasc Biol* **25**, 2368-75 (2005).
28. Martin, B.W. *et al.* SAPALDIA: methods and participation in the cross-sectional part of the Swiss Study on Air Pollution and Lung Diseases in Adults. *Soz Praventivmed* **42**, 67-84 (1997).
29. Ackermann-Lieblich, U. *et al.* Follow-up of the Swiss Cohort Study on Air Pollution and Lung Diseases in Adults (SAPALDIA 2) 1991-2003: methods and characterization of participants. *Soz Praventivmed* **50**, 245-63 (2005).
30. Volzke, H. *et al.* Cohort profile: the study of health in Pomerania. *Int J Epidemiol* **40**, 294-307 (2011).
31. Nelson, S.B., Gardner, R.M., Crapo, R.O. & Jensen, R.L. Performance evaluation of contemporary spirometers. *Chest* **97**, 288-97 (1990).
32. Standardization of spirometry--1987 update. Statement of the American Thoracic Society. *Am Rev Respir Dis* **136**, 1285-98 (1987).
33. Quanjer, P.H. *et al.* Lung volumes and forced ventilatory flows. Report Working Party Standardization of Lung Function Tests, European Community for Steel and Coal. Official Statement of the European Respiratory Society. *Eur Respir J Suppl* **16**, 5-40 (1993).
34. Raitakari, O.T. *et al.* Cohort profile: the cardiovascular risk in Young Finns Study. *Int J Epidemiol* **37**, 1220-6 (2008).
35. Wilk, J.B. *et al.* A genome-wide association study of pulmonary function measures in the Framingham Heart Study. *PLoS Genet* **5**, e1000429 (2009).
36. Hancock, D.B. *et al.* Meta-analyses of genome-wide association studies identify multiple loci associated with pulmonary function. *Nat Genet* **42**, 45-52 (2010).
37. Repapi, E. *et al.* Genome-wide association study identifies five loci associated with lung function. *Nat Genet* **42**, 36-44 (2010).
38. Soler Artigas, M. *et al.* Genome-wide association and large-scale follow up identifies 16 new loci influencing lung function. *Nat Genet* **43**, 1082-90 (2011).
39. Cho, M.H. *et al.* A genome-wide association study of COPD identifies a susceptibility locus on chromosome 19q13. *Hum Mol Genet* **21**, 947-57 (2012).
40. Loth, D.W. *et al.* Genome-wide association analysis identifies six new loci associated with forced vital capacity. **46**, 669-77 (2014).
41. Lutz, S.M. *et al.* A genome-wide association study identifies risk loci for spirometric measures among smokers of European and African ancestry. *BMC Genet* **16**, 138 (2015).
42. Soler Artigas, M. *et al.* Sixteen new lung function signals identified through 1000 Genomes Project reference panel imputation. *Nat Commun* **6**, 8658 (2015).
43. Hobbs, B.D. *et al.* Exome Array Analysis Identifies a Common Variant in IL27 Associated with Chronic Obstructive Pulmonary Disease. **194**, 48-57 (2016).
44. Hobbs, B.D. *et al.* Genetic loci associated with chronic obstructive pulmonary disease overlap with loci for lung function and pulmonary fibrosis. *Nat Genet* **49**, 426-432 (2017).
45. Wain, L.V. *et al.* Genome-wide association analyses for lung function and chronic obstructive pulmonary disease identify new loci and potential druggable targets. *Nat Genet* **49**, 416-425 (2017).
46. Wyss, A.B. *et al.* Multiethnic Meta-analysis Identifies New Loci for Pulmonary Function. *bioRxiv* (2017).
47. Jackson, V. *et al.* Meta-analysis of exome array data identifies six novel genetic loci for lung function [version 1; referees: 1 approved with reservations]. *Wellcome Open Research* **3**(2018).
48. Yengo, L. *et al.* Meta-analysis of genome-wide association studies for height and body mass index in ~700,000 individuals of European ancestry. *bioRxiv* (2018).
49. Bulik-Sullivan, B.K. *et al.* LD Score regression distinguishes confounding from polygenicity in genome-wide association studies. *Nat Genet* **47**, 291-5 (2015).
50. Wakefield, J. Reporting and interpretation in genome-wide association studies. *Int J Epidemiol* **37**, 641-53 (2008).
51. Hao, K. *et al.* Lung eQTLs to help reveal the molecular underpinnings of asthma. *PLoS Genet* **8**, e1003029 (2012).

52. Lamontagne, M. *et al.* Refining susceptibility loci of chronic obstructive pulmonary disease with lung eqtls. *PLoS One* **8**, e70220 (2013).
53. Obeidat, M. *et al.* GSTCD and INTS12 regulation and expression in the human lung. *PLoS One* **8**, e74630 (2013).
54. Sun, B.B. *et al.* Genomic atlas of the human plasma proteome. *Nature* **558**, 73-79 (2018).
